# Supplementary material for: A new protocol for single-cell RNA-seq reveals stochastic gene expression during lag phase in budding yeast
Source: eLife. 2020 May 18;9:e55320. doi: 10.7554/eLife.55320 (PMC7259953; doi:10.7554/eLife.55320)
Supplement: Supplementary file 1. [file elife-55320-supp1.csv]

p_val	avg_logFC	pct.1	pct.2	p_val_adj	gene_name
5.77195927654637e-243	-1.4331344290683	0.004	1	2.90849027945171e-239	MPC3
3.91451642132878e-241	-1.95223793585172	0.012	1	1.97252482470757e-237	HXT7
8.00282536554502e-241	-2.16309944508842	0	0.991	4.03262370169813e-237	RGI2
1.39618564182666e-240	-2.39682475970599	0.015	1	7.03537944916455e-237	TMA10
2.01085140187772e-239	-2.75794321180834	0.02	1	1.01326802140618e-235	HSP12
1.72661272490545e-238	-1.76178003612324	0.007	0.989	8.70040152079855e-235	HXK1
6.7739495635233e-237	-1.93159388605206	0.004	0.983	3.41339318505939e-233	SPG4
6.01550197716648e-236	-1.70333995183296	0.022	0.991	3.03121144629419e-232	RGI1
1.78726949255264e-233	-1.6738260048278	0.046	0.998	9.00605097297275e-230	STF2
2.41791982977178e-231	-1.51048072379301	0.032	0.987	1.218389802222e-227	MSC1
4.67613277840586e-231	-1.37833636040653	0.042	0.993	2.35630330703871e-227	SPI1
9.73998282082927e-231	-2.33788084142172	0.066	1	4.90797734341587e-227	HOR7
1.23462520648388e-230	-1.40292663090997	0.005	0.965	6.22127641547225e-227	DCS2
1.32688039353964e-230	-1.5431197409814	0	0.961	6.68615030304624e-227	DDR2
3.96878969645348e-226	-1.36411539404257	0.005	0.952	1.99987312804291e-222	FMP16
4.09136172303578e-226	-1.78289101232287	0.076	0.993	2.06163717223773e-222	TFS1
1.70520096823467e-225	-1.5083011463116	0.062	0.987	8.59250767893448e-222	GLK1
5.1213517761537e-218	-1.63676789526317	0.123	0.996	2.58064916000385e-214	PRX1
6.65965758525735e-218	-1.52878534292102	0.132	0.996	3.35580145721118e-214	ALD4
1.09867602787498e-217	-1.31332903481146	0.046	0.959	5.536228504462e-214	OM14
1.7795336712622e-213	-1.22775065041486	0.094	0.978	8.96707016949024e-210	QCR8
4.83622291014508e-212	-1.28597799956748	0.028	0.93	2.43697272442211e-208	PGM2
8.14912782449185e-210	-1.27394381449662	0.167	0.993	4.10634551076144e-206	LSP1
6.64958958999692e-209	-1.24669594573581	0.158	0.989	3.35072819439945e-205	PNC1
3.86730970854029e-208	-1.15350657713365	0.02	0.913	1.94873736213345e-204	IGD1
3.96920234068566e-207	-1.07773369524293	0.015	0.907	2.00008105947151e-203	TMA17
1.70531116815821e-205	-1.19731555243472	0.142	0.976	8.59306297634922e-202	TPS1
4.49729918424885e-205	-1.10814697515293	0.035	0.917	2.266189058943e-201	GSY2
8.10606545343196e-202	-1.25076892264953	0	0.872	4.08464638198436e-198	POT1
2.64319244029156e-201	-1.31834305256136	0.097	0.948	1.33190467066292e-197	CIT2
5.60942610492103e-201	-1.19469730716731	0.069	0.933	2.82658981426971e-197	SDH3
9.63232450915221e-199	-1.13207134495181	0.081	0.939	4.8537283201618e-195	CIT1
4.29791325275888e-198	-1.28483229215406	0.201	0.978	2.1657184880652e-194	GRX2
5.52337735585218e-198	-1.72915434285283	0.341	1	2.78322984961392e-194	NCE102
1.16668083976328e-195	-1.1821434955314	0.023	0.878	5.87890475156717e-192	ECI1
1.7616625813133e-194	-1.53627643903657	0.395	0.998	8.87701774723774e-191	SPO24
1.02956229980569e-193	1.347137369554	1	0.13	5.18796442872087e-190	SSB1
7.22540406460107e-191	-0.973158907346013	0.009	0.848	3.64088110815248e-187	TSL1
8.95940964854744e-190	-1.40274603723422	0.25	0.976	4.51464652190306e-186	BDH1
1.35190206842642e-189	-1.10081442890943	0.027	0.865	6.81223452280073e-186	INH1
1.60663007661961e-189	-1.25165669008613	0.138	0.939	8.09580895608624e-186	WTM1
3.11339089020747e-189	1.18633984780679	0.987	0.072	1.56883766957555e-185	SSB2
3.2075153393922e-189	1.39664959488772	1	0.428	1.61626697951973e-185	RPS13
7.14364422151315e-189	1.39841729761091	1	0.441	3.59968232322047e-185	RPS1B
7.18853685163481e-189	1.3959402554101	1	0.487	3.62230371953878e-185	RPS5
1.57681589186087e-188	1.21904960343641	0.989	0.128	7.94557527908695e-185	YEF3
3.48351739678571e-188	-0.975020085331585	0.059	0.896	1.75534441624032e-184	HFD1
5.18421388412966e-188	1.29518818108852	1	0.402	2.61232537621294e-184	RPL9A
1.00147833017848e-187	-1.38208923665437	0.034	0.865	5.04644930576938e-184	NQM1
1.15916270348077e-187	1.28860129977556	1	0.528	5.84102086283958e-184	RPL21A
1.7238362720534e-187	-0.879580918869501	0.003	0.828	8.68641097487709e-184	ISF1
2.25090726218215e-187	-1.14890048923169	0.169	0.954	1.13423216941358e-183	MRP8
2.5076936490031e-187	1.24109215121205	0.999	0.35	1.26362682973266e-183	RPS9B
2.86687140583862e-187	1.28631546917794	1	0.548	1.44461650140208e-183	RPS3
8.87764845989803e-187	1.20602158702263	1	0.461	4.47344705894262e-183	RPL5
9.22213873491173e-187	1.18760561078743	1	0.478	4.64703570852202e-183	RPP0
2.47854644275352e-186	-1.36253430044746	0.027	0.852	1.2489395525035e-182	GCY1
2.53525508386211e-186	1.17582217363782	0.999	0.354	1.27751503675812e-182	RPL2B
4.04374440855275e-186	-1.3112066935293	0.004	0.826	2.03764280746973e-182	ADY2
6.35499131461736e-186	-1.3985298943878	0.478	0.993	3.20228012343569e-182	RDL1
1.33003375177002e-185	1.18254600485641	1	0.402	6.70204007516912e-182	RPL16B
1.53914812276652e-185	1.11485529447822	1	0.509	7.75576739062048e-182	RPL8B
3.51451248034637e-185	1.19172793562747	1	0.565	1.77096283884654e-181	RPS24A
7.3640203274603e-184	1.13075610582715	0.999	0.537	3.71072984300724e-180	RPL10
7.54098071431383e-184	1.12331689768999	0.997	0.313	3.79990018194274e-180	RPL18A
8.31693945229672e-184	1.13717855231064	0.999	0.498	4.19090579001232e-180	RPL24A
9.23276854057733e-184	1.141072295395	0.999	0.404	4.65239206759692e-180	RPS4A
1.09480668030375e-183	1.16021235256077	0.997	0.535	5.51673086205062e-180	RPS7A
3.55759898372986e-183	1.13332997475167	0.999	0.491	1.79267412790147e-179	RPS16B
3.73188373468665e-183	1.19459643698586	1	0.313	1.8804962139086e-179	ASC1
4.74511837978639e-183	1.14302039526738	1	0.607	2.39106515157436e-179	RPS17A
1.73306200775126e-182	1.03147372878294	1	0.698	8.73289945705862e-179	RPL28
2.23547135644981e-182	-0.990840581133478	0.039	0.857	1.12645401651506e-178	SNA2
2.86843913240091e-182	-1.2785776994277	0.012	0.824	1.44540647881682e-178	HXT6
9.06215028662986e-182	1.0243550246548	0.999	0.641	4.56641752943278e-178	RPL30
1.95263323797592e-181	-1.33755153804755	0.077	0.883	9.83931888616068e-178	SUC2
3.76569346589221e-181	1.19215270905011	0.989	0.291	1.89753293746308e-177	RPP1B
4.69349350329439e-181	1.02799698068852	1	0.609	2.36505137631004e-177	RPS31
4.69738255182757e-181	0.995252877024376	1	0.713	2.36701106786591e-177	RPL32
6.7229559394983e-181	1.05396571066203	1	0.702	3.3876974979132e-177	RPS15
8.34726250065405e-181	1.09432079599703	0.995	0.413	4.20618557407958e-177	RPL7A
8.39537102946283e-181	-1.31550569135354	0.441	0.993	4.23042746174632e-177	BAT2
1.24458345089901e-180	1.07327480901746	1	0.58	6.27145600908014e-177	RPS12
2.98383321933302e-180	0.922334279362303	1	0.852	1.50355355922191e-176	RPS23B
3.01947685188935e-180	1.12184499895968	0.997	0.554	1.52151438566704e-176	RPS11A
3.18672081010634e-180	1.04369063234269	0.974	0.113	1.60578861621259e-176	RPL2A
6.36370748803402e-180	-0.968165218015381	0.206	0.967	3.20667220322034e-176	UBI4
1.11161289844726e-179	-0.977233316375188	0.051	0.863	5.60141739527573e-176	QCR7
3.51163809995299e-179	1.03543516995454	0.995	0.439	1.76951443856631e-175	RPL16A
4.9363414280841e-179	1.11508901491245	0.988	0.304	2.48742244561158e-175	RPL6A
1.62786909993432e-178	1.14922835742458	0.997	0.437	8.20283239456902e-175	RPS6A
2.7145452400549e-178	1.12353046615629	0.981	0.239	1.36785934646366e-174	RPS17B
3.71841655877359e-178	-1.12524137946327	0.039	0.841	1.87371010396601e-174	PIC2
5.09605035803793e-178	1.06748997362278	0.997	0.55	2.56789977541531e-174	RPL13B
5.68484372416828e-178	0.976353720897953	1	0.641	2.8645927526084e-174	RPS2
7.38149269437299e-178	0.995486312621582	1	0.617	3.71953416869455e-174	RPL3
2.28739693983989e-177	-0.765245442643233	0.013	0.811	1.15261931798532e-173	HSP42
2.77678416508563e-177	0.982839121468844	1	0.754	1.39922154078665e-173	RPL14A
4.20867581391736e-177	1.02674562988556	0.965	0.104	2.12075174263296e-173	RPL22A
5.4921870399692e-177	-1.02478099338954	0.238	0.957	2.76751304944048e-173	PMP3
1.18923633619125e-176	1.01039197646704	0.999	0.567	5.99256189806773e-173	RPL26B
3.5338340189352e-176	0.941376503438497	1	0.826	1.78069896214145e-172	RPL40A
4.18756132618416e-176	1.03619235784426	1	0.554	2.1101121522642e-172	RPL20A
6.42967158382216e-176	-1.28452565869242	0.324	0.97	3.23991151108798e-172	GLO1
8.24148374801466e-176	1.10268009505337	0.992	0.463	4.15288366062459e-172	RPS6B
2.71470749642672e-175	-1.13868128748123	0.271	0.959	1.36794110744943e-171	GRX1
2.75204433213713e-175	1.02538063238772	1	0.6	1.3867551389639e-171	RPS22A
1.59461496125891e-174	0.980340744549353	0.996	0.467	8.03526478978365e-171	RPL19B
4.16014668270535e-174	1.03329050583847	1	0.55	2.09629791341523e-170	CDC19
6.50669888500853e-174	-0.93458675714213	0.013	0.8	3.2787255681558e-170	COX5B
1.49287646253362e-173	0.941510514165087	1	0.593	7.52260449470689e-170	RPL11A
2.74499340791961e-173	1.01928234323128	0.996	0.459	1.38320217825069e-169	RPL25
2.9977938452707e-173	0.957047113664927	1	0.533	1.5105883186319e-169	TMA19
3.1716545982271e-173	0.950291073729998	0.999	0.691	1.59819675204664e-169	RPL23B
3.17708572375429e-173	-1.07267348675783	0.275	0.959	1.60093349619979e-169	UGP1
6.52798929538932e-173	-1.05852194010356	0.335	0.974	3.28945380594668e-169	ARA1
1.51637700782641e-172	-0.958801874894746	0.206	0.95	7.6410237424373e-169	YCP4
2.13103674856315e-171	1.14576861841575	1	0.648	1.07382941760097e-167	PDC1
6.66626232366539e-171	0.867652598265063	0.999	0.859	3.35912958489499e-167	RPS23A
8.08898492958223e-171	-1.03444815902123	0.045	0.828	4.07603950601648e-167	RRT8
1.49198485193302e-170	0.996182984134331	0.991	0.43	7.51811166889048e-167	RPL26A
3.43003630666493e-170	-0.910757508322843	0.008	0.778	1.72839529492846e-166	MHO1
8.87179810452648e-170	0.896623053247611	0.997	0.765	4.47049906487089e-166	RPS18A
1.29914207744562e-169	1.11599104842761	1	0.822	6.54637692824847e-166	ADH1
1.38178132582055e-169	-0.953929523624166	0.059	0.839	6.96279610080976e-166	QCR2
1.43943858246384e-169	-0.833476310009495	0.007	0.774	7.25333101703531e-166	SDH4
2.0034183599721e-169	0.970545827007258	0.953	0.13	1.00952251158994e-165	NOP56
2.18873826388309e-169	0.992407688047512	0.997	0.391	1.10290521117069e-165	SSA2
2.09501124505682e-168	-1.35045545755194	0.024	0.796	1.05567616638413e-164	ALD3
4.75175648725295e-168	-1.01366342927539	0.216	0.941	2.39441009392676e-164	COX13
8.54731824082373e-168	1.18941286146049	0.943	0.072	4.30699366155108e-164	PHO84
1.39856213963888e-167	0.993343259015745	0.974	0.291	7.04735462164033e-164	RPL13A
1.86697833776203e-167	0.907292923657824	0.996	0.539	9.40770384398289e-164	RPS26B
2.80750510579288e-167	-0.979419207429364	0.066	0.837	1.41470182280903e-163	PNS1
5.42400510028418e-167	0.892888961699092	0.997	0.728	2.7331561700332e-163	RPS16A
8.77498934230739e-167	0.917834654118794	0.997	0.583	4.4217171295887e-163	RPL21B
1.64100438042215e-166	0.973265328949872	0.985	0.385	8.26902107294721e-163	RPS1A
1.81973332212534e-166	-1.02258949786821	0.379	0.98	9.16963621018958e-163	PRC1
2.67249010534165e-166	-0.899188933183284	0.08	0.854	1.34666776408166e-162	DCS1
5.85339411266492e-166	-1.00653425066167	0.123	0.887	2.94952529337185e-162	MCR1
7.0610344081461e-166	1.00093708538202	0.987	0.38	3.55805523826482e-162	RPL27B
7.1524809623179e-166	0.975673109685312	0.988	0.452	3.60413515691199e-162	RPL11B
8.00855269312804e-166	0.924257729471445	0.997	0.591	4.03550970206722e-162	RPS19B
9.83639967369348e-166	-0.853964549547346	0.081	0.85	4.95656179557414e-162	RCN2
1.17164440528098e-165	0.9265675947411	0.985	0.4	5.90391615821085e-162	GSP1
3.70937520649873e-165	-0.959797528311364	0.007	0.761	1.86915416655471e-161	SOL4
9.9404665411126e-165	0.905597969818381	0.987	0.489	5.00900109006664e-161	RPL43B
1.05943734468261e-164	-1.0550614515671	0.409	0.978	5.33850477985568e-161	YET1
1.17852315558352e-164	0.918813408643694	0.96	0.187	5.93857818098536e-161	RPP1A
1.47080176266498e-164	0.90426907769821	0.982	0.274	7.41137008206881e-161	RPP2B
2.26587191239224e-164	0.931989293321427	0.981	0.443	1.14177285665445e-160	RPL12B
4.53060615253377e-164	0.832367842748172	0.999	0.652	2.28297244026177e-160	RPL24B
6.75908663618463e-164	-0.862925268014101	0.078	0.846	3.40590375597344e-160	TVP15
9.59726985735938e-163	-0.795690477414285	0.001	0.741	4.83606428112339e-159	YPC1
2.33034547791313e-162	1.10815639345651	0.973	0.248	1.17426108632042e-158	GPP1
2.65464081966207e-162	0.86323258375874	0.988	0.435	1.33767350902772e-158	RPS14A
2.73447647341534e-162	0.893800772543133	0.977	0.372	1.37790269495399e-158	RPL19A
2.23429022586275e-161	0.88777674786837	0.977	0.317	1.12585884481224e-157	RPL17A
3.63577950992532e-161	0.887948852015367	0.995	0.609	1.83206929505137e-157	RPS25A
9.13285923714295e-161	-0.73475191678159	0.009	0.748	4.60204776959633e-157	UGX2
7.08608537872962e-160	-0.940270797147394	0	0.73	3.57067842234186e-156	CYC7
8.0230597645535e-160	-0.834504603705027	0.036	0.785	4.04281981535851e-156	STF1
2.21638172844269e-159	-0.912589193097251	0	0.728	1.11683475296227e-155	ATO2
3.60542233154271e-159	-0.902405102639233	0.139	0.876	1.81677231286437e-155	RFS1
1.51200702852475e-158	0.904234686324906	0.912	0.098	7.6190034167362e-155	RPS0A
6.0607684336807e-158	0.790905947255491	0.999	0.75	3.0540212137317e-154	RPL36B
8.10642080057795e-158	-0.766672845936695	0.016	0.75	4.08482544141123e-154	GPH1
5.92840075876143e-157	0.827431973987237	0.996	0.707	2.98732114233988e-153	RPL33A
6.09348738412186e-157	0.927100271926707	0.984	0.309	3.07050829285901e-153	TDH2
6.87296806923045e-157	0.932881927841792	1	0.857	3.46328861008523e-153	FBA1
1.33855946051636e-156	0.853533291902275	0.989	0.533	6.74500112154194e-153	RPS19A
5.86809708668335e-156	-0.826263595827373	0.028	0.761	2.95693412197974e-152	PET10
5.97848035761554e-156	0.878158480094194	0.987	0.539	3.01255625220247e-152	RPS7B
4.17226085049157e-155	0.919710397290489	0.92	0.133	2.1024022425627e-151	SNU13
4.43731239986166e-155	0.919351505378383	0.972	0.426	2.23596171829029e-151	RPS18B
8.81233394257025e-155	-0.752685066435889	0	0.711	4.44053507366115e-151	PRR2
1.31256354762739e-154	0.929786954833951	0.884	0.048	6.6140077164944e-151	NSR1
2.56283774597692e-154	0.817584130634185	0.973	0.387	1.29141394019777e-150	RPL37A
2.19245428436497e-153	-0.910613540821104	0.355	0.952	1.10477771389151e-149	ATP2
2.67335817461482e-153	-0.943902719295676	0.13	0.859	1.34710518418841e-149	GTT1
3.07714585143521e-153	0.897868502542599	0.945	0.233	1.5505737945382e-149	RPL12A
1.01423250669989e-152	0.726396991467056	0.995	0.637	5.11071760126076e-149	RPL43A
2.84090669521637e-152	-0.79888332692204	0.015	0.728	1.43153288371953e-148	GAD1
1.50021528147537e-151	-0.869309677310341	0.072	0.8	7.55958480335437e-148	GSP2
2.62105372284077e-151	-0.995725311111085	0.769	0.996	1.32074897093946e-147	NCE103
1.03072526139554e-150	0.791853179645615	0.988	0.533	5.19382459217214e-147	RPL23A
1.53815255921232e-149	-0.711177485298086	0.036	0.75	7.7507507458709e-146	GLC3
1.71430473030197e-149	0.82462360606321	0.908	0.128	8.63838153599162e-146	RPL4B
1.75416237941527e-149	-1.01966655781347	0.148	0.863	8.83922422987353e-146	GRE2
1.76128857146424e-149	0.790268128783182	0.996	0.687	8.87513311160828e-146	RPL20B
2.40995077494223e-149	0.870805008740338	0.966	0.402	1.21437419549339e-145	RPL17B
2.66972346084155e-148	0.808388584450096	0.98	0.5	1.34527365191806e-144	RPL4A
4.69020800485829e-148	-0.940006926254891	0.286	0.92	2.36339581364809e-144	PIL1
1.06471200083153e-147	-0.692806735116942	0.009	0.702	5.36508377219007e-144	SDS24
2.4468405215753e-147	-0.763711190417237	0.03	0.735	1.23296293882179e-143	ATG36
1.25007603197707e-145	-0.858791420578168	0.73	0.987	6.29913312513246e-142	PEP4
8.00888377149837e-145	0.877517925417958	1	0.943	4.03567653245803e-141	TDH3
1.06036463973846e-144	-1.01355329817505	0.022	0.713	5.34317741964208e-141	HSP26
1.20534784840126e-144	-0.876301480102409	0.212	0.883	6.07374780809392e-141	ALT1
2.55952861117391e-144	-0.734828579046582	0.009	0.691	1.28974646717053e-140	MRK1
4.11985855928676e-144	0.825808646335732	0.885	0.115	2.0759967280246e-140	GUA1
1.08418889940022e-143	-0.902471993213977	0.348	0.93	5.46322786407771e-140	PST2
1.19559010167927e-143	0.714212242103073	0.999	0.754	6.02457852236182e-140	RPS10A
3.81092345672839e-143	-0.758246094757291	0.096	0.804	1.92032432984544e-139	EDC2
5.85665863782771e-143	-0.818258277788298	0.005	0.678	2.95117028760138e-139	JEN1
8.3261691910884e-142	0.800635478152133	1	0.77	4.19555665538944e-138	TPI1
9.26084521485396e-142	-0.84088980632284	0.179	0.863	4.66653990376491e-138	LSC2
9.26773069730377e-142	0.791498731027527	0.877	0.107	4.67000949837137e-138	STM1
1.53942219685343e-139	0.819806512152107	0.838	0.052	7.75714844994444e-136	URA7
1.6273456463469e-139	-1.04916637262282	0.362	0.928	8.20019471194201e-136	HXT2
2.34903119824439e-139	-0.769386739574189	0.864	0.998	1.18367682079535e-135	TRX2
9.06272949177063e-139	-0.863276249112303	0.242	0.889	4.56670939090322e-135	MDH3
1.95386999969812e-137	-1.02028628438075	0.011	0.667	9.84555092847883e-134	PAI3
3.23042305412058e-137	-0.806598861792518	0.028	0.696	1.62781017697136e-133	CAR2
7.60738584377652e-137	0.732743321819238	0.97	0.472	3.83336172667899e-133	RPS11B
8.05644326085292e-136	0.836228491589048	0.906	0.211	4.05964175914379e-132	RPL33B
1.88383359946915e-135	0.729694648884941	1	0.75	9.49263750772506e-132	GPM1
2.90304081657613e-135	0.748222669866987	0.924	0.257	1.46284226747271e-131	FUN12
8.68173605577506e-135	-0.756585822360347	0.011	0.659	4.37472679850505e-131	BOP2
1.04979073268091e-134	-0.843759530031581	0.062	0.737	5.2898955019791e-131	GDH2
1.28637456997868e-134	-0.718061996969924	0.069	0.743	6.48204145812256e-131	MIC27
1.30051991740896e-134	0.75614959380521	0.964	0.45	6.55331986382374e-131	RPS24B
1.53945225614636e-134	-0.740738093640115	0.036	0.698	7.75729991872152e-131	FAA1
2.35515128762832e-134	0.794531789099315	0.928	0.289	1.18676073383591e-130	GRS1
2.63508569574516e-133	-0.753324538790535	0.084	0.754	1.32781968208599e-129	ATP15
3.42807315206231e-133	0.772772720471553	0.915	0.239	1.7274060613242e-129	RPL31B
3.4782833172727e-133	-0.892103290211047	0.001	0.635	1.75270696357371e-129	SPG1
5.87882304536766e-133	0.736505351454469	0.985	0.626	2.96233893256076e-129	RPS25B
6.67082143182493e-133	-0.798046629405171	0.294	0.904	3.36142691949658e-129	VPS55
1.0699902169621e-132	-0.724890868372361	0.054	0.72	5.39168070327204e-129	DIP5
1.7587489234183e-132	-0.815884747800078	0.004	0.637	8.86233582510483e-129	SPS19
6.8540562601818e-132	-0.695867787540287	0.034	0.689	3.45375894950561e-128	CCP1
9.45272070333795e-132	-0.775791645045349	0.412	0.948	4.76322596241199e-128	YET3
1.26077303451302e-131	-0.696601297156946	0.009	0.643	6.35303532091111e-128	SDH6
1.31233026416143e-131	-0.734619598902163	0.113	0.778	6.61283220110943e-128	YMR31
5.02313413790476e-131	-0.76715713020733	0.001	0.626	2.53115729209021e-127	CTA1
5.81871764830065e-131	-0.717408656577918	0.047	0.702	2.9320518229787e-127	FMP46
6.90558415421385e-131	-0.651626850167101	0.026	0.67	3.47972385530836e-127	PXA1
9.24729581747078e-131	-0.638453427932957	0.036	0.687	4.65971236242352e-127	TPK1
1.27626237859388e-130	-1.14159989889379	0.094	0.754	6.43108612573457e-127	TSA2
2.23525317575757e-130	-0.755511511915986	0.174	0.837	1.12634407526424e-126	YNK1
5.12587421187818e-130	-0.753635484491565	0.019	0.654	2.58292801536541e-126	CAT2
7.98245413761969e-130	-0.881670045707393	0.553	0.972	4.02235863994656e-126	YOP1
1.11139078977318e-129	-0.694540841820288	0.04	0.689	5.60029818966706e-126	AIM19
1.5487843496587e-129	-0.655114609901966	0.036	0.68	7.80432433793019e-126	TPS2
1.95540605688609e-129	0.752438929862381	0.996	0.513	9.85329112064898e-126	PGK1
2.8342274336786e-129	-0.712537371193277	0.119	0.783	1.42816720383065e-125	BXI1
5.05082377119519e-129	-0.702275394588252	0.062	0.715	2.54511009830525e-125	VID24
1.05781966948332e-128	-0.659688879312652	0.009	0.633	5.33035331452644e-125	CMC4
1.67418882068992e-128	-0.92606593573076	0.013	0.639	8.4362374674565e-125	ARO10
6.9361405944159e-128	0.730681405690818	0.775	0.024	3.49512124552617e-124	RRP5
8.16340163655701e-128	0.716666049051017	0.999	0.824	4.11353808466108e-124	HSC82
1.03659270720308e-127	0.761327600982852	0.87	0.178	5.2233906515963e-124	RPL40B
1.11320137532639e-127	-0.640689227814179	0.019	0.646	5.6094217302697e-124	GDB1
6.81299879251935e-127	0.679777237438789	0.984	0.639	3.4330700915505e-123	RPL42A
8.28555141775257e-127	0.655846988783405	0.957	0.454	4.17508935940552e-123	EFB1
1.34457152301705e-126	-0.776123310875163	0.089	0.737	6.7752959044829e-123	QCR6
2.01065359845435e-126	0.688241778057309	0.961	0.472	1.01316834826115e-122	RPS10B
9.42183994418423e-126	0.667440900746433	0.984	0.591	4.74766514787443e-122	RPL34B
8.6780192498677e-124	0.741905319745253	0.804	0.085	4.37285390000833e-120	RPS0B
1.61659296420217e-123	-0.731465553358351	0.086	0.726	8.14601194661472e-120	COX9
1.70444084984093e-123	0.701899274254682	0.76	0.026	8.58867744234843e-120	RLP7
1.71128205925458e-123	0.717383444523857	0.771	0.039	8.62315029658382e-120	CBF5
3.60908193838312e-123	-0.660146406334971	0.036	0.661	1.81861638875125e-119	MDG1
3.80557889849475e-123	-0.735136524014122	0.378	0.917	1.91763120695151e-119	SNA3
2.43931637311394e-121	0.820692157356402	0.842	0.174	1.22917152041211e-117	RPL7B
3.65114490892986e-120	-0.652111563904847	0.009	0.6	1.83981191960976e-116	GPG1
7.60283332159701e-120	-0.592939003423116	0.007	0.593	3.83106771075273e-116	GSY1
1.3213545792089e-119	-0.697142954890132	0.116	0.748	6.65830572463363e-116	YDC1
3.54076361626765e-119	0.777145271328055	0.895	0.315	1.78419078623727e-115	PHO88
9.01275365137481e-119	-0.63397439762427	0.007	0.589	4.54152656492777e-115	UBX6
6.15807092653567e-118	-0.778488561971232	0.078	0.698	3.10305193988132e-114	ICY1
6.91615735248819e-117	-0.729631814801159	0.028	0.622	3.4850516899188e-113	ACS1
8.22735428178575e-116	-0.648828213564219	0.015	0.593	4.14576382259184e-112	USV1
2.37214694835202e-115	-0.659963026480231	0.301	0.878	1.19532484727458e-111	MBF1
9.18379583015582e-115	-0.614682832724248	0.072	0.683	4.62771471881552e-111	NTH1
1.02183410937195e-114	-0.709367757926697	0.19	0.791	5.14902207712527e-111	YPR1
3.26342050906596e-114	0.682590787153653	0.893	0.25	1.64443759451834e-110	PGI1
3.7847417638828e-114	-0.617193991121675	0.047	0.646	1.90713137482054e-110	PFK26
6.24915562315496e-114	0.676340113269712	0.713	0.015	3.14894951850778e-110	NOP1
7.91797693769147e-114	-0.615715313397917	0.157	0.778	3.98986857890273e-110	BCY1
1.44599051071005e-113	0.696477437963979	0.968	0.539	7.28634618346796e-110	RPS26A
8.94775425839516e-113	-0.606329837047311	0.011	0.574	4.50877337080532e-109	GPX1
2.08157359158967e-112	-0.692356558604437	0.281	0.854	1.04890493280203e-108	HYR1
2.46658760551886e-112	-0.616935251859518	0.055	0.65	1.24291349442095e-108	ATG19
3.87861748849634e-112	-0.610371349763729	0.018	0.585	1.95443535245331e-108	ATG8
9.29551118014319e-112	0.722638716842607	0.777	0.107	4.68400808367415e-108	ELO3
1.04544698013231e-111	-0.76165285300612	0.085	0.683	5.26800733288668e-108	OPI3
1.08883903014622e-111	-0.570606789488488	0.011	0.57	5.48665987290683e-108	MAL31
1.09381861750045e-111	0.689214683409563	0.806	0.152	5.51175201358478e-108	THS1
1.21233487033625e-111	-0.646798184981535	0.066	0.663	6.10895541162436e-108	RIM11
1.38919141546742e-111	-0.658482103087607	0.007	0.561	7.00013554254033e-108	IDP3
6.07047461786231e-111	0.694987224410788	0.775	0.102	3.05891215994082e-107	RPL6B
9.78818420974689e-111	-0.638672222169252	0.049	0.633	4.93226602329146e-107	GPT2
1.07589400139342e-110	-0.614449705708874	0.026	0.593	5.42142987302144e-107	GOR1
4.00539084588125e-110	-0.656639015158589	0.895	0.996	2.01831644723956e-106	POR1
7.38549163179874e-110	-0.661248293267733	0.111	0.717	3.72154923326339e-106	ZWF1
1.0173235845057e-109	0.742939267176371	0.709	0.028	5.12629354232424e-106	FIT1
1.75749739982683e-109	-0.576189506325188	0.031	0.6	8.85602939772738e-106	NTH2
1.88478777134106e-109	-0.644734040885175	0.067	0.659	9.49744557978759e-106	MCH4
7.51037969679209e-109	-0.621520414644879	0.103	0.7	3.78448032921353e-105	GPD1
8.86985258236161e-109	0.674839785502727	0.729	0.057	4.46951871625201e-105	DBP2
1.19020756137456e-108	-0.641990653327869	0.05	0.626	5.99745590176643e-105	OM45
2.65896816196829e-107	0.601473131978837	0.78	0.12	1.33985405681582e-103	EFT2
3.11308920369209e-107	-0.688506036753682	0.484	0.928	1.56868564974044e-103	BMH2
1.20785812701063e-106	-0.774288530209289	0.24	0.809	6.08639710200658e-103	ATP7
3.17813372708177e-106	0.635153945401183	0.933	0.511	1.6014615850765e-102	RPL34A
3.78071580815671e-106	0.687068292907877	0.965	0.446	1.90510269573016e-102	ERG3
4.70138240663291e-106	-0.699316623403061	0.163	0.75	2.36902659470232e-102	LSC1
2.61309132241041e-105	-0.609605511101591	0.127	0.726	1.31673671736261e-101	ATP20
8.04201965854445e-105	0.608594191612528	0.904	0.337	4.05237370594055e-101	SSE1
1.14477647927018e-104	-0.605077709659289	0.022	0.563	5.76852867904246e-101	SHH4
1.3748791394446e-104	-0.596862780845491	0.007	0.533	6.92801598366132e-101	PUT1
6.77285451530555e-104	-0.706538862977455	0.197	0.778	3.41284139026247e-100	ATP3
9.00338928803622e-104	-0.606539375329288	0.108	0.687	4.53680786224145e-100	PTK2
1.63167038424039e-103	0.618170659455513	0.879	0.337	8.2219870661873e-100	RPS21B
2.39630759172478e-103	-0.596797061348842	0.163	0.75	1.20749939547012e-99	UIP3
7.48473161127549e-103	0.670603918107958	0.876	0.346	3.77155625892172e-99	RPS22B
7.66093501090268e-103	-0.554808207144981	0.008	0.528	3.86034515199386e-99	COX7
8.66590281664354e-103	0.615159507884368	0.812	0.193	4.36674842930668e-99	ZUO1
3.86754958357578e-102	-0.533740253673226	0.03	0.57	1.94885823516384e-98	GID8
5.0517770240689e-102	0.607785096650793	0.659	0.011	2.54559044242832e-98	NOP7
5.28621942343549e-102	-0.64843821585202	0.155	0.737	2.66372596746915e-98	ETR1
5.8296140316162e-102	-0.646939263099683	0.107	0.676	2.9375425105314e-98	EMI2
6.1609727328291e-102	-0.522803254352577	0.028	0.567	3.10451416007258e-98	ATG34
7.92757398360296e-102	-0.490841844741814	0.082	0.657	3.99470453033753e-98	HSP78
1.06179811478874e-101	-0.572783560721559	0.028	0.565	5.35040070042046e-98	FOX2
2.50754590114648e-101	0.585025819985624	0.872	0.32	1.26355237958771e-97	PAB1
4.10981388095824e-101	-0.490328300805497	0.003	0.509	2.07093521461486e-97	GIP2
9.99197713716239e-101	-0.622456562692046	0.144	0.722	5.03495727941613e-97	RAV2
1.57806810163807e-100	-0.61852068706178	0.252	0.809	7.95188516415423e-97	SNC1
1.94695858268057e-100	-0.569120369541408	0.019	0.541	9.8107242981274e-97	FMP33
3.28948437549218e-100	0.55184502794919	0.912	0.435	1.65757117681051e-96	RPP2A
5.99617802512662e-100	-0.587192443290501	0.104	0.674	3.02147410686131e-96	MDH1
1.37249055117259e-99	0.613230468326683	0.795	0.17	6.9159798873587e-96	TOS1
1.86172682203108e-99	0.45520091007077	1	0.926	9.38124145621461e-96	RPL15A
2.41564653051527e-99	-0.722858917783588	0.011	0.52	1.21724428672664e-95	CTT1
3.58180754847236e-99	-0.554155727823425	0.034	0.565	1.80487282367522e-95	ULA1
4.180318101896e-99	-0.736472535601565	0.019	0.535	2.10646229154539e-95	RTN2
3.77651810097946e-98	-0.58041791595254	0.088	0.646	1.90298747108355e-94	MRPS12
6.24304406994635e-98	-0.633547524878927	0.013	0.52	3.14586990684596e-94	URA10
1.62571001172765e-97	-0.476196728839511	0.005	0.5	8.19195274909562e-94	TDA1
2.25337935477667e-97	-0.543605117581565	0.055	0.598	1.13547785687196e-93	SCS7
2.33279104937129e-97	-0.482775821840559	0.028	0.55	1.17549340977819e-93	MIX14
2.95093885963971e-97	0.683997578647304	0.785	0.187	1.48697809137245e-93	OLE1
5.83113962603621e-97	0.627104226066481	0.721	0.1	2.93831125755964e-93	IMD3
6.8580464673604e-97	-0.601767240472589	0.424	0.896	3.45576961490291e-93	VPS68
1.51650504424177e-96	0.584907690458432	0.866	0.322	7.64166891793426e-93	RPL38
2.07579597664045e-96	-0.533417132367015	0.047	0.578	1.04599359262912e-92	NGR1
5.22949133810294e-96	-0.53943370417367	0.04	0.567	2.63514068527007e-92	OXR1
5.97427174257761e-96	-0.495442123663768	0.005	0.493	3.01043553108486e-92	CYT1
1.56117317375284e-95	-0.648429810584296	0.008	0.498	7.86675162254055e-92	BDH2
4.35168238958294e-95	0.623584469005245	0.838	0.304	2.19281275611084e-91	CYS4
4.88508140574184e-95	0.571035005072223	0.733	0.115	2.46159252035331e-91	OLA1
5.06626552092385e-95	-0.552301222127062	0.117	0.672	2.55289119599353e-91	NYV1
5.32056618458348e-95	-0.486714833455023	0.023	0.528	2.68103330041162e-91	TDA10
9.09184749737774e-95	-0.545962328944384	0.055	0.585	4.58138195392864e-91	COQ4
1.59693656949075e-94	0.595212894811347	0.703	0.08	8.04696337366388e-91	CDC60
1.89582184595233e-94	-0.453525503385032	0.09	0.637	9.55304628175381e-91	PIN3
3.9055923703338e-94	0.617397673981665	0.702	0.091	1.9680279954112e-90	KRS1
4.0710462389657e-94	0.589432394974365	0.688	0.074	2.05140019981482e-90	BRX1
4.81320674212189e-94	-0.602462723543821	0.197	0.754	2.42537487735522e-90	AYR1
1.38282088506455e-93	-0.502427426056982	0.05	0.574	6.96803443984025e-90	CCC1
1.98919670171536e-93	0.6511772825489	0.85	0.359	1.00235621799437e-89	SEC53
1.99268865817373e-93	-0.639449698951656	0.138	0.689	1.00411581485374e-89	ATP16
2.40552798267608e-93	-0.493089282609313	0.031	0.537	1.21214555047048e-89	FUN19
6.28740745725839e-93	-0.842108643390358	0.023	0.52	3.1682246177125e-89	YGP1
1.44477062359287e-92	-0.569674308591704	0.135	0.691	7.28019917228449e-89	MRPL36
2.30766019376149e-92	-0.507833121011217	0.055	0.578	1.16282997163641e-88	TGL4
7.7509500154958e-92	0.593754801548558	0.692	0.089	3.90570371280834e-88	TIF3
8.61521551114969e-92	-0.612938943683657	0.223	0.759	4.34120709606833e-88	ECM15
9.08894771640081e-92	0.681729565871052	0.737	0.148	4.57992075429437e-88	FTR1
1.68582244460782e-91	0.622227590377874	0.762	0.172	8.49485929837882e-88	RPS14B
2.98687723526076e-91	-0.515819747228815	0.047	0.559	1.5050874388479e-87	YTP1
3.01711598726811e-91	0.580709691415177	0.684	0.078	1.5203247459844e-87	IMD4
3.19312389148523e-91	0.605741394249625	0.822	0.27	1.60901512891941e-87	SPE3
3.78851985917919e-91	0.717403231619585	0.789	0.215	1.90903515704039e-87	PSA1
6.05302796923984e-91	0.584140799150439	0.744	0.139	3.05012079369995e-87	CYS3
1.41383911091194e-90	-0.464227625534956	0.03	0.524	7.12433527988526e-87	SSE2
2.00256835602589e-90	0.545730513640694	0.638	0.039	1.00909419460144e-86	MRT4
3.19703718552535e-90	-0.55158204807548	0.011	0.483	1.61098703778622e-86	GAP1
4.56210831956535e-90	-0.457232199069734	0.004	0.465	2.29884638222898e-86	ATH1
5.10963531077495e-90	0.605467419448532	0.819	0.237	2.5747452330995e-86	TKL1
1.11641417377296e-89	0.562637083727469	0.856	0.383	5.62561102164192e-86	SES1
1.45585880976812e-89	-0.5413201568109	0.116	0.652	7.33607254242157e-86	NSG2
2.68927476250061e-89	-0.523182525922046	0.069	0.587	1.35512555282406e-85	SDS22
3.35140582805366e-89	0.590744770248768	0.939	0.637	1.68877339675624e-85	FET3
1.71267642456866e-88	-0.51830643780313	0.035	0.526	8.63017650340145e-85	AIM41
1.78325924535603e-88	0.691507566054773	0.671	0.076	8.98584333734906e-85	CIS3
2.43161933872628e-88	-0.592739145461845	0.161	0.698	1.22529298478417e-84	ATP18
2.56381847285239e-88	-0.501929857232567	0.051	0.554	1.29190812847032e-84	COX20
5.47636343059664e-88	-0.502521059307968	0.055	0.559	2.75953953267765e-84	SDH8
2.37009062010647e-87	-0.465532674168744	0.011	0.47	1.19428866347165e-83	COR1
3.47151779590286e-87	-0.521836432258615	0.086	0.607	1.74929781735545e-83	TIM11
8.19088977344112e-87	-0.530894499977724	0.182	0.724	4.12738935683698e-83	GLC8
9.95485608161937e-87	-0.851468309439784	0.359	0.807	5.016251979528e-83	NHP6B
4.93425916208467e-86	-0.481517435429109	0.077	0.589	2.48637319177446e-82	FUN14
5.79684462427696e-86	-0.473732098616655	0.013	0.47	2.92103000617316e-82	AAC1
1.53159388099434e-85	-0.540717425575984	0.138	0.663	7.71770156633048e-82	EMI1
3.18967100793851e-85	-0.548516061844147	0.305	0.822	1.60727522090022e-81	SEC17
3.49127288542618e-85	-0.577948310960291	0.084	0.589	1.75925240696625e-81	GCV1
9.07317630205957e-85	-0.477455393280216	0.003	0.439	4.57197353860782e-81	FAA2
1.66187457096801e-84	-0.485832677793322	0.02	0.478	8.3741859631078e-81	COX4
2.45566009360498e-84	-0.466875076070306	0	0.43	1.23740712116755e-80	POX1
4.06893197251111e-83	-0.917929845267614	0.117	0.62	2.05033482094835e-79	TDH1
5.19130388277265e-83	0.553134828621082	0.757	0.222	2.61589802652914e-79	TEF4
1.22802276126292e-82	-0.549680746605983	0.063	0.548	6.18800669400385e-79	ECM4
1.32949542031688e-82	-0.428529404872158	0.011	0.45	6.69932742297675e-79	CSR2
2.38964733513955e-82	-0.537341639966377	0.228	0.748	1.20414329217682e-78	GLO2
2.65796990365844e-82	-0.491841662076099	0.088	0.591	1.33935103445349e-78	MCT1
2.66425235224186e-82	-0.48868341355354	0.072	0.563	1.34251676029467e-78	AVT6
2.71460103829221e-82	-0.447906785964959	0.005	0.435	1.36788746319544e-78	COA2
6.24612669038627e-82	-0.496133198320372	0.059	0.541	3.14742323928564e-78	ISA1
1.05718036139668e-81	-0.546183915786516	0.066	0.548	5.32713184107787e-78	UBC8
1.4224624530745e-81	-0.531814435669364	0.092	0.589	7.16778830104239e-78	APE1
1.60987035240456e-81	0.547985375730358	0.926	0.535	8.11213670576657e-78	ERG6
2.40753334198238e-81	-0.579630372832653	0.337	0.815	1.21315605102492e-77	ARC15
4.45793348456956e-81	-0.434068450000065	0.004	0.426	2.2463526828746e-77	FMP40
5.7556404869097e-81	-0.441653317302187	0.032	0.489	2.9002672413538e-77	IRC9
8.79863076260832e-81	-0.5394840424837	0.012	0.443	4.43363004127833e-77	RRT1
1.35116378643637e-80	-0.488536592650509	0.973	0.996	6.80851431985288e-77	SOD1
1.406556125299e-80	0.527770477651936	0.672	0.107	7.08763631538168e-77	SHB17
1.4943524262017e-80	-0.450327706820183	0.007	0.43	7.53004187563036e-77	GUT2
3.19201814661486e-80	0.550355410237519	0.922	0.567	1.60845794407923e-76	ADK1
3.24172973390828e-80	-0.4797961342175	0.047	0.513	1.63350761291638e-76	COX12
6.43792635330501e-80	-0.650011674579965	0.073	0.552	3.2440710894304e-76	HSP31
9.52479602929809e-80	-0.453658734754959	0.031	0.48	4.79954471916331e-76	KGD1
2.11961162382278e-79	-0.511521523798577	0.076	0.557	1.0680722972443e-75	ATG33
3.84698499804068e-79	-0.601384130513589	0.198	0.693	1.9384957405127e-75	CTR1
6.13790805767005e-79	-0.483353212787544	0.147	0.657	3.09289187025994e-75	DOT5
7.10324563290999e-79	-0.527520015915672	0.698	0.948	3.57932547442334e-75	HNT1
1.21066059859761e-78	-0.422095049832597	0.015	0.441	6.10051875633338e-75	RNY1
1.46901588717295e-78	-0.510142962592698	0.161	0.661	7.40237105546448e-75	COQ9
4.5819377830361e-78	-0.625316189665824	0.541	0.889	2.30883844887189e-74	GLN1
5.90762144390805e-78	0.50827067117832	0.7	0.157	2.97685044558526e-74	LHP1
7.12120138405207e-78	-0.604985054271509	0.003	0.409	3.58837337742384e-74	CYB2
1.1120542715315e-77	0.514765102399601	0.606	0.057	5.60364147424724e-74	RPF2
2.11468047539777e-77	-0.509986608434836	0.085	0.561	1.06558749155294e-73	RSM10
3.79918271382837e-77	-0.498089890080388	0.259	0.757	1.91440816949811e-73	UBC7
5.60677029950227e-77	-0.448958112328804	0.042	0.491	2.82525155391919e-73	PEX29
1.16797452354869e-76	-0.727820523969027	0.004	0.407	5.88542362416183e-73	GRE1
1.52122379275078e-76	-0.505789869853386	0.161	0.661	7.66544669167117e-73	ERP6
1.55388574771288e-76	-0.447117270574032	0.028	0.461	7.8300302827252e-73	AMS1
1.70657752916351e-76	0.502775855558575	0.742	0.224	8.59944416945491e-73	RPL37B
2.8044031220231e-76	-0.408198133619739	0.034	0.474	1.41313873318744e-72	OPI10
2.9010030698532e-76	-0.452591143864437	0.001	0.398	1.46181544689903e-72	MBR1
3.50161698939927e-76	0.540776754767844	0.748	0.204	1.76446480095829e-72	ILV5
1.95669487137305e-75	-0.518768557256726	0.341	0.804	9.85978545684877e-72	ARP3
2.20221981117982e-75	-0.444166340457849	0.042	0.483	1.10969856285351e-71	CRD1
2.31535696725146e-75	-0.501987107964191	0.289	0.78	1.16670837579801e-71	MRP51
4.29720508619118e-75	-0.457632181337988	0.051	0.498	2.16536164293174e-71	VPS73
5.67666927910959e-75	-0.427173218346682	0.005	0.402	2.86047364974332e-71	CAT8
8.09051015753562e-75	0.542831906884482	0.754	0.243	4.0768080683822e-71	TIF11
1.08811467979476e-74	-0.528875558235377	0.279	0.759	5.4830098714858e-71	ATP4
1.72036925824929e-74	-0.548080458281607	0.148	0.633	8.66894069231815e-71	PYC1
1.83241694904839e-74	-0.532954920402844	0.117	0.593	9.23354900625483e-71	POM33
2.28354462377802e-74	-0.447568029923733	0.013	0.42	1.15067813592174e-70	PIG2
2.5352756799569e-74	0.486721292840054	0.54	0.02	1.27752541513028e-70	NUG1
1.09335583544111e-73	-0.467369423115808	0	0.383	5.50942005478778e-70	COX26
1.2237149023405e-73	-0.397787411800732	0.026	0.443	6.1662993928938e-70	VHS3
1.60256033293775e-73	-0.609496268942072	0.536	0.872	8.07530151767332e-70	GCV3
2.43855124348927e-73	-0.41750620198259	0.022	0.433	1.22878597159424e-69	FMP10
2.49457834528928e-73	-0.624454793613153	0.066	0.511	1.25701802819127e-69	EEB1
3.57100320436237e-73	-0.495397932478975	0.735	0.965	1.7994285146782e-69	PFY1
5.866216170813e-73	-0.446168518680524	0.051	0.491	2.95598632847267e-69	ZTA1
1.94154717351045e-72	0.568080837529182	0.916	0.507	9.78345620731918e-69	SIT1
3.94148912488154e-72	-0.376363348431931	0.022	0.428	1.98611637002781e-68	FYV10
4.05524794582275e-72	-0.710231371259601	0.68	0.959	2.04343943990008e-68	HHT1
4.06267622914288e-72	-0.520935461417596	0.211	0.691	2.0471825518651e-68	ATP5
4.94442462789952e-72	-0.421630207121933	0.053	0.491	2.49149556999857e-68	EIS1
5.6333692432338e-72	-0.457981853479344	0.128	0.604	2.83865476166551e-68	FRA1
7.45069567348707e-72	0.580966226500907	0.711	0.193	3.75440554987013e-68	FCY2
8.44996536095697e-72	0.498583859294998	0.536	0.026	4.25793754538622e-68	SPB1
9.26356498718212e-72	0.499304691979557	0.541	0.03	4.66791039704107e-68	RKI1
9.98407262677811e-72	-0.402399708399653	0.003	0.38	5.03097419663349e-68	PHM7
1.02703685731444e-71	-0.492503216341357	0.277	0.737	5.17523872400747e-68	ARC19
1.22604914681108e-71	0.464509273490971	0.943	0.687	6.17806165078106e-68	RPS28A
1.62842863474957e-71	-0.413302718594862	0.028	0.439	8.20565189050308e-68	UBP11
1.62860221653866e-71	-0.381295762730949	0.016	0.413	8.20652656913833e-68	MPM1
1.88387740591691e-71	-0.567742562890102	0.389	0.809	9.4928582484153e-68	ATP1
2.47262721495471e-71	-0.426477707124051	0.043	0.467	1.24595685361568e-67	SDH5
6.91598051987363e-71	-0.473765502379385	0.71	0.957	3.48496258396432e-67	ARF2
9.1859760508134e-71	0.454380461004284	0.53	0.026	4.62881333200487e-67	NOP58
1.16646680134546e-70	0.486872114359162	0.565	0.05	5.87782621197975e-67	HIS1
1.87319381702931e-70	-0.483584397319522	0.063	0.5	9.43902364401072e-67	AGP1
1.975566463599e-70	-0.457632887591383	0.072	0.511	9.95487941007534e-67	ATP17
2.50184966633703e-70	0.476346631457359	0.606	0.087	1.26068204686723e-66	ARB1
3.39947825853343e-70	0.546524069507562	0.85	0.457	1.71299709447499e-66	HOM2
3.76981536193967e-70	-0.384530997224008	0.019	0.413	1.8996099608814e-66	XKS1
3.8019891027655e-70	-0.396850631560388	0.008	0.387	1.91582230888354e-66	YPS6
4.71176910319353e-70	-0.366394176695155	0	0.365	2.37426045109922e-66	MTH1
5.12515707329104e-70	-0.405626613462326	0.027	0.43	2.58256664923136e-66	FBP26
7.64424035927121e-70	-0.484792742450156	0.197	0.67	3.85193271703676e-66	ARC18
2.49265700247087e-69	0.482728621290353	0.677	0.174	1.25604986354507e-65	RPL18B
2.80127072392102e-69	-0.407877530564893	0.121	0.576	1.4115603177838e-65	HSP104
3.61137603801478e-69	-0.671958070108708	0.762	0.937	1.81977238555565e-65	RIB4
5.18029336601946e-69	-0.504753017184656	0.325	0.763	2.6103498271372e-65	GLC7
5.35818744475263e-69	0.46980638182218	0.536	0.037	2.69999065341085e-65	RPA34
5.60227115393625e-69	-0.508575101243492	0.305	0.761	2.82298443446848e-65	CPR5
6.19764341927103e-69	-0.404828841773335	0.012	0.391	3.12299251897067e-65	UIP4
7.15247349990692e-69	-0.476801015616648	0.15	0.609	3.6041313966031e-65	MDM35
1.14487458397627e-68	-0.522383870425247	0.127	0.587	5.76902302865645e-65	UGA1
1.21309928199476e-68	0.475346150374297	0.513	0.02	6.11280728197159e-65	UTR2
5.25272362151468e-68	0.456318328404307	0.97	0.789	2.64684743288125e-64	IPP1
1.76613128260535e-67	-0.493172901118066	0.232	0.698	8.89953553304835e-64	COQ5
1.7763421476778e-67	-0.370108942426468	0.015	0.391	8.95098808214843e-64	HAP4
2.20675895234557e-67	-0.416757878513955	0.055	0.474	1.11198583608693e-63	OSW5
2.31014775136295e-67	-0.368278750228103	0.018	0.398	1.16408345191179e-63	GPM2
2.78989060398228e-67	-0.371326751300041	0.011	0.38	1.40582587534667e-63	GLG1
4.44793262252974e-67	0.53801649138535	0.7	0.209	2.24131324849274e-63	RPL31A
5.18315268785516e-67	0.475271328212643	0.64	0.139	2.61179063941021e-63	ILS1
7.15094594818981e-67	-0.399278425477588	0.001	0.354	3.60336166329285e-63	YIG1
8.62659568204687e-67	0.4462839902008	0.51	0.026	4.34694156418342e-63	PWP1
9.89563366291965e-67	-0.512440524258007	0.127	0.578	4.98640980274521e-63	LAP2
1.02377429953912e-66	-0.431387385230271	0.074	0.502	5.1587986953776e-63	CYC3
1.64081690414926e-66	-0.438694998057735	0.063	0.485	8.2680763800081e-63	APA2
2.73559710362796e-66	-0.356007519316951	0.011	0.376	1.37846738051813e-62	CBP4
3.93996651897677e-66	-0.419021377233258	0.054	0.465	1.98534912891239e-62	COA1
4.03346656515865e-66	0.480594323245476	0.789	0.307	2.03246380218344e-62	URA1
6.06261364598803e-66	0.453225169794341	0.511	0.03	3.05495101621337e-62	POL5
7.48677936345908e-66	-0.416305661189307	0.143	0.6	3.77258812124703e-62	MIC26
1.40265958573749e-65	-0.353117109138703	0.012	0.376	7.06800165253121e-62	SAF1
1.54501000635463e-65	0.468270689892651	0.528	0.043	7.785305422021e-62	PGA3
1.927868341993e-65	-0.428627729407512	0.034	0.422	9.71452857530273e-62	SNF11
2.71662652663327e-65	0.471117724412629	0.742	0.265	1.3689081067705e-61	ADO1
6.88193908257861e-65	-0.382133595467246	0.004	0.352	3.46780910371136e-61	DCI1
7.11844334374019e-65	-0.367270561370677	0.019	0.389	3.58698360091068e-61	COX8
8.23122844066943e-65	-0.522364390055186	0.148	0.589	4.14771601125332e-61	PET9
8.32600458230116e-65	0.426513216082392	0.478	0.011	4.19547370902155e-61	DBP3
1.00875856974007e-64	-0.496315268079797	0.35	0.767	5.08313443292021e-61	ACP1
1.56512751742341e-64	-0.41425314054627	0.073	0.493	7.88667756029657e-61	COA3
2.1034361211921e-64	-0.470864121492007	0.275	0.717	1.0599214614687e-60	YIP4
2.58620926027947e-64	0.437307778149249	0.491	0.022	1.30319084625482e-60	ESF1
5.33280886634913e-64	-0.508989734305638	0.231	0.678	2.68720238775333e-60	DAK1
5.81875551247024e-64	-0.386009314498421	0.031	0.411	2.93207090273375e-60	SOL2
7.0556216838658e-64	0.441904298653167	0.476	0.013	3.55532776649998e-60	ERB1
7.18272851826885e-64	0.482165430481494	0.553	0.072	3.61937690035567e-60	ELO2
1.52944833339603e-63	-0.364284892419026	0.015	0.374	7.70689015198259e-60	TPK2
1.57048008901963e-63	0.447758722482252	0.606	0.122	7.91364916856989e-60	YDJ1
3.23079572240027e-63	-0.396995362466083	0.073	0.485	1.6279979645175e-59	HRT3
7.91133407756281e-63	-0.440443024829806	0.13	0.567	3.9865212416839e-59	DID4
8.2216681200662e-63	-0.456372398846007	0.238	0.685	4.14289856570136e-59	APD1
8.96753013940553e-63	-0.361014284434683	0.001	0.335	4.51873843724645e-59	MAL11
1.35453005838627e-62	-0.35609758730834	0.043	0.433	6.82547696420841e-59	CMK2
1.40494466420116e-62	-0.362081378252975	0.023	0.389	7.07951616290965e-59	COX5A
2.2147235193718e-62	-0.375296908952241	0.045	0.43	1.11599918141145e-58	UBX3
5.84181596820568e-62	0.450799260250403	0.621	0.139	2.94369106637884e-58	DPH5
8.10307392394627e-62	0.415596110588746	0.479	0.022	4.08313895027653e-58	RPA43
1.27840287426685e-61	0.454142573639438	0.536	0.065	6.44187208343064e-58	APT1
1.99549491379678e-61	0.475346626116616	0.738	0.3	1.0055298870622e-57	GLN4
2.9576611558512e-61	-0.449131288440358	0.101	0.52	1.49036545643342e-57	EHT1
3.16266047272481e-61	-0.463690051943368	0.354	0.78	1.59366461220603e-57	LPD1
3.58695414032433e-61	0.409520572624983	0.52	0.052	1.80746619130943e-57	MDN1
4.14247985618127e-61	-0.364025518718345	0.027	0.389	2.08739559952974e-57	COX15
4.70352819185088e-61	-0.442578449472774	0.189	0.63	2.37010785587366e-57	SFT2
9.54327027645254e-61	-0.329286181361917	0.012	0.354	4.80885389230443e-57	RPM2
9.84718202606969e-61	-0.404625229994513	0.092	0.507	4.96199502293652e-57	KGD2
1.24973094352386e-60	0.450408122791425	0.587	0.117	6.29739422441673e-57	ARO2
1.71316773599107e-60	-0.45888812907907	0.157	0.585	8.63265222165899e-57	QRI5
2.24587193774561e-60	-0.469657948853961	0.354	0.776	1.13169486943001e-56	RIB5
2.40654934440477e-60	-0.366313746838842	0.061	0.454	1.21266021464556e-56	PEP12
6.59891511971639e-60	-0.361935577433307	0.036	0.404	3.32519332882509e-56	VTI1
6.91022787947421e-60	0.433710776783288	0.522	0.063	3.48206382846705e-56	NIP7
9.48797432840842e-60	-0.44476829690135	0.076	0.47	4.78099026408501e-56	PPM1
1.13061219519533e-59	-0.393996015644691	0.07	0.465	5.69715485158924e-56	IRC24
1.68028450762357e-59	-0.451073522617873	0.081	0.48	8.46695363391519e-56	DLD1
1.76667310013318e-59	-0.350769450524732	0.088	0.498	8.90226575157108e-56	PAM1
2.12301378633907e-59	-0.349840459415477	0.004	0.326	1.06978664693626e-55	FMP45
5.43006388926949e-59	0.417878528259146	0.934	0.698	2.7362091938029e-55	ARF1
6.06762349691764e-59	-0.37016761507736	0.046	0.42	3.0574754800968e-55	PRB1
6.11080878263028e-59	-0.388241269420255	0.051	0.428	3.0792365455674e-55	LYS5
2.84518432383406e-58	-0.417511490623054	0.202	0.63	1.43368838077998e-54	RVS161
6.99832937429327e-58	-0.362771423891113	0.043	0.409	3.52645817170638e-54	MMT2
9.81748810293321e-58	0.453318206292187	0.752	0.343	4.94703225506804e-54	THR4
1.64610018822933e-57	-0.403954149045149	0.123	0.535	8.2946988484876e-54	DAP1
2.04349472624803e-57	0.434088752904567	0.444	0.015	1.02971699255638e-53	RPS9A
2.28929963613598e-57	-0.397482563385653	0.096	0.493	1.15357808664892e-53	CDC55
2.65380373741537e-57	-0.305435107351096	0.009	0.33	1.33725170328361e-53	EMP46
2.70010795238018e-57	0.402307953268573	0.479	0.039	1.36058439720437e-53	DBP9
2.78993077884859e-57	-0.373585192269334	0.04	0.4	1.4058461194618e-53	MPO1
6.55756424025966e-57	-0.337681957781894	0.043	0.404	3.30435662066684e-53	ALT2
9.88065145844653e-57	-0.325705042646132	0.016	0.346	4.97886026991121e-53	GGA1
1.0792156815128e-56	-0.326046053283697	0.005	0.317	5.43816781914302e-53	REG2
1.19182658044044e-56	-0.356421224534169	0.081	0.47	6.00561413883938e-53	XDJ1
1.23834147818644e-56	-0.508188505791234	0.378	0.787	6.24000270858148e-53	ERG28
1.34784893990302e-56	-0.49785708809797	0.163	0.578	6.79181080817132e-53	GCV2
1.36126504390972e-56	-0.373927320058709	0.067	0.448	6.85941455626107e-53	PBN1
1.38030299159993e-56	0.404664104602583	0.453	0.024	6.95534677467206e-53	FPR4
1.41801746681482e-56	-0.497690105143382	0.522	0.854	7.1453900152799e-53	HMO1
1.76437216301315e-56	0.398780634364031	0.456	0.026	8.89067132942324e-53	RRB1
1.80321827115668e-56	0.430678533232362	0.467	0.035	9.08641686835851e-53	ARX1
1.80409819613507e-56	-0.409738766558044	0.313	0.735	9.09085081032462e-53	SAC6
1.88679338390325e-56	-0.393788262915463	0.111	0.515	9.50755186148845e-53	UBP15
2.65790207942749e-56	-0.442451099455391	0.451	0.815	1.33931685782351e-52	CLC1
3.41378032252037e-56	-0.363927201320699	0.05	0.415	1.72020390451802e-52	MPC1
4.13241458637762e-56	-0.861410241540652	0.003	0.307	2.08232371007568e-52	SIP18
4.53811661353832e-56	-0.361804757717445	0.061	0.435	2.28675696156196e-52	MIC12
4.90360849404836e-56	-0.372787264788275	0.116	0.522	2.47092832015097e-52	LSB5
5.40238466767983e-56	-0.555504286335982	0.475	0.809	2.72226163404387e-52	ITR1
6.30898523401568e-56	0.413917771471237	0.505	0.063	3.1790976594205e-52	HAS1
7.86262709345616e-56	-0.436110988023871	0.212	0.635	3.96197779239256e-52	PDX3
8.23454467732636e-56	0.39297104363468	0.435	0.015	4.14938706290475e-52	KAP123
1.06718944730196e-55	-0.28920083928731	0.003	0.304	5.37756762495459e-52	RTC2
1.11686431814902e-55	-0.361817891888707	0.058	0.426	5.62787929915291e-52	ESL2
1.74468295517038e-55	-0.321983876920612	0.022	0.352	8.79145741110353e-52	PET100
1.8458012428819e-55	-0.377424035197429	0.092	0.483	9.3009924628819e-52	DGA1
2.13183875112724e-55	0.420727849223148	0.472	0.043	1.07423354669302e-51	KRR1
4.4402206788902e-55	0.402107211537995	0.938	0.761	2.23742720009277e-51	EGD1
1.10113155702353e-54	0.485559381145926	0.582	0.135	5.54860191584156e-51	GAS1
1.27660460133601e-54	-0.290991404830402	0	0.291	6.43281058613213e-51	CRC1
1.78567983109779e-54	0.42198381314878	0.574	0.124	8.99804066890175e-51	URA2
2.27561764258372e-54	-0.406652992207729	0.065	0.428	1.14668373009794e-50	ACO1
2.51517932924012e-54	-0.350834098905311	0.046	0.398	1.2673988640041e-50	SDH7
3.98235214538861e-54	-0.98014781083764	0.594	0.891	2.00670724606132e-50	HHT2
4.90437483870502e-54	-0.393927258645186	0.111	0.507	2.47131448122346e-50	CUP9
5.40791176708269e-54	-0.36217942401646	0.754	0.963	2.72504673943297e-50	SBA1
5.85271490970684e-54	-0.411125001192033	0.285	0.702	2.94918304300128e-50	CAP2
7.44336155415826e-54	-0.320732931994772	0.022	0.343	3.75070988714035e-50	PSK1
8.00248254885494e-54	-0.351005204917876	0.072	0.441	4.032450956368e-50	HEM15
9.81535809149489e-54	0.39876270610999	0.598	0.154	4.94595894230428e-50	ASP1
1.00271793660061e-53	-0.328892066140373	0.005	0.302	5.05269568253049e-50	TPO4
1.12641473893394e-53	-0.354449527413377	0.078	0.452	5.67600386948813e-50	SNX4
1.88953723001805e-53	-0.451351632640348	0.232	0.637	9.52137810206096e-50	RHO5
2.40589287514017e-53	0.399569090327761	0.447	0.033	1.21232941978313e-49	LIA1
2.78309811314597e-53	-0.764080944455155	0.013	0.32	1.40240313921426e-49	ADH2
4.17548330683468e-53	-0.366989130221206	0.096	0.476	2.104026038314e-49	AFG1
1.45308189475854e-52	-0.401294127581805	0.228	0.635	7.32207966768828e-49	YPT52
1.46113050526054e-52	0.425802059269276	0.852	0.52	7.36263661600785e-49	SUI3
1.54426411253525e-52	-0.324287024627529	0.007	0.3	7.78154686306512e-49	MAL33
2.22763778258328e-52	0.397413613274846	0.457	0.043	1.12250667864371e-48	ARO4
2.3701275094846e-52	0.433709387170389	0.516	0.087	1.19430725202929e-48	HPT1
3.03628589740804e-52	-0.357035466950769	0.051	0.398	1.52998446370391e-48	RCF1
4.23524849485872e-52	0.38622362173534	0.444	0.035	2.13414171655931e-48	INA1
4.42287783923034e-52	0.410140755793607	0.63	0.198	2.22868814318817e-48	SAH1
6.96405689010395e-52	0.394663621812916	0.498	0.074	3.50918826692338e-48	RPC40
8.16950836028833e-52	-0.396806408938987	0.22	0.63	4.11661526274929e-48	MGR2
2.74261987768037e-51	-0.370605688288147	0.074	0.433	1.38200615636314e-47	DSD1
3.68725483818139e-51	-0.39941185072398	0.179	0.576	1.8580077129596e-47	GRX5
4.65684606445884e-51	-0.331561227272254	0	0.274	2.34658473188081e-47	MAL63
5.71851141642885e-51	0.359879376697899	0.385	0.002	2.8815579027385e-47	DRS1
6.44163719740978e-51	0.368028237226875	0.414	0.02	3.24594098377479e-47	RRS1
1.02522869877799e-50	-0.408909255947873	0.152	0.541	5.16612741314228e-47	MSS4
1.2562092189881e-50	0.357505712628912	0.413	0.02	6.33003825448102e-47	RBG1
1.77419895434073e-50	-0.323430888607756	0.045	0.376	8.94018853092295e-47	SLM1
2.39271024243894e-50	0.368186500996236	0.426	0.03	1.20568669116498e-46	RLP24
2.41337936853829e-50	-0.313793889719028	0.03	0.346	1.21610186380645e-46	UPS1
3.59694578904288e-50	-0.338172262930074	0.05	0.385	1.81250098309871e-46	SML1
5.42144871323459e-50	-0.306328149264652	0.018	0.315	2.73186800659891e-46	TES1
5.93141508938471e-50	-0.280541338234732	0.003	0.276	2.98884006354095e-46	LEE1
6.49513135944005e-50	-0.300858167798971	0.011	0.298	3.27289669202184e-46	ESBP6
7.04365180826528e-50	-0.481265132439466	0.182	0.567	3.54929614618487e-46	PHD1
8.10972441253924e-50	0.39276548704586	0.514	0.098	4.08649013147852e-46	NHP2
8.48655464303935e-50	-0.325730612216384	0.043	0.37	4.27637488462753e-46	ENT2
8.78548322817345e-50	0.383590514625748	0.502	0.091	4.4270049986766e-46	MES1
8.94412258848312e-50	-0.31913404603141	0.009	0.293	4.50694337233664e-46	NRG1
9.68456472283025e-50	0.35499414317981	0.395	0.013	4.88005216383416e-46	EBP2
1.03414254517289e-49	-0.596356741139678	0.478	0.796	5.21104428512621e-46	REE1
1.21690607567579e-49	-0.310356023426577	0.954	0.993	6.13198971533031e-46	COF1
1.22169013071124e-49	-0.312914067536544	0.039	0.365	6.15609656865394e-46	STR2
1.9118501145759e-49	0.361097932540253	0.401	0.017	9.63381272734795e-46	NOP4
2.18120650495935e-49	0.362450666783856	0.484	0.072	1.09910995784902e-45	FAA4
2.40132385859337e-49	-0.368853036618221	0.14	0.52	1.2100270923452e-45	ATP14
2.85089501746329e-49	0.418540900885611	0.707	0.304	1.43656599929975e-45	MAP1
3.94064517989057e-49	-0.27171964249426	0.012	0.298	1.98569110614686e-45	SRY1
4.18820227912192e-49	-0.372690343229239	0.192	0.585	2.11043512844953e-45	YIP5
1.01602429359543e-48	-0.34489131742473	0.753	0.963	5.11974641542739e-45	PDA1
1.06200595823714e-48	-0.408654194096765	0.189	0.57	5.35144802355695e-45	MIX17
1.201113469228e-48	-0.281496330532695	0.028	0.335	6.05241077143991e-45	GYP7
2.51762026451206e-48	-0.310339070143434	0.023	0.32	1.26862885128763e-44	SUR1
3.06663716980546e-48	-0.390671668923	0.157	0.533	1.54527846986497e-44	AIM6
3.67175485561148e-48	-0.323090971282036	0.061	0.396	1.85019727174262e-44	DSC2
4.41992663608329e-48	-0.387286715920719	0.115	0.48	2.22720103192237e-44	COS1
4.61706532523056e-48	-0.29369358977677	0.04	0.359	2.32653921738368e-44	SIP5
5.15921162600079e-48	-0.405700900984938	0.277	0.663	2.5997267383418e-44	GLR1
7.0231286853752e-48	-0.345200426517082	0.015	0.298	3.53895454456056e-44	YAT2
7.77575598547322e-48	-0.388094852378584	0.25	0.641	3.91820344107996e-44	MIM1
8.33095613429847e-48	-0.285379128150393	0.02	0.311	4.197968796073e-44	AIM39
8.84242032841195e-48	-0.310406426434333	0.024	0.32	4.45569560348678e-44	RTK1
9.01573169483711e-48	-0.300186750023421	0.038	0.35	4.54302720102842e-44	CST6
1.08833891854225e-47	-0.387421356911465	0.14	0.511	5.48413981053439e-44	MXR2
1.12149184319544e-47	-0.305790886807735	0.028	0.328	5.65119739786182e-44	GPA2
1.48357165333382e-47	-0.268691448051035	0.005	0.272	7.4757175611491e-44	PHM8
1.62345394299012e-47	-0.382199018047932	0.174	0.557	8.1805844187272e-44	LEU4
8.38054125748082e-47	0.378789205314392	0.54	0.137	4.22295473964458e-43	ALA1
8.95287591948409e-47	-0.338021320439178	0.077	0.415	4.51135417582803e-43	SWS2
9.09926983563693e-47	0.375524096865569	0.56	0.152	4.58512207017745e-43	FRS1
9.20718138556029e-47	-0.35709739809106	0.109	0.467	4.63949870018383e-43	PHO85
1.00091627920404e-46	0.375860454586158	0.503	0.102	5.04361713090915e-43	RPB5
1.07828924972996e-46	0.373525463843327	0.623	0.22	5.43349952938928e-43	RPO26
1.38101651428243e-46	-0.278631203709851	0.004	0.263	6.95894221546917e-43	HBT1
4.71130023319136e-46	0.343416913377538	0.416	0.039	2.37402418750513e-42	ALB1
5.09316671979421e-46	0.362064542118773	0.386	0.02	2.5664467101043e-42	AAH1
8.92098692862711e-46	0.333714333322532	0.393	0.026	4.4952853133352e-42	NOP12
9.4539868925439e-46	-0.298228719501487	0.03	0.322	4.76386399515287e-42	VID30
1.05498359428752e-45	-0.403510309773492	0.232	0.602	5.31606233161482e-42	APE2
1.99300701026337e-45	0.385727929640453	0.432	0.054	1.00427623247171e-41	YHB1
3.0413719965991e-45	-0.356649087695271	0.12	0.48	1.53254734908629e-41	AVT7
3.84291906634506e-45	-0.266483846425847	0.018	0.291	1.93644691753127e-41	GAT2
3.98262253254433e-45	0.403737086263295	0.622	0.233	2.00684349414909e-41	CCT4
4.93018491052637e-45	-0.319684989785826	0.026	0.309	2.48432017641424e-41	LPX1
7.15191131152796e-45	0.371314650585857	0.501	0.109	3.60384810987894e-41	ASN2
8.36814023932071e-45	-0.321105187043022	0.065	0.387	4.21670586659371e-41	DUF1
1.12080092368452e-44	-0.310316261821295	0.08	0.413	5.6477158544463e-41	AHC1
1.1424298807801e-44	0.39355456972459	0.703	0.326	5.75670416925091e-41	SUP45
1.54213305693327e-44	-0.318078717915697	0.09	0.43	7.77080847388674e-41	MRPL28
1.8340364627044e-44	-0.284559925566864	0.038	0.333	9.24170973556746e-41	PMC1
2.05528590160184e-44	-0.301308492532155	0.054	0.365	1.03565856581717e-40	IKS1
2.66849630119454e-44	0.334211587769916	0.399	0.035	1.34465528617193e-40	YTM1
2.95959590442373e-44	-0.316209869784545	0.07	0.393	1.49134037623912e-40	MSC3
4.62940074444813e-44	-0.290879210300413	0.032	0.32	2.33275503512741e-40	LEU1
4.71019362194425e-44	-0.392414505609336	0.213	0.576	2.37346656609771e-40	MMS2
5.23418768076302e-44	0.340451351324931	0.389	0.03	2.63750717233649e-40	NCL1
5.24769283035439e-44	0.368752715258834	0.424	0.052	2.64431241721558e-40	PMA1
6.48582604305446e-44	-0.354173914266688	0.123	0.472	3.26820774309514e-40	PGC1
6.72584051325216e-44	0.370456631045055	0.516	0.133	3.38915103462776e-40	VAS1
1.12581447936804e-43	0.347238093609878	0.437	0.063	5.67297916153557e-40	RPL22B
1.13693059204297e-43	-0.386552028616617	0.215	0.583	5.72899325330452e-40	MIC10
1.25507695612456e-43	0.383636942873289	0.671	0.298	6.32433278191163e-40	RPL36A
1.62299002429627e-43	0.366765295864176	0.611	0.22	8.17824673242888e-40	RPG1
1.90198719482577e-43	0.364157572307479	0.498	0.115	9.58411347472704e-40	TIF5
3.62110624926877e-43	0.383923462461508	0.746	0.389	1.82467543900653e-39	ENB1
3.65118561075025e-43	-0.310701200129411	0.093	0.426	1.83983242925705e-39	KEG1
5.48239985353052e-43	0.319843240188385	0.379	0.028	2.76258128619403e-39	IMP4
7.40433162745046e-43	0.343911805904742	0.565	0.176	3.73104270707229e-39	GIS2
9.63715021015237e-43	0.372505011786331	0.603	0.23	4.85615999089578e-39	HTS1
1.08579509952663e-42	-0.252712388773087	0.022	0.289	5.4713215065147e-39	LDH1
1.18851875705211e-42	-0.295049156573488	0.049	0.346	5.9889460167856e-39	PEX5
1.43383832180291e-42	-0.355012579294336	0.121	0.463	7.22511130356485e-39	YFH1
1.62109758822209e-42	-0.269092700032372	0.047	0.343	8.16871074705114e-39	INA17
1.76646512774049e-42	-0.267553866965437	0.013	0.267	8.90121777868431e-39	GIS1
2.17388779697046e-42	-0.391901737271305	0.348	0.698	1.09542206089342e-38	LAP3
2.3112928320167e-42	-0.325164632826102	0.058	0.361	1.16466045805321e-38	PEX11
2.38229727740408e-42	-0.349836930949277	0.124	0.463	1.20043959808391e-38	OSH2
2.83868088438498e-42	-0.38138101625509	0.255	0.6	1.43041129764159e-38	BBC1
2.85135230130172e-42	-0.321272489063499	0.113	0.45	1.43679642462594e-38	GSF2
3.06993792536009e-42	-0.279839949111092	0.023	0.289	1.54694172058895e-38	BNS1
4.01644645216389e-42	-0.384359441180899	0.291	0.654	2.02388736724539e-38	SSP120
4.11165422873581e-42	-0.447761981488541	0.073	0.383	2.07186256585997e-38	MET6
5.26717931723173e-42	-0.351228147798565	0.85	0.952	2.65413165795307e-38	GCN4
6.22802269550205e-42	-0.326521989328315	0.099	0.426	3.13830063626348e-38	ISA2
6.23844690230807e-42	0.367402507666471	0.437	0.072	3.14355339407304e-38	ECM33
6.28233775782093e-42	-0.255649429549093	0.03	0.304	3.16566999616597e-38	COX16
8.4029054304112e-42	-0.281520258091649	0.04	0.326	4.23422404638421e-38	ALD2
1.15578869739735e-41	-0.295819567313343	0.073	0.387	5.82401924618524e-38	RSM7
1.31044878024648e-41	-0.321364043075631	0.099	0.424	6.60335140366201e-38	MRPL23
1.33858640673032e-41	-0.369284476844183	0.314	0.657	6.74513690351409e-38	RAS2
3.22629948541556e-41	0.315814828436717	0.366	0.026	1.6257323107009e-37	NPA3
3.32342129901527e-41	0.363569290970465	0.727	0.409	1.67467199257379e-37	ARC1
3.96993642945651e-41	0.327038183189804	0.367	0.028	2.00045096680314e-37	SDA1
5.19056762097556e-41	-0.345446816669503	0.165	0.509	2.61552702420958e-37	MRP7
6.08264420409213e-41	-0.296776833753846	0.061	0.359	3.06504441444202e-37	MRP49
7.32078718253079e-41	-0.367189333766708	0.3	0.654	3.68894466127727e-37	CAP1
7.4286407946284e-41	-0.286758921711483	0.099	0.422	3.74329209641325e-37	IRA2
8.66138917003035e-41	-0.303721338423189	0.077	0.387	4.36447400277829e-37	UBC5
1.05587185419209e-40	-0.293045235392977	0.047	0.333	5.32053827327395e-37	HMRA1
1.77241444183058e-40	0.353343168263548	0.514	0.146	8.93119637238429e-37	FAS2
2.20614166272318e-40	0.30793511897243	0.378	0.037	1.11167478384621e-36	SQT1
2.31130298346875e-40	-0.309864126400844	0.103	0.426	1.1646655733699e-36	CAB5
2.33796114414686e-40	-0.258757173855402	0.034	0.304	1.1780986205356e-36	ATG20
2.35505941537391e-40	0.37650242131237	0.537	0.167	1.18671443940691e-36	MVD1
2.55574745007273e-40	-0.348433670074347	0.302	0.648	1.28784114009165e-36	RVS167
3.63959254402213e-40	-0.318961502774504	0.089	0.402	1.83399068293275e-36	ERP3
4.38245518454738e-40	-0.355821791549282	0.348	0.689	2.20831916749342e-36	LAT1
4.6917574314639e-40	-0.321122866682101	0.081	0.389	2.36417656971466e-36	MRPS9
6.0142471588348e-40	-0.331921810772539	0.124	0.45	3.03057914333686e-36	MHR1
8.30459574867715e-40	-0.284935124357143	0.059	0.352	4.18468579775841e-36	PCL7
1.05972606610557e-39	0.363517694910029	0.352	0.024	5.33995964710599e-36	EXG1
1.66233434225579e-39	0.580819213020801	0.439	0.091	8.37650275062695e-36	PHO11
1.78733034541283e-39	-0.265920701157239	0.063	0.361	9.00635761053527e-36	PEX2
1.80521330866019e-39	-0.288684827476502	0.085	0.393	9.09646986233871e-36	MNR2
1.84836485319612e-39	0.302344589758204	0.351	0.024	9.31391049525523e-36	MAK21
2.61731929039986e-39	0.323606502035173	0.359	0.03	1.31886719043249e-35	TRM8
2.72859904070505e-39	0.360212492124131	0.536	0.176	1.37494105661127e-35	ACC1
2.99070849065697e-39	0.307573793422743	0.387	0.048	1.50701800844205e-35	RPA12
3.40349412945861e-39	-0.261632413463866	0.03	0.289	1.71502069183419e-35	SOL1
3.54226596545936e-39	-0.287842136210107	0.099	0.417	1.78494781999497e-35	BRO1
3.64576577982911e-39	0.368560532454603	0.618	0.254	1.83710137645589e-35	VTC4
3.7573031371086e-39	0.306490447613214	0.325	0.011	1.89330505078902e-35	NOP6
4.63118314230713e-39	0.371544483245285	0.636	0.289	2.33365318540856e-35	TIF2
4.64372306546568e-39	-0.326476753459014	0.058	0.343	2.33997205268816e-35	GAT1
6.1168818698727e-39	-0.285585229313018	0.067	0.363	3.08229677422885e-35	MAG1
8.34622986850558e-39	-0.354208049132676	0.269	0.615	4.20566523073996e-35	GTS1
8.38277789767039e-39	0.292969829324689	0.331	0.015	4.22408178263611e-35	MRD1
1.06004915879649e-38	-0.259728739053938	0.036	0.302	5.3415877111755e-35	HYM1
1.19119332185045e-38	0.327276997454744	0.382	0.048	6.00242314880442e-35	TMA46
1.51487926164041e-38	0.285725874253511	0.317	0.009	7.63347659940602e-35	NOG1
1.54043696673677e-38	-0.259197890034059	0.047	0.322	7.76226187538659e-35	CTH1
1.94809945082833e-38	0.327689899239069	0.409	0.065	9.81647313272395e-35	SCP160
2.64604104235312e-38	-0.361217540132606	0.377	0.691	1.33334008124174e-34	ARC40
3.19511657254066e-38	0.291150873131841	0.331	0.017	1.61001924090324e-34	HMT1
3.45973220220981e-38	-0.287642769629831	0.074	0.37	1.74335905669352e-34	HSM3
3.87211555192761e-38	0.291136598269543	0.318	0.011	1.95115902661632e-34	PUF6
4.2083109597721e-38	-0.291132303819318	0.084	0.383	2.12056789262916e-34	COA6
6.38193281571139e-38	-0.318698855539678	0.127	0.446	3.21585594583697e-34	MSS51
6.55017236559223e-38	-0.33090378868118	0.445	0.759	3.30063185502193e-34	RPN12
9.25182924650585e-38	0.356844508087557	0.702	0.372	4.6619967573143e-34	TIF34
9.98387729027744e-38	-0.333528657393004	0.441	0.765	5.0308757665708e-34	ABF2
1.17857839737391e-37	0.294310329732747	0.331	0.02	5.93885654436711e-34	RRP8
1.22997014204714e-37	-0.345445138370725	0.173	0.502	6.19781954577556e-34	ADE8
1.31678443903026e-37	0.28549411987148	0.327	0.017	6.6352767882735e-34	RPA49
1.72478653772881e-37	0.340161511449814	0.737	0.402	8.69119936361547e-34	FPR3
1.89123298906063e-37	-0.316617638140729	0.022	0.261	9.52992303187651e-34	PCK1
1.891526823987e-37	-0.267158681027204	0.062	0.346	9.53140366607049e-34	TPS3
1.89415134286598e-37	0.280982603043013	0.632	0.243	9.54462861670165e-34	HXT3
3.4414612657423e-37	-0.344535717417918	0.239	0.574	1.73415233180755e-33	CSG2
4.57574265580909e-37	-0.318926901512792	0.19	0.517	2.3057167242622e-33	ORM2
4.62655816500065e-37	0.290886436033047	0.341	0.028	2.33132265934383e-33	RPA135
4.62663885981269e-37	-0.268577144355087	0.053	0.324	2.33136332145962e-33	KIN1
4.76231350232972e-37	-0.265668477824455	0.04	0.3	2.39972977382395e-33	ECM38
5.33792274571719e-37	-0.311169191024385	0.131	0.446	2.68977927156689e-33	FIS1
5.87604556367621e-37	-0.299533166273211	0.097	0.398	2.96093935953644e-33	FAD1
6.5730817793752e-37	-0.282544657086894	0.062	0.341	3.31217590862717e-33	MHF1
6.95093119672237e-37	-0.296542617504601	0.121	0.437	3.5025742300284e-33	CUE5
1.01778578389197e-36	0.285550489489585	0.309	0.011	5.12862256503165e-33	RPA190
1.05156862292653e-36	0.283007566518367	0.332	0.024	5.2988542909268e-33	ENP2
1.2552395367517e-36	0.291275839881292	0.324	0.02	6.32515202569181e-33	ENP1
1.27672869067148e-36	-0.288174964583287	0.058	0.333	6.43343587229358e-33	MDH2
1.45469347025115e-36	-0.281762913731881	0.022	0.257	7.33020039659554e-33	SED1
1.46076565912113e-36	-0.278593485508438	0.005	0.215	7.36079815631136e-33	PTR2
1.74891159348298e-36	-0.318946637041997	0.497	0.783	8.81276551956075e-33	RPN5
1.80013680415417e-36	0.34839257665828	0.514	0.167	9.07088935613287e-33	RPL9B
1.81442798655637e-36	-0.331056037999578	0.144	0.459	9.14290262425753e-33	AIM7
2.328205666157e-36	0.296807006381508	0.314	0.015	1.17318283517651e-32	TSR2
2.54791240162205e-36	0.312030290489494	0.464	0.12	1.28389305917735e-32	PRT1
3.10869128613475e-36	0.283092695081026	0.347	0.035	1.5664695390833e-32	HCA4
3.3012654786029e-36	-0.251411655709577	0.062	0.339	1.663507674668e-32	GPR1
4.40155973847035e-36	0.28162155216137	0.339	0.03	2.21794595221521e-32	UTP15
4.84675269814986e-36	0.34610106364599	0.775	0.483	2.44227868459771e-32	ERG4
4.86849686099298e-36	0.300160477221092	0.32	0.02	2.45323556825436e-32	TSR1
5.13442539085835e-36	-0.290621794483716	0.891	0.967	2.58723695445352e-32	BMH1
5.58217722020399e-36	-0.31264247585726	0.491	0.802	2.81285910126079e-32	CAM1
6.17308134771377e-36	0.276894628176971	0.308	0.013	3.11061569111297e-32	RPC31
6.30053868094731e-36	-0.338748900978822	0.143	0.452	3.17484144132935e-32	MIA40
6.82038331997299e-36	-0.316617061939047	0.248	0.585	3.43679115493439e-32	ADE2
7.11697764961209e-36	-0.298661405296957	0.115	0.422	3.58624503763953e-32	PHB2
7.65432711451588e-36	-0.307564702157643	0.163	0.487	3.85701543300455e-32	ENT3
8.61956455045091e-36	-0.285014372833273	0.082	0.37	4.34339857697221e-32	RSM19
8.96305400857875e-36	-0.293891565953886	0.073	0.352	4.51648291492283e-32	TIM9
1.05938941606584e-35	-0.287912510646969	0.134	0.446	5.33826326755579e-32	RPN4
1.06084343966228e-35	-0.498611239104484	0.2	0.513	5.34559009245823e-32	PUN1
1.34043166083237e-35	0.278809414401332	0.329	0.026	6.75443513893433e-32	KEL3
1.60661286228491e-35	-0.267530191754335	0.073	0.354	8.09572221305364e-32	PEX30
1.76214108070229e-35	0.296991496355728	0.32	0.022	8.87942890565886e-32	DIM1
1.84117425511786e-35	0.293211436691568	0.347	0.037	9.27767707153891e-32	LTV1
2.11860323388609e-35	-0.332605228877052	0.22	0.548	1.0675641695552e-31	BNA6
2.2618101989291e-35	0.263687622819162	0.312	0.017	1.13972615924037e-31	EFM4
2.37424805944252e-35	-0.312803257494719	0.093	0.385	1.19638359715308e-31	HBN1
2.44843336256997e-35	-0.272346472937672	0.078	0.363	1.23376557139901e-31	IST1
2.45040647399585e-35	-0.338548112288781	0.39	0.707	1.23475982224651e-31	PDB1
2.99045757283549e-35	-0.262482259616731	0.053	0.315	1.5068915709518e-31	MRPL39
3.39841522415362e-35	-0.385450173865589	0.314	0.646	1.71246143145101e-31	ELO1
5.22374563542288e-35	0.314148437058064	0.764	0.415	2.63224542568959e-31	ERG25
5.90342402415277e-35	-0.280805649743749	0.073	0.35	2.97473536577058e-31	LPL1
5.93124959367253e-35	0.27371659249222	0.305	0.015	2.98875667025159e-31	NEW1
8.95805551853141e-35	-0.310206744276488	0.25	0.583	4.51396417578798e-31	TPD3
9.96691276854021e-35	-0.354419536660238	0.206	0.515	5.02232734406741e-31	YSA1
1.12867160030517e-34	0.285213125286348	0.336	0.035	5.68737619393774e-31	GCD10
1.53191179103746e-34	-0.331278792845137	0.312	0.626	7.71930351503774e-31	KRE1
1.59754807888046e-34	-0.31200535431362	0.119	0.417	8.05004476947862e-31	NCR1
1.63889926881114e-34	0.295547874409067	0.328	0.03	8.25841341553931e-31	TPA1
1.87462583757038e-34	-0.319203678998571	0.421	0.724	9.44623959551715e-31	PPN1
1.90094677887803e-34	0.25845951282087	0.291	0.009	9.57887081876638e-31	UTP21
2.54969278504202e-34	0.286427601564637	0.924	0.767	1.28479019438267e-30	RPS21A
3.83624714327421e-34	0.269273201896786	0.291	0.011	1.93308493549588e-30	NOP13
6.22908960158553e-34	-0.258679391571346	0.094	0.383	3.13883825023895e-30	MGT1
7.42794537295549e-34	0.298259799209618	0.441	0.115	3.74294167343227e-30	RPL1B
8.52751230911521e-34	-0.293491750631014	0.155	0.463	4.29701345256316e-30	YJU3
1.19210352961451e-33	0.28281207018781	0.351	0.048	6.00700968572753e-30	TSR4
1.55021402858263e-33	-0.307275268217409	0.157	0.463	7.81152849002787e-30	SNX3
1.92931388588015e-33	-0.297422368092386	0.14	0.441	9.72181267095009e-30	DDP1
2.86485491439741e-33	-0.309731988248178	0.231	0.552	1.44360039136486e-29	MDY2
2.97553664991097e-33	-0.259631294557172	0.078	0.35	1.49937291789014e-29	PET123
3.49932443383669e-33	-0.252342839539567	0.061	0.32	1.76330958221031e-29	PAH1
3.71808546294917e-33	0.291227097655631	0.433	0.111	1.87354326478008e-29	RPL1A
3.94228273826068e-33	-0.285441672915608	0.123	0.415	1.98651627180956e-29	ADP1
7.01897288330741e-33	-0.286227714752809	0.197	0.515	3.5368604358986e-29	STP3
7.2888111769469e-33	0.273895469187261	0.325	0.035	3.67283195206354e-29	SOF1
8.51382453790021e-33	0.253077062566725	0.294	0.017	4.29011618464791e-29	UTP10
8.78030536956649e-33	0.290750132472484	0.352	0.052	4.42439587572455e-29	FKS1
1.0004824872516e-32	-0.250052300022169	0.039	0.274	5.04143125326079e-29	APL1
1.05900035009735e-32	-0.319984603022339	0.409	0.7	5.33630276414054e-29	RPN8
1.27230664654853e-32	-0.315403396973282	0.216	0.528	6.41115319195804e-29	TRP1
1.46450443386869e-32	0.304842815893345	0.807	0.557	7.37963784226434e-29	GUS1
1.83379793312491e-32	-0.306391323484139	0.169	0.472	9.24050778501644e-29	AIM2
2.03647764099693e-32	0.277889194261165	0.397	0.085	1.02618108329835e-28	MAK11
2.28776291696018e-32	-0.252825196571851	0.085	0.357	1.15280373385624e-28	PEX3
2.33871715700923e-32	0.361107644117202	0.409	0.091	1.17847957541695e-28	HPF1
3.301663764542e-32	-0.31055323988968	0.895	0.972	1.66370837095271e-28	MMF1
3.31521332690912e-32	0.329255012337664	0.66	0.37	1.67053599542951e-28	GUK1
3.71859295646972e-32	-0.254878269263883	0.011	0.207	1.87379899076509e-28	CRF1
3.91693526009611e-32	-0.292139763837295	0.227	0.546	1.97374367756243e-28	GRH1
4.24332187766812e-32	0.285892914763071	0.34	0.048	2.13820989415696e-28	TAT1
4.73075586692087e-32	0.259159837443952	0.293	0.02	2.38382788134143e-28	PRP43
4.75436562128782e-32	0.29980305046451	0.487	0.163	2.39572483656693e-28	RPB8
5.25769885934422e-32	0.253217922977379	0.285	0.015	2.64935445522355e-28	KRE33
5.28525352898464e-32	0.250151835826557	0.285	0.015	2.66323925325536e-28	NOC2
5.51296190341102e-32	0.330471349299227	0.622	0.302	2.77798150312882e-28	FAS1
5.68907124801651e-32	-0.301775806250279	0.165	0.465	2.86672300187552e-28	ARC35
5.77324086850534e-32	0.277016118936481	0.3	0.024	2.90913607363984e-28	ALD5
7.50392729501066e-32	-0.262947304168963	0.139	0.435	3.78122896395587e-28	VPS27
9.40000950432314e-32	0.269923580331211	0.385	0.078	4.73666478922843e-28	EFT1
1.21897577294302e-31	-0.259546749739508	0.073	0.33	6.14241891985986e-28	SYP1
1.34248402714955e-31	0.321321619258018	0.406	0.089	6.76477701280657e-28	TIR1
1.41660905624847e-31	0.256825028082015	0.298	0.024	7.13829303443603e-28	SAS10
2.70445947142929e-31	0.250825780778277	0.277	0.013	1.36277712765322e-27	UTP8
3.18813314128367e-31	-0.255676729605794	0.045	0.276	1.60650028989284e-27	SAP155
3.30361160963904e-31	0.267555012305622	0.309	0.033	1.66468989009711e-27	NSA2
3.34431771683092e-31	-0.298349755270634	0.204	0.507	1.6852016975111e-27	PAM17
4.16169264136246e-31	-0.289505196291865	0.134	0.42	2.09707692198254e-27	AIM29
4.86978446784717e-31	-0.252410453245788	0.059	0.304	2.45388439334819e-27	ATG21
6.97507969800509e-31	0.325302124664387	0.487	0.172	3.51474265982476e-27	VRG4
7.68389718151379e-31	-0.302917025953332	0.333	0.643	3.8719157897648e-27	ARP2
9.62325068394346e-31	0.302810760918767	0.412	0.107	4.84915601963911e-27	ILV1
9.95739767300221e-31	-0.315561070995211	0.09	0.352	5.01753268742581e-27	GDH3
1.08807463402726e-30	0.310970498375625	0.513	0.196	5.48280808086335e-27	PGA2
1.12425422841072e-30	0.287581606596157	0.879	0.657	5.6651170569616e-27	RTN1
1.53497743607801e-30	-0.279105799443932	0.177	0.476	7.7347513003971e-27	TWF1
1.58521137064435e-30	-0.253947160988295	0.07	0.32	7.98788009667686e-27	APM1
2.04029921057518e-30	-0.28462930913559	0.127	0.407	1.02810677220883e-26	ROY1
2.66326639088932e-30	-0.289098985958614	0.691	0.865	1.34201993436913e-26	YPT1
3.24207395975242e-30	-0.260188878237673	0.089	0.352	1.63368106831924e-26	FMP27
3.94642343188558e-30	-0.315715024156097	0.318	0.611	1.98860276732715e-26	UBP6
6.18130516317891e-30	0.252197249348398	0.78	0.463	3.11475967172585e-26	ZEO1
6.33605740091105e-30	-0.289377972242494	0.138	0.413	3.19273932431908e-26	VPS21
8.27603284508032e-30	-0.304087103442011	0.939	0.97	4.17029295063597e-26	MTC7
1.15675457177258e-29	-0.266064281061004	0.12	0.393	5.82888628716205e-26	EDE1
1.6069462786513e-29	-0.278204194236539	0.499	0.774	8.09740229812392e-26	SBH2
1.7501684344313e-29	-0.286598339002462	0.179	0.47	8.81909874109934e-26	TOM7
3.05365689495451e-29	-0.285316709199344	0.022	0.217	1.53873770936758e-25	PHO89
5.21517530292822e-29	0.262228244220884	0.362	0.076	2.62792683514553e-25	FRS2
5.91620602992692e-29	-0.284558926624603	0.432	0.715	2.98117621848017e-25	RPN3
7.12703958453447e-29	-0.307813645284289	0.215	0.507	3.59131524664692e-25	PBP4
9.07197151791921e-29	-0.257986286399074	0.121	0.387	4.57136644787949e-25	MRPL38
1.31800633820008e-28	-0.260585377324929	0.139	0.415	6.64143393819022e-25	PHB1
2.00313031001668e-28	0.274983003666947	0.47	0.17	1.00937736321741e-24	CCT2
2.61907223454512e-28	-0.275751462485744	0.188	0.474	1.31975049898729e-24	RTG2
2.91232184049839e-28	0.282035385948299	0.448	0.148	1.46751897542714e-24	SFM1
8.32597910871136e-28	-0.266766943219381	0.197	0.489	4.19546087287966e-24	RDL2
1.07073319208075e-27	-0.315317584343252	0.213	0.493	5.39542455489488e-24	TUF1
1.19109722482076e-27	-0.269153792952161	0.107	0.361	6.0019389158718e-24	GCG1
1.60458701995524e-27	0.315412404299047	0.557	0.263	8.08551399355443e-24	LYS20
2.29482758790194e-27	-0.275468907116514	0.205	0.487	1.15636362154379e-23	CIR1
7.74850817967257e-27	-0.272481414950087	0.121	0.376	3.90447327173701e-23	ODC2
1.11399016677558e-26	0.292066558375352	0.479	0.189	5.61339645038217e-23	ERG2
1.25599303961897e-26	0.291609121347741	0.564	0.267	6.32894892663999e-23	VTC3
1.32100246463245e-26	0.270596024573484	0.416	0.13	6.65653141928293e-23	PNO1
1.44939039174995e-26	0.266400421371019	0.451	0.161	7.303478184028e-23	RPS27A
1.62979998065701e-26	-0.257886160708314	0.148	0.413	8.2125621025307e-23	PTM1
1.64297258564721e-26	0.27245284820596	0.397	0.117	8.2789388590763e-23	GCD1
3.11409392967841e-26	-0.281756861002441	0.185	0.459	1.56919193116495e-22	GRX7
3.20381530181318e-26	0.277981566632568	0.615	0.335	1.61440253058366e-22	URA5
6.0761449877221e-26	0.258313177622564	0.379	0.104	3.06176945931316e-22	SAM4
6.16726570413515e-26	-0.253117676294923	0.204	0.48	3.1076851883137e-22	SKP1
8.02450395556916e-26	0.276132534526797	0.422	0.141	4.0435475432113e-22	ERP1
8.26088457236026e-26	-0.264805982382817	0.158	0.417	4.16265973601234e-22	MRPL51
8.36937633849214e-26	-0.26898900197643	0.127	0.374	4.21732873696619e-22	MIR1
8.81109938506629e-26	-0.270338673259722	0.202	0.472	4.4399129801349e-22	APS2
9.26484248179209e-26	-0.289245479897454	0.242	0.515	4.66855412657503e-22	RPN13
1.43779523389157e-25	0.253426131856012	0.339	0.078	7.24505018357964e-22	HAM1
1.95438861291611e-25	0.262653573474064	0.449	0.161	9.84816422048427e-22	HRI1
2.07144804851569e-25	0.264488060666479	0.582	0.291	1.04380267164706e-21	RPL35A
2.2697676755154e-25	0.280658778595931	0.605	0.333	1.14373593169221e-21	GET3
2.34509725259387e-25	-0.282281974450377	0.178	0.437	1.18169450558205e-21	SNF7
3.05460088749129e-25	-0.259941047879674	0.219	0.491	1.53921338720686e-21	EAF3
3.25876598284346e-25	0.282423957976652	0.71	0.465	1.64209217875482e-21	TYS1
3.31321064488232e-25	0.289113696670829	0.455	0.178	1.6695268439562e-21	YPQ1
3.43709333637897e-25	0.283751372209322	0.463	0.18	1.73195133220136e-21	TOP2
4.59193888342854e-25	0.313260845230387	0.29	0.048	2.31387800335964e-21	ARG1
6.56658707795289e-25	-0.274388793001215	0.393	0.661	3.30890322858046e-21	RPN9
7.27354409438212e-25	-0.255974603094968	0.675	0.841	3.66513886915915e-21	CMD1
1.50785491139864e-24	0.250804140528088	0.347	0.089	7.59808089853774e-21	GCN1
1.81200879339227e-24	-0.299537668963756	0.331	0.58	9.13071230990363e-21	CHO1
2.25224918347323e-24	-0.269494618832816	0.204	0.465	1.13490836355216e-20	NAS6
2.8293992017025e-24	0.254961102000354	0.402	0.133	1.42573425773789e-20	MRI1
2.94381630102415e-24	0.255465537166021	0.232	0.017	1.48338903408607e-20	CRH1
3.11973246100776e-24	0.274590296498128	0.602	0.328	1.57203318710181e-20	PRO2
4.54309093247301e-24	0.279511950313938	0.614	0.352	2.28926352087315e-20	URA4
1.0519865477776e-23	-0.286096608039406	0.405	0.652	5.30096021425134e-20	SRV2
1.13633323422841e-23	-0.276152573471018	0.196	0.446	5.72598316727694e-20	ECM3
1.14443011915863e-23	0.314296779013688	0.538	0.272	5.76678337044035e-20	ASN1
1.15835510507934e-23	0.253370837008031	0.418	0.152	5.83695137449478e-20	ADE5,7
2.07261252763651e-23	0.260732602502126	0.579	0.317	1.04438945267604e-19	YRB1
2.34082159605591e-23	-0.26550137097835	0.344	0.622	1.17954000225258e-19	IDH2
6.54198944720459e-22	-0.264189381564436	0.35	0.598	3.29650848244639e-18	APE3
1.11609063510998e-21	-0.316150218836791	0.224	0.461	5.62398071031921e-18	FUM1
2.0890196453085e-21	-0.250333814207505	0.422	0.667	1.05265699927095e-17	GVP36
2.36186879748802e-21	0.256775347877542	0.556	0.3	1.19014568705421e-17	FRE1
3.60606690775338e-21	0.256379982382648	0.829	0.678	1.81709711481693e-17	SUB2
8.73740271663531e-21	-0.279872982603665	0.15	0.372	4.40277722891253e-17	PCS60
3.68348005602282e-20	-0.406493233354525	0.035	0.193	1.8561056002299e-16	SNZ1
3.85610155264023e-20	-0.26015591384838	0.344	0.585	1.94308957237541e-16	END3
7.19778833797988e-20	-0.275372452023156	0.111	0.313	3.62696554350806e-16	ADE17
2.00847711706373e-19	0.279256437398599	0.328	0.104	1.01207161928842e-15	POL30
1.86368160955523e-17	-0.340074656456006	0.283	0.487	9.39109163054879e-14	CAR1
3.45041175454122e-15	-0.522123106090076	0.358	0.537	1.73866248311332e-11	TIP1
9.26803665101684e-15	0.25245915687857	0.267	0.085	4.67016366844738e-11	ZRT1
3.71227461862832e-14	0.254263174579831	0.139	0.011	1.87061518032681e-10	HO
1.28031992902752e-11	-0.366221015405901	0.745	0.787	6.45153212236969e-08	SSA1
8.90078651202318e-10	-0.287607989616435	0.497	0.628	4.48510632340848e-06	HSP82
4.57529270549888e-08	-0.911771297704195	0.644	0.709	0.000230548999430089	HHF2
6.88933281743484e-08	-0.257647122125857	0.591	0.752	0.000347153480670542	HHF1
