# Supplementary material for: A new protocol for single-cell RNA-seq reveals stochastic gene expression during lag phase in budding yeast
Source: eLife. 2020 May 18;9:e55320. doi: 10.7554/eLife.55320 (PMC7259953; doi:10.7554/eLife.55320)
Supplement: Supplementary file 2. [file elife-55320-supp2.xlsx]

## Sheet: growing_cluster4
GO Term	Description	P-value	FDR q-value	Enrichment	N	B	n	b	Genes
GO:0055114	oxidation-reduction process	1.58e-25	8.15e-22	2.58	4935	374	608	119	[GLG1 - glycogenin glucosyltransferase glg1, QCR6 - ubiquinol--cytochrome-c reductase subunit 6, GRX5 - grx5p, DOT5 - dot5p, CCP1 - ccp1p, GPD1 - glycerol-3-phosphate dehydrogenase (nad(+)) gpd1, COX5A - cytochrome c oxidase subunit va, PET10 - pet10p, FMP46 - fmp46p, GRX2 - grx2p, MXR2 - mxr2p, PCL7 - pcl7p, GRX1 - grx1p, PGM2 - phosphoglucomutase pgm2, CYT1 - ubiquinol--cytochrome-c reductase c…
GO:0006091	generation of precursor metabolites and energy	1.21e-19	3.11e-16	3.37	4935	147	608	61	[GLC3 - 1,4-alpha-glucan branching enzyme, GLG1 - glycogenin glucosyltransferase glg1, QCR6 - ubiquinol--cytochrome-c reductase subunit 6, COX7 - cytochrome c oxidase subunit vii, GRX5 - grx5p, COX12 - cytochrome c oxidase subunit vib, PET10 - pet10p, COX5A - cytochrome c oxidase subunit va, EMI5 - succinate dehydrogenase subunit emi5, GPM2 - phosphoglycerate mutase family protein gpm2, GRX2 - gr…
GO:0044281	small molecule metabolic process	4.61e-17	7.93e-14	1.86	4935	682	608	156	[FAD1 - fmn adenylyltransferase, COQ9 - coq9p, GPT2 - bifunctional glycerol-3-phosphate/glycerone-phosphate o-acyltransferase gpt2, GPD1 - glycerol-3-phosphate dehydrogenase (nad(+)) gpd1, AMS1 - ams1p, GPM2 - phosphoglycerate mutase family protein gpm2, LYS5 - lys5p, YSA1 - ysa1p, ATP18 - atp18p, ADE17 - bifunctional phosphoribosylaminoimidazolecarboxamide formyltransferase/imp cyclohydrolase ad…
GO:0015980	energy derivation by oxidation of organic compounds	1.27e-15	1.64e-12	3.71	4935	92	608	42	[GLC3 - 1,4-alpha-glucan branching enzyme, RGI1 - rgi1p, GPH1 - gph1p, GLG1 - glycogenin glucosyltransferase glg1, GSY2 - glycogen (starch) synthase gsy2, QCR6 - ubiquinol--cytochrome-c reductase subunit 6, DAK1 - dak1p, COX7 - cytochrome c oxidase subunit vii, AAC1 - aac1p, QCR8 - qcr8p, COX8 - cytochrome c oxidase subunit viii, PET10 - pet10p, COX5A - cytochrome c oxidase subunit va, GIP2 - gip…
GO:0015985	energy coupled proton transport, down electrochemical gradient	2.1e-12	2.17e-09	7.16	4935	17	608	15	[ATP16 - f1f0 atp synthase subunit delta, CYT1 - ubiquinol--cytochrome-c reductase catalytic subunit cyt1, ATP17 - f1f0 atp synthase subunit f, TIM11 - tim11p, ATP14 - f1f0 atp synthase subunit h, ATP5 - atp5p, ATP15 - f1f0 atp synthase subunit epsilon, ATP20 - atp20p, ATP7 - f1f0 atp synthase subunit d, ATP2 - atp2p, ATP1 - f1f0 atp synthase subunit alpha, ATP18 - atp18p, COX4 - cytochrome c oxi…
GO:0015986	ATP synthesis coupled proton transport	2.1e-12	1.81e-09	7.16	4935	17	608	15	[ATP16 - f1f0 atp synthase subunit delta, CYT1 - ubiquinol--cytochrome-c reductase catalytic subunit cyt1, ATP17 - f1f0 atp synthase subunit f, TIM11 - tim11p, ATP14 - f1f0 atp synthase subunit h, ATP5 - atp5p, ATP15 - f1f0 atp synthase subunit epsilon, ATP20 - atp20p, ATP7 - f1f0 atp synthase subunit d, ATP2 - atp2p, ATP1 - f1f0 atp synthase subunit alpha, ATP18 - atp18p, COX4 - cytochrome c oxi…
GO:0044282	small molecule catabolic process	1.18e-11	8.71e-09	2.81	4935	133	608	46	[GCV1 - glycine decarboxylase subunit t, DAK1 - dak1p, GLO1 - lactoylglutathione lyase glo1, POX1 - acyl-coa oxidase, KGD2 - alpha-ketoglutarate dehydrogenase kgd2, AMS1 - ams1p, GAD1 - glutamate decarboxylase gad1, TES1 - tes1p, GCV3 - glycine decarboxylase subunit h, GLO2 - hydroxyacylglutathione hydrolase glo2, ECI1 - dodecenoyl-coa isomerase, LAP3 - lap3p, LPD1 - dihydrolipoyl dehydrogenase, …
GO:0022900	electron transport chain	1.69e-11	1.09e-08	4.14	4935	51	608	26	[QCR6 - ubiquinol--cytochrome-c reductase subunit 6, COX7 - cytochrome c oxidase subunit vii, GRX5 - grx5p, QCR8 - qcr8p, COX12 - cytochrome c oxidase subunit vib, COX8 - cytochrome c oxidase subunit viii, COX5A - cytochrome c oxidase subunit va, EMI5 - succinate dehydrogenase subunit emi5, SDH3 - succinate dehydrogenase cytochrome b subunit sdh3, LPD1 - dihydrolipoyl dehydrogenase, GRX2 - grx2p,…
GO:0017144	drug metabolic process	2.22e-11	1.28e-08	2.26	4935	241	608	67	[RIB5 - riboflavin synthase, COX12 - cytochrome c oxidase subunit vib, CCP1 - ccp1p, KGD1 - alpha-ketoglutarate dehydrogenase kgd1, EMI5 - succinate dehydrogenase subunit emi5, GPM2 - phosphoglycerate mutase family protein gpm2, ATP18 - atp18p, GLK1 - glucokinase, BAT2 - bat2p, MDH1 - malate dehydrogenase mdh1, BMH2 - bmh2p, EMI2 - putative glucokinase, FUM1 - fumarase fum1, ATP16 - f1f0 atp synt…
GO:0019752	carboxylic acid metabolic process	3.82e-11	1.97e-08	1.94	4935	385	608	92	[MCT1 - [acyl-carrier-protein] s-malonyltransferase, GCN4 - gcn4p, GLO1 - lactoylglutathione lyase glo1, KGD1 - alpha-ketoglutarate dehydrogenase kgd1, EMI5 - succinate dehydrogenase subunit emi5, GAD1 - glutamate decarboxylase gad1, GPM2 - phosphoglycerate mutase family protein gpm2, LYS5 - lys5p, TES1 - tes1p, LEU1 - 3-isopropylmalate dehydratase leu1, GLK1 - glucokinase, FAA2 - medium-chain fa…
GO:0046395	carboxylic acid catabolic process	4.58e-11	2.15e-08	3.29	4935	84	608	34	[GCV1 - glycine decarboxylase subunit t, POX1 - acyl-coa oxidase, KGD2 - alpha-ketoglutarate dehydrogenase kgd2, GAD1 - glutamate decarboxylase gad1, TES1 - tes1p, GCV3 - glycine decarboxylase subunit h, LAP3 - lap3p, ECI1 - dodecenoyl-coa isomerase, CAR1 - arginase, LPD1 - dihydrolipoyl dehydrogenase, GCV2 - glycine decarboxylase subunit p, BAT2 - bat2p, ADH2 - alcohol dehydrogenase adh2, ALT1 -…
GO:0016054	organic acid catabolic process	6.77e-11	2.91e-08	3.25	4935	85	608	34	[GCV1 - glycine decarboxylase subunit t, POX1 - acyl-coa oxidase, KGD2 - alpha-ketoglutarate dehydrogenase kgd2, GAD1 - glutamate decarboxylase gad1, TES1 - tes1p, GCV3 - glycine decarboxylase subunit h, LAP3 - lap3p, ECI1 - dodecenoyl-coa isomerase, LPD1 - dihydrolipoyl dehydrogenase, CAR1 - arginase, GCV2 - glycine decarboxylase subunit p, BAT2 - bat2p, ALT1 - alanine transaminase alt1, ADH2 - …
GO:0043436	oxoacid metabolic process	7.16e-11	2.84e-08	1.9	4935	401	608	94	[MCT1 - [acyl-carrier-protein] s-malonyltransferase, GCN4 - gcn4p, GLO1 - lactoylglutathione lyase glo1, KGD1 - alpha-ketoglutarate dehydrogenase kgd1, EMI5 - succinate dehydrogenase subunit emi5, GAD1 - glutamate decarboxylase gad1, GPM2 - phosphoglycerate mutase family protein gpm2, LYS5 - lys5p, TES1 - tes1p, LEU1 - 3-isopropylmalate dehydratase leu1, GLK1 - glucokinase, FAA2 - medium-chain fa…
GO:0006082	organic acid metabolic process	9.63e-11	3.55e-08	1.89	4935	403	608	94	[MCT1 - [acyl-carrier-protein] s-malonyltransferase, GCN4 - gcn4p, GLO1 - lactoylglutathione lyase glo1, KGD1 - alpha-ketoglutarate dehydrogenase kgd1, EMI5 - succinate dehydrogenase subunit emi5, GAD1 - glutamate decarboxylase gad1, GPM2 - phosphoglycerate mutase family protein gpm2, LYS5 - lys5p, TES1 - tes1p, LEU1 - 3-isopropylmalate dehydratase leu1, GLK1 - glucokinase, FAA2 - medium-chain fa…
GO:0009150	purine ribonucleotide metabolic process	1.05e-10	3.61e-08	2.93	4935	108	608	39	[PDA1 - pyruvate dehydrogenase (acetyl-transferring) subunit e1 alpha, YNK1 - nucleoside diphosphate kinase, COX12 - cytochrome c oxidase subunit vib, ATP5 - atp5p, ATP20 - atp20p, LSC1 - succinate--coa ligase (gdp-forming) subunit alpha, KGD2 - alpha-ketoglutarate dehydrogenase kgd2, GPM2 - phosphoglycerate mutase family protein gpm2, TES1 - tes1p, ATP7 - f1f0 atp synthase subunit d, ATP18 - atp…
GO:0019693	ribose phosphate metabolic process	1.53e-10	4.95e-08	2.63	4935	142	608	46	[PDA1 - pyruvate dehydrogenase (acetyl-transferring) subunit e1 alpha, YNK1 - nucleoside diphosphate kinase, NQM1 - sedoheptulose-7-phosphate:d-glyceraldehyde-3-phosphate transaldolase nqm1, COX12 - cytochrome c oxidase subunit vib, SOL1 - sol1p, ATP5 - atp5p, SOL2 - sol2p, ATP20 - atp20p, LSC1 - succinate--coa ligase (gdp-forming) subunit alpha, KGD2 - alpha-ketoglutarate dehydrogenase kgd2, GPM…
GO:0006753	nucleoside phosphate metabolic process	1.87e-10	5.66e-08	2.28	4935	214	608	60	[FAD1 - fmn adenylyltransferase, YNK1 - nucleoside diphosphate kinase, COX12 - cytochrome c oxidase subunit vib, GPT2 - bifunctional glycerol-3-phosphate/glycerone-phosphate o-acyltransferase gpt2, SOL2 - sol2p, GPD1 - glycerol-3-phosphate dehydrogenase (nad(+)) gpd1, GPM2 - phosphoglycerate mutase family protein gpm2, YSA1 - ysa1p, TES1 - tes1p, ADE17 - bifunctional phosphoribosylaminoimidazolec…
GO:0009117	nucleotide metabolic process	1.98e-10	5.69e-08	2.29	4935	209	608	59	[FAD1 - fmn adenylyltransferase, YNK1 - nucleoside diphosphate kinase, COX12 - cytochrome c oxidase subunit vib, GPT2 - bifunctional glycerol-3-phosphate/glycerone-phosphate o-acyltransferase gpt2, SOL2 - sol2p, GPD1 - glycerol-3-phosphate dehydrogenase (nad(+)) gpd1, GPM2 - phosphoglycerate mutase family protein gpm2, TES1 - tes1p, ADE17 - bifunctional phosphoribosylaminoimidazolecarboxamide for…
GO:0005975	carbohydrate metabolic process	2.26e-10	6.13e-08	2.21	4935	231	608	63	[TPS1 - alpha,alpha-trehalose-phosphate synthase (udp-forming) tps1, GLC3 - 1,4-alpha-glucan branching enzyme, GLG1 - glycogenin glucosyltransferase glg1, TSL1 - tsl1p, MAL31 - mal31p, MAL33 - mal33p, KEG1 - keg1p, SOL2 - sol2p, TPS3 - tps3p, GPD1 - glycerol-3-phosphate dehydrogenase (nad(+)) gpd1, AMS1 - ams1p, GPM2 - phosphoglycerate mutase family protein gpm2, GLK1 - glucokinase, EMI2 - putati…
GO:0006099	tricarboxylic acid cycle	3.14e-10	8.11e-08	5.04	4935	29	608	18	[FUM1 - fumarase fum1, ACO1 - aconitate hydratase aco1, MDH2 - malate dehydrogenase mdh2, MDH3 - malate dehydrogenase mdh3, CIT2 - citrate (si)-synthase cit2, IDP3 - isocitrate dehydrogenase (nadp(+)) idp3, CIT1 - citrate (si)-synthase cit1, LSC2 - succinate--coa ligase (gdp-forming) subunit beta, SHH4 - protein shh4, KGD1 - alpha-ketoglutarate dehydrogenase kgd1, KGD2 - alpha-ketoglutarate dehyd…
GO:0006101	citrate metabolic process	3.14e-10	7.73e-08	5.04	4935	29	608	18	[FUM1 - fumarase fum1, ACO1 - aconitate hydratase aco1, MDH2 - malate dehydrogenase mdh2, MDH3 - malate dehydrogenase mdh3, CIT2 - citrate (si)-synthase cit2, IDP3 - isocitrate dehydrogenase (nadp(+)) idp3, CIT1 - citrate (si)-synthase cit1, LSC2 - succinate--coa ligase (gdp-forming) subunit beta, SHH4 - protein shh4, KGD1 - alpha-ketoglutarate dehydrogenase kgd1, LSC1 - succinate--coa ligase (gd…
GO:0006754	ATP biosynthetic process	3.21e-10	7.53e-08	4.25	4935	42	608	22	[PDA1 - pyruvate dehydrogenase (acetyl-transferring) subunit e1 alpha, ATP16 - f1f0 atp synthase subunit delta, CYT1 - ubiquinol--cytochrome-c reductase catalytic subunit cyt1, PDB1 - pyruvate dehydrogenase (acetyl-transferring) subunit e1 beta, ATP17 - f1f0 atp synthase subunit f, TIM11 - tim11p, ATP14 - f1f0 atp synthase subunit h, ATP15 - f1f0 atp synthase subunit epsilon, ATP5 - atp5p, ATP20 …
GO:0032787	monocarboxylic acid metabolic process	3.5e-10	7.85e-08	2.51	4935	155	608	48	[PDA1 - pyruvate dehydrogenase (acetyl-transferring) subunit e1 alpha, MCT1 - [acyl-carrier-protein] s-malonyltransferase, CIT2 - citrate (si)-synthase cit2, GLO1 - lactoylglutathione lyase glo1, POX1 - acyl-coa oxidase, ELO1 - elo1p, GPM2 - phosphoglycerate mutase family protein gpm2, TES1 - tes1p, GLO2 - hydroxyacylglutathione hydrolase glo2, CYB2 - cyb2p, ECI1 - dodecenoyl-coa isomerase, LPD1 …
GO:0016999	antibiotic metabolic process	4.02e-10	8.65e-08	3.7	4935	57	608	26	[MDH2 - malate dehydrogenase mdh2, CIT2 - citrate (si)-synthase cit2, CCP1 - ccp1p, KGD1 - alpha-ketoglutarate dehydrogenase kgd1, EMI5 - succinate dehydrogenase subunit emi5, LSC1 - succinate--coa ligase (gdp-forming) subunit alpha, KGD2 - alpha-ketoglutarate dehydrogenase kgd2, TSA2 - tsa2p, SDH3 - succinate dehydrogenase cytochrome b subunit sdh3, LPD1 - dihydrolipoyl dehydrogenase, IDH2 - iso…
GO:0009206	purine ribonucleoside triphosphate biosynthetic process	4.26e-10	8.79e-08	4.06	4935	46	608	23	[PDA1 - pyruvate dehydrogenase (acetyl-transferring) subunit e1 alpha, ATP16 - f1f0 atp synthase subunit delta, PDB1 - pyruvate dehydrogenase (acetyl-transferring) subunit e1 beta, ATP17 - f1f0 atp synthase subunit f, CYT1 - ubiquinol--cytochrome-c reductase catalytic subunit cyt1, YNK1 - nucleoside diphosphate kinase, TIM11 - tim11p, ATP14 - f1f0 atp synthase subunit h, ATP15 - f1f0 atp synthase…
GO:0009145	purine nucleoside triphosphate biosynthetic process	4.26e-10	8.46e-08	4.06	4935	46	608	23	[PDA1 - pyruvate dehydrogenase (acetyl-transferring) subunit e1 alpha, ATP16 - f1f0 atp synthase subunit delta, CYT1 - ubiquinol--cytochrome-c reductase catalytic subunit cyt1, ATP17 - f1f0 atp synthase subunit f, PDB1 - pyruvate dehydrogenase (acetyl-transferring) subunit e1 beta, YNK1 - nucleoside diphosphate kinase, TIM11 - tim11p, ATP14 - f1f0 atp synthase subunit h, ATP15 - f1f0 atp synthase…
GO:0044262	cellular carbohydrate metabolic process	4.27e-10	8.16e-08	2.59	4935	141	608	45	[TPS1 - alpha,alpha-trehalose-phosphate synthase (udp-forming) tps1, OPI10 - opi10p, BMH1 - bmh1p, GLC3 - 1,4-alpha-glucan branching enzyme, GPH1 - gph1p, GLG1 - glycogenin glucosyltransferase glg1, GSY2 - glycogen (starch) synthase gsy2, YIG1 - yig1p, CIT2 - citrate (si)-synthase cit2, DAK1 - dak1p, TSL1 - tsl1p, MAL31 - mal31p, MAL33 - mal33p, KEG1 - keg1p, TPS3 - tps3p, GIP2 - gip2p, GLC8 - gl…
GO:0045333	cellular respiration	5.95e-10	1.1e-07	3.76	4935	54	608	25	[QCR6 - ubiquinol--cytochrome-c reductase subunit 6, COX7 - cytochrome c oxidase subunit vii, AAC1 - aac1p, QCR8 - qcr8p, COX8 - cytochrome c oxidase subunit viii, PET10 - pet10p, COX5A - cytochrome c oxidase subunit va, SDH3 - succinate dehydrogenase cytochrome b subunit sdh3, MDH1 - malate dehydrogenase mdh1, MRPL51 - mitochondrial 54s ribosomal protein mrpl51, COX5B - cytochrome c oxidase subu…
GO:1901575	organic substance catabolic process	6.73e-10	1.2e-07	1.66	4935	612	608	125	[GID8 - glucose-induced degradation complex subunit gid8, CUE5 - cue5p, GPD1 - glycerol-3-phosphate dehydrogenase (nad(+)) gpd1, PBN1 - pbn1p, AMS1 - ams1p, GPM2 - phosphoglycerate mutase family protein gpm2, SNA2 - sna2p, LAP2 - lap2p, GLK1 - glucokinase, BAT2 - bat2p, EMI2 - putative glucokinase, VID24 - glucose-induced degradation complex subunit vid24, MMF1 - mmf1p, BRO1 - bro1p, PGM2 - phosp…
GO:0072350	tricarboxylic acid metabolic process	6.97e-10	1.2e-07	4.87	4935	30	608	18	[FUM1 - fumarase fum1, ACO1 - aconitate hydratase aco1, MDH2 - malate dehydrogenase mdh2, MDH3 - malate dehydrogenase mdh3, CIT2 - citrate (si)-synthase cit2, IDP3 - isocitrate dehydrogenase (nadp(+)) idp3, CIT1 - citrate (si)-synthase cit1, LSC2 - succinate--coa ligase (gdp-forming) subunit beta, SHH4 - protein shh4, KGD1 - alpha-ketoglutarate dehydrogenase kgd1, EMI5 - succinate dehydrogenase s…
GO:0009056	catabolic process	9.15e-10	1.52e-07	1.58	4935	747	608	145	[GID8 - glucose-induced degradation complex subunit gid8, CUE5 - cue5p, CCP1 - ccp1p, PEP12 - pep12p, PBN1 - pbn1p, GPD1 - glycerol-3-phosphate dehydrogenase (nad(+)) gpd1, AMS1 - ams1p, CMD1 - cmd1p, GPM2 - phosphoglycerate mutase family protein gpm2, SNA2 - sna2p, LAP2 - lap2p, GLK1 - glucokinase, BAT2 - bat2p, EMI2 - putative glucokinase, VID24 - glucose-induced degradation complex subunit vid…
GO:0046034	ATP metabolic process	1.43e-09	2.31e-07	3.75	4935	52	608	24	[PDA1 - pyruvate dehydrogenase (acetyl-transferring) subunit e1 alpha, ATP16 - f1f0 atp synthase subunit delta, CYT1 - ubiquinol--cytochrome-c reductase catalytic subunit cyt1, PDB1 - pyruvate dehydrogenase (acetyl-transferring) subunit e1 beta, ATP17 - f1f0 atp synthase subunit f, TIM11 - tim11p, COX12 - cytochrome c oxidase subunit vib, ATP14 - f1f0 atp synthase subunit h, ATP5 - atp5p, ATP15 -…
GO:0006163	purine nucleotide metabolic process	1.59e-09	2.5e-07	2.71	4935	117	608	39	[PDA1 - pyruvate dehydrogenase (acetyl-transferring) subunit e1 alpha, YNK1 - nucleoside diphosphate kinase, COX12 - cytochrome c oxidase subunit vib, ATP5 - atp5p, ATP20 - atp20p, LSC1 - succinate--coa ligase (gdp-forming) subunit alpha, KGD2 - alpha-ketoglutarate dehydrogenase kgd2, GPM2 - phosphoglycerate mutase family protein gpm2, TES1 - tes1p, ATP7 - f1f0 atp synthase subunit d, ATP18 - atp…
GO:0009259	ribonucleotide metabolic process	1.7e-09	2.59e-07	2.66	4935	122	608	40	[PDA1 - pyruvate dehydrogenase (acetyl-transferring) subunit e1 alpha, YNK1 - nucleoside diphosphate kinase, COX12 - cytochrome c oxidase subunit vib, ATP5 - atp5p, ATP20 - atp20p, LSC1 - succinate--coa ligase (gdp-forming) subunit alpha, KGD2 - alpha-ketoglutarate dehydrogenase kgd2, GPM2 - phosphoglycerate mutase family protein gpm2, TES1 - tes1p, ATP7 - f1f0 atp synthase subunit d, ADE17 - bif…
GO:0009205	purine ribonucleoside triphosphate metabolic process	2.44e-09	3.6e-07	3.56	4935	57	608	25	[PDA1 - pyruvate dehydrogenase (acetyl-transferring) subunit e1 alpha, YNK1 - nucleoside diphosphate kinase, COX12 - cytochrome c oxidase subunit vib, ATP5 - atp5p, ATP20 - atp20p, GPM2 - phosphoglycerate mutase family protein gpm2, ATP7 - f1f0 atp synthase subunit d, ATP18 - atp18p, GLK1 - glucokinase, TDH1 - tdh1p, EMI2 - putative glucokinase, ATP3 - atp3p, ATP16 - f1f0 atp synthase subunit del…
GO:0055086	nucleobase-containing small molecule metabolic process	3.42e-09	4.9e-07	2.1	4935	240	608	62	[FAD1 - fmn adenylyltransferase, YNK1 - nucleoside diphosphate kinase, COX12 - cytochrome c oxidase subunit vib, GPT2 - bifunctional glycerol-3-phosphate/glycerone-phosphate o-acyltransferase gpt2, SOL2 - sol2p, GPD1 - glycerol-3-phosphate dehydrogenase (nad(+)) gpd1, GPM2 - phosphoglycerate mutase family protein gpm2, TES1 - tes1p, YSA1 - ysa1p, ADE17 - bifunctional phosphoribosylaminoimidazolec…
GO:0006979	response to oxidative stress	3.9e-09	5.45e-07	2.76	4935	106	608	36	[TPS1 - alpha,alpha-trehalose-phosphate synthase (udp-forming) tps1, NCE103 - carbonate dehydratase nce103, HSP42 - hsp42p, MHR1 - mhr1p, GRX5 - grx5p, NQM1 - sedoheptulose-7-phosphate:d-glyceraldehyde-3-phosphate transaldolase nqm1, DOT5 - dot5p, CCP1 - ccp1p, AFG1 - afg1p, GAD1 - glutamate decarboxylase gad1, CMK2 - cmk2p, HSP12 - hsp12p, TSA2 - tsa2p, ZWF1 - glucose-6-phosphate dehydrogenase, …
GO:0051186	cofactor metabolic process	4.08e-09	5.54e-07	2.09	4935	241	608	62	[FAD1 - fmn adenylyltransferase, COQ9 - coq9p, CCP1 - ccp1p, GLO1 - lactoylglutathione lyase glo1, SOL2 - sol2p, KGD1 - alpha-ketoglutarate dehydrogenase kgd1, GPD1 - glycerol-3-phosphate dehydrogenase (nad(+)) gpd1, GPM2 - phosphoglycerate mutase family protein gpm2, TES1 - tes1p, GLK1 - glucokinase, GRX2 - grx2p, EMI2 - putative glucokinase, VHS3 - phosphopantothenoylcysteine decarboxylase comp…
GO:0009060	aerobic respiration	5.06e-09	6.7e-07	3.8	4935	47	608	22	[PAH1 - phosphatidate phosphatase pah1, COX5B - cytochrome c oxidase subunit vb, MBR1 - mbr1p, QCR7 - ubiquinol--cytochrome-c reductase subunit 7, CYC7 - cyc7p, QCR2 - ubiquinol--cytochrome-c reductase subunit 2, QCR6 - ubiquinol--cytochrome-c reductase subunit 6, ETR1 - etr1p, COX7 - cytochrome c oxidase subunit vii, AAC1 - aac1p, QCR8 - qcr8p, COR1 - ubiquinol--cytochrome-c reductase subunit co…
GO:0009144	purine nucleoside triphosphate metabolic process	5.84e-09	7.54e-07	3.44	4935	59	608	25	[PDA1 - pyruvate dehydrogenase (acetyl-transferring) subunit e1 alpha, YNK1 - nucleoside diphosphate kinase, COX12 - cytochrome c oxidase subunit vib, ATP5 - atp5p, ATP20 - atp20p, GPM2 - phosphoglycerate mutase family protein gpm2, ATP7 - f1f0 atp synthase subunit d, ATP18 - atp18p, GLK1 - glucokinase, TDH1 - tdh1p, EMI2 - putative glucokinase, ATP3 - atp3p, ATP16 - f1f0 atp synthase subunit del…
GO:0022904	respiratory electron transport chain	7.14e-09	8.99e-07	4.6	4935	30	608	17	[COX5B - cytochrome c oxidase subunit vb, QCR7 - ubiquinol--cytochrome-c reductase subunit 7, CYC7 - cyc7p, CYT1 - ubiquinol--cytochrome-c reductase catalytic subunit cyt1, QCR6 - ubiquinol--cytochrome-c reductase subunit 6, QCR2 - ubiquinol--cytochrome-c reductase subunit 2, COX7 - cytochrome c oxidase subunit vii, QCR8 - qcr8p, COX8 - cytochrome c oxidase subunit viii, SHH4 - protein shh4, COX5…
GO:0005991	trehalose metabolic process	7.39e-09	9.08e-07	7.38	4935	11	608	10	[TPS1 - alpha,alpha-trehalose-phosphate synthase (udp-forming) tps1, PGM2 - phosphoglucomutase pgm2, TSL1 - tsl1p, HSP104 - chaperone atpase hsp104, ATH1 - alpha,alpha-trehalase ath1, TPS2 - trehalose-phosphatase tps2, UGP1 - utp glucose-1-phosphate uridylyltransferase, NTH1 - alpha,alpha-trehalase nth1, NTH2 - alpha,alpha-trehalase nth2, TPS3 - tps3p]
GO:0009201	ribonucleoside triphosphate biosynthetic process	8.83e-09	1.06e-06	3.59	4935	52	608	23	[PDA1 - pyruvate dehydrogenase (acetyl-transferring) subunit e1 alpha, ATP16 - f1f0 atp synthase subunit delta, CYT1 - ubiquinol--cytochrome-c reductase catalytic subunit cyt1, ATP17 - f1f0 atp synthase subunit f, PDB1 - pyruvate dehydrogenase (acetyl-transferring) subunit e1 beta, YNK1 - nucleoside diphosphate kinase, TIM11 - tim11p, ATP14 - f1f0 atp synthase subunit h, ATP5 - atp5p, ATP15 - f1f…
GO:0009142	nucleoside triphosphate biosynthetic process	9.01e-09	1.06e-06	3.48	4935	56	608	24	[PDA1 - pyruvate dehydrogenase (acetyl-transferring) subunit e1 alpha, ATP16 - f1f0 atp synthase subunit delta, PDB1 - pyruvate dehydrogenase (acetyl-transferring) subunit e1 beta, ATP17 - f1f0 atp synthase subunit f, CYT1 - ubiquinol--cytochrome-c reductase catalytic subunit cyt1, YNK1 - nucleoside diphosphate kinase, TIM11 - tim11p, ATP14 - f1f0 atp synthase subunit h, ATP5 - atp5p, ATP15 - f1f…
GO:0009152	purine ribonucleotide biosynthetic process	1.12e-08	1.29e-06	2.97	4935	82	608	30	[PDA1 - pyruvate dehydrogenase (acetyl-transferring) subunit e1 alpha, YNK1 - nucleoside diphosphate kinase, ATP5 - atp5p, ATP20 - atp20p, GPM2 - phosphoglycerate mutase family protein gpm2, ATP7 - f1f0 atp synthase subunit d, ADE17 - bifunctional phosphoribosylaminoimidazolecarboxamide formyltransferase/imp cyclohydrolase ade17, ATP18 - atp18p, GLK1 - glucokinase, TDH1 - tdh1p, VHS3 - phosphopan…
GO:0044248	cellular catabolic process	1.34e-08	1.5e-06	1.56	4935	687	608	132	[GID8 - glucose-induced degradation complex subunit gid8, CUE5 - cue5p, CCP1 - ccp1p, PEP12 - pep12p, PBN1 - pbn1p, CMD1 - cmd1p, GPM2 - phosphoglycerate mutase family protein gpm2, SNA2 - sna2p, GLK1 - glucokinase, BAT2 - bat2p, EMI2 - putative glucokinase, VID24 - glucose-induced degradation complex subunit vid24, BRO1 - bro1p, YDC1 - alkaline dihydroceramidase, IDP3 - isocitrate dehydrogenase …
GO:0006631	fatty acid metabolic process	2.13e-08	2.34e-06	3.46	4935	54	608	23	[PAH1 - phosphatidate phosphatase pah1, ACP1 - acp1p, MCT1 - [acyl-carrier-protein] s-malonyltransferase, FAA1 - long-chain fatty acid-coa ligase faa1, MDH3 - malate dehydrogenase mdh3, IDP3 - isocitrate dehydrogenase (nadp(+)) idp3, ETR1 - etr1p, PEX11 - pex11p, YAT2 - carnitine o-acetyltransferase yat2, DCI1 - putative dodecenoyl-coa isomerase dci1, EEB1 - eeb1p, POX1 - acyl-coa oxidase, ELO1 -…
GO:0009199	ribonucleoside triphosphate metabolic process	2.9e-08	3.12e-06	3.22	4935	63	608	25	[PDA1 - pyruvate dehydrogenase (acetyl-transferring) subunit e1 alpha, YNK1 - nucleoside diphosphate kinase, COX12 - cytochrome c oxidase subunit vib, ATP5 - atp5p, ATP20 - atp20p, GPM2 - phosphoglycerate mutase family protein gpm2, ATP7 - f1f0 atp synthase subunit d, ATP18 - atp18p, GLK1 - glucokinase, TDH1 - tdh1p, EMI2 - putative glucokinase, ATP3 - atp3p, ATP16 - f1f0 atp synthase subunit del…
GO:0044242	cellular lipid catabolic process	4.28e-08	4.51e-06	3.86	4935	40	608	19	[PAH1 - phosphatidate phosphatase pah1, YJU3 - yju3p, PGC1 - pgc1p, YDC1 - alkaline dihydroceramidase, MDH3 - malate dehydrogenase mdh3, IDP3 - isocitrate dehydrogenase (nadp(+)) idp3, DCI1 - putative dodecenoyl-coa isomerase dci1, EEB1 - eeb1p, POX1 - acyl-coa oxidase, LPX1 - lpx1p, FOX2 - bifunctional hydroxyacyl-coa dehydrogenase/enoyl-coa hydratase fox2, AYR1 - acylglycerone-phosphate reducta…
GO:0009126	purine nucleoside monophosphate metabolic process	5.63e-08	5.82e-06	2.91	4935	78	608	28	[PDA1 - pyruvate dehydrogenase (acetyl-transferring) subunit e1 alpha, COX12 - cytochrome c oxidase subunit vib, ATP5 - atp5p, ATP20 - atp20p, GPM2 - phosphoglycerate mutase family protein gpm2, ATP7 - f1f0 atp synthase subunit d, ADE17 - bifunctional phosphoribosylaminoimidazolecarboxamide formyltransferase/imp cyclohydrolase ade17, ATP18 - atp18p, GLK1 - glucokinase, TDH1 - tdh1p, EMI2 - putati…
GO:0009167	purine ribonucleoside monophosphate metabolic process	5.63e-08	5.7e-06	2.91	4935	78	608	28	[PDA1 - pyruvate dehydrogenase (acetyl-transferring) subunit e1 alpha, COX12 - cytochrome c oxidase subunit vib, ATP5 - atp5p, ATP20 - atp20p, GPM2 - phosphoglycerate mutase family protein gpm2, ATP7 - f1f0 atp synthase subunit d, ATP18 - atp18p, ADE17 - bifunctional phosphoribosylaminoimidazolecarboxamide formyltransferase/imp cyclohydrolase ade17, GLK1 - glucokinase, TDH1 - tdh1p, EMI2 - putati…
GO:0072521	purine-containing compound metabolic process	7.14e-08	7.08e-06	2.4	4935	132	608	39	[PDA1 - pyruvate dehydrogenase (acetyl-transferring) subunit e1 alpha, YNK1 - nucleoside diphosphate kinase, COX12 - cytochrome c oxidase subunit vib, ATP5 - atp5p, ATP20 - atp20p, LSC1 - succinate--coa ligase (gdp-forming) subunit alpha, KGD2 - alpha-ketoglutarate dehydrogenase kgd2, GPM2 - phosphoglycerate mutase family protein gpm2, TES1 - tes1p, ATP7 - f1f0 atp synthase subunit d, ADE17 - bif…
GO:0019637	organophosphate metabolic process	7.56e-08	7.37e-06	1.76	4935	373	608	81	[UPS1 - ups1p, FAD1 - fmn adenylyltransferase, SUR1 - mannosylinositol phosphorylceramide synthase catalytic subunit sur1, YNK1 - nucleoside diphosphate kinase, COX12 - cytochrome c oxidase subunit vib, GPT2 - bifunctional glycerol-3-phosphate/glycerone-phosphate o-acyltransferase gpt2, SOL2 - sol2p, GPD1 - glycerol-3-phosphate dehydrogenase (nad(+)) gpd1, PBN1 - pbn1p, AYR1 - acylglycerone-phosp…
GO:0034599	cellular response to oxidative stress	7.93e-08	7.58e-06	2.71	4935	93	608	31	[TPS1 - alpha,alpha-trehalose-phosphate synthase (udp-forming) tps1, NCE103 - carbonate dehydratase nce103, MHR1 - mhr1p, GRX5 - grx5p, DOT5 - dot5p, NQM1 - sedoheptulose-7-phosphate:d-glyceraldehyde-3-phosphate transaldolase nqm1, CCP1 - ccp1p, GAD1 - glutamate decarboxylase gad1, AFG1 - afg1p, CMK2 - cmk2p, HSP12 - hsp12p, TSA2 - tsa2p, ZTA1 - zta1p, GRX2 - grx2p, IRA2 - ira2p, MCR1 - mcr1p, PR…
GO:0009311	oligosaccharide metabolic process	8.12e-08	7.62e-06	4.51	4935	27	608	15	[TPS1 - alpha,alpha-trehalose-phosphate synthase (udp-forming) tps1, PGM2 - phosphoglucomutase pgm2, TSL1 - tsl1p, HSP104 - chaperone atpase hsp104, MAL31 - mal31p, UGP1 - utp glucose-1-phosphate uridylyltransferase, MAL33 - mal33p, TPS3 - tps3p, AMS1 - ams1p, MAL11 - mal11p, ATH1 - alpha,alpha-trehalase ath1, NTH1 - alpha,alpha-trehalase nth1, TPS2 - trehalose-phosphatase tps2, SUC2 - beta-fruct…
GO:0009062	fatty acid catabolic process	1.01e-07	9.35e-06	5.41	4935	18	608	12	[PAH1 - phosphatidate phosphatase pah1, FOX2 - bifunctional hydroxyacyl-coa dehydrogenase/enoyl-coa hydratase fox2, TES1 - tes1p, MDH3 - malate dehydrogenase mdh3, IDP3 - isocitrate dehydrogenase (nadp(+)) idp3, ECI1 - dodecenoyl-coa isomerase, SPS19 - sps19p, DCI1 - putative dodecenoyl-coa isomerase dci1, POT1 - acetyl-coa c-acyltransferase, EEB1 - eeb1p, EHT1 - eht1p, POX1 - acyl-coa oxidase]
GO:0009127	purine nucleoside monophosphate biosynthetic process	1.22e-07	1.11e-05	3.03	4935	67	608	25	[PDA1 - pyruvate dehydrogenase (acetyl-transferring) subunit e1 alpha, ATP5 - atp5p, ATP20 - atp20p, GPM2 - phosphoglycerate mutase family protein gpm2, ATP7 - f1f0 atp synthase subunit d, ATP18 - atp18p, ADE17 - bifunctional phosphoribosylaminoimidazolecarboxamide formyltransferase/imp cyclohydrolase ade17, GLK1 - glucokinase, TDH1 - tdh1p, EMI2 - putative glucokinase, ATP3 - atp3p, ATP16 - f1f0…
GO:0009168	purine ribonucleoside monophosphate biosynthetic process	1.22e-07	1.09e-05	3.03	4935	67	608	25	[PDA1 - pyruvate dehydrogenase (acetyl-transferring) subunit e1 alpha, ATP5 - atp5p, ATP20 - atp20p, GPM2 - phosphoglycerate mutase family protein gpm2, ATP7 - f1f0 atp synthase subunit d, ATP18 - atp18p, ADE17 - bifunctional phosphoribosylaminoimidazolecarboxamide formyltransferase/imp cyclohydrolase ade17, GLK1 - glucokinase, TDH1 - tdh1p, EMI2 - putative glucokinase, ATP3 - atp3p, ATP16 - f1f0…
GO:0006164	purine nucleotide biosynthetic process	1.29e-07	1.13e-05	2.71	4935	90	608	30	[PDA1 - pyruvate dehydrogenase (acetyl-transferring) subunit e1 alpha, YNK1 - nucleoside diphosphate kinase, ATP5 - atp5p, ATP20 - atp20p, GPM2 - phosphoglycerate mutase family protein gpm2, ATP7 - f1f0 atp synthase subunit d, ATP18 - atp18p, ADE17 - bifunctional phosphoribosylaminoimidazolecarboxamide formyltransferase/imp cyclohydrolase ade17, GLK1 - glucokinase, TDH1 - tdh1p, EMI2 - putative g…
GO:0009141	nucleoside triphosphate metabolic process	1.47e-07	1.27e-05	2.93	4935	72	608	26	[PDA1 - pyruvate dehydrogenase (acetyl-transferring) subunit e1 alpha, YNK1 - nucleoside diphosphate kinase, COX12 - cytochrome c oxidase subunit vib, ATP5 - atp5p, ATP20 - atp20p, LSC1 - succinate--coa ligase (gdp-forming) subunit alpha, GPM2 - phosphoglycerate mutase family protein gpm2, ATP7 - f1f0 atp synthase subunit d, ATP18 - atp18p, GLK1 - glucokinase, TDH1 - tdh1p, EMI2 - putative glucok…
GO:0009260	ribonucleotide biosynthetic process	1.8e-07	1.53e-05	2.62	4935	96	608	31	[PDA1 - pyruvate dehydrogenase (acetyl-transferring) subunit e1 alpha, YNK1 - nucleoside diphosphate kinase, ATP5 - atp5p, ATP20 - atp20p, GPM2 - phosphoglycerate mutase family protein gpm2, ATP7 - f1f0 atp synthase subunit d, ATP18 - atp18p, ADE17 - bifunctional phosphoribosylaminoimidazolecarboxamide formyltransferase/imp cyclohydrolase ade17, GLK1 - glucokinase, TDH1 - tdh1p, EMI2 - putative g…
GO:0005984	disaccharide metabolic process	1.95e-07	1.63e-05	4.55	4935	25	608	14	[TPS1 - alpha,alpha-trehalose-phosphate synthase (udp-forming) tps1, PGM2 - phosphoglucomutase pgm2, TSL1 - tsl1p, HSP104 - chaperone atpase hsp104, MAL31 - mal31p, UGP1 - utp glucose-1-phosphate uridylyltransferase, MAL33 - mal33p, TPS3 - tps3p, MAL11 - mal11p, ATH1 - alpha,alpha-trehalase ath1, NTH1 - alpha,alpha-trehalase nth1, TPS2 - trehalose-phosphatase tps2, SUC2 - beta-fructofuranosidase …
GO:1902600	proton transmembrane transport	2.56e-07	2.1e-05	2.74	4935	83	608	28	[COX7 - cytochrome c oxidase subunit vii, COX12 - cytochrome c oxidase subunit vib, MAL31 - mal31p, COX8 - cytochrome c oxidase subunit viii, ATP5 - atp5p, COX5A - cytochrome c oxidase subunit va, ATP20 - atp20p, ATP7 - f1f0 atp synthase subunit d, HXT6 - hxt6p, ATP18 - atp18p, HXT7 - hxt7p, ATP3 - atp3p, HXT2 - hxt2p, COX5B - cytochrome c oxidase subunit vb, ATP16 - f1f0 atp synthase subunit del…
GO:0006112	energy reserve metabolic process	2.85e-07	2.3e-05	4.2	4935	29	608	15	[PCL7 - pcl7p, RGI1 - rgi1p, GLC3 - 1,4-alpha-glucan branching enzyme, GPH1 - gph1p, GLG1 - glycogenin glucosyltransferase glg1, PGM2 - phosphoglucomutase pgm2, GSY2 - glycogen (starch) synthase gsy2, UGP1 - utp glucose-1-phosphate uridylyltransferase, GDB1 - bifunctional 4-alpha-glucanotransferase/amylo-alpha-1,6-glucosidase, IGD1 - igd1p, GSY1 - glycogen (starch) synthase gsy1, GIP2 - gip2p, GL…
GO:0034314	Arp2/3 complex-mediated actin nucleation	4.18e-07	3.32e-05	8.12	4935	7	608	7	[ARP3 - arp3p, ARC35 - arc35p, ARC18 - arc18p, ARP2 - actin-related protein 2, ARC19 - arc19p, ARC15 - arc15p, ARC40 - arc40p]
GO:0016042	lipid catabolic process	4.2e-07	3.28e-05	3.31	4935	49	608	20	[PAH1 - phosphatidate phosphatase pah1, YJU3 - yju3p, PGC1 - pgc1p, MDH3 - malate dehydrogenase mdh3, YDC1 - alkaline dihydroceramidase, IDP3 - isocitrate dehydrogenase (nadp(+)) idp3, DCI1 - putative dodecenoyl-coa isomerase dci1, EEB1 - eeb1p, POX1 - acyl-coa oxidase, LDH1 - ldh1p, LPX1 - lpx1p, FOX2 - bifunctional hydroxyacyl-coa dehydrogenase/enoyl-coa hydratase fox2, AYR1 - acylglycerone-pho…
GO:0072522	purine-containing compound biosynthetic process	4.93e-07	3.8e-05	2.56	4935	95	608	30	[PDA1 - pyruvate dehydrogenase (acetyl-transferring) subunit e1 alpha, YNK1 - nucleoside diphosphate kinase, ATP5 - atp5p, ATP20 - atp20p, GPM2 - phosphoglycerate mutase family protein gpm2, ATP7 - f1f0 atp synthase subunit d, ADE17 - bifunctional phosphoribosylaminoimidazolecarboxamide formyltransferase/imp cyclohydrolase ade17, ATP18 - atp18p, GLK1 - glucokinase, TDH1 - tdh1p, VHS3 - phosphopan…
GO:0015672	monovalent inorganic cation transport	8e-07	6.08e-05	2.56	4935	92	608	29	[COX7 - cytochrome c oxidase subunit vii, PHO89 - pho89p, COX12 - cytochrome c oxidase subunit vib, MAL31 - mal31p, ATP5 - atp5p, COX8 - cytochrome c oxidase subunit viii, COX5A - cytochrome c oxidase subunit va, ATP20 - atp20p, ATP7 - f1f0 atp synthase subunit d, HXT6 - hxt6p, ATP18 - atp18p, HXT7 - hxt7p, ATP3 - atp3p, HXT2 - hxt2p, COX5B - cytochrome c oxidase subunit vb, ATP16 - f1f0 atp synt…
GO:0046390	ribose phosphate biosynthetic process	8.18e-07	6.12e-05	2.47	4935	102	608	31	[PDA1 - pyruvate dehydrogenase (acetyl-transferring) subunit e1 alpha, YNK1 - nucleoside diphosphate kinase, ATP5 - atp5p, ATP20 - atp20p, GPM2 - phosphoglycerate mutase family protein gpm2, ATP7 - f1f0 atp synthase subunit d, ATP18 - atp18p, ADE17 - bifunctional phosphoribosylaminoimidazolecarboxamide formyltransferase/imp cyclohydrolase ade17, GLK1 - glucokinase, TDH1 - tdh1p, EMI2 - putative g…
GO:0098655	cation transmembrane transport	8.29e-07	6.11e-05	2.09	4935	171	608	44	[AVT7 - avt7p, COX7 - cytochrome c oxidase subunit vii, AVT6 - avt6p, MNR2 - putative mg(2+) transporter mnr2, PHO89 - pho89p, COX12 - cytochrome c oxidase subunit vib, MAL31 - mal31p, ADY2 - ady2p, ATP5 - atp5p, COX8 - cytochrome c oxidase subunit viii, COX5A - cytochrome c oxidase subunit va, ATP20 - atp20p, PIC2 - pic2p, ATP7 - f1f0 atp synthase subunit d, HXT6 - hxt6p, ATP18 - atp18p, HXT7 - …
GO:0098869	cellular oxidant detoxification	8.71e-07	6.33e-05	3.93	4935	31	608	15	[GRX1 - grx1p, GPX1 - glutathione peroxidase gpx1, SOD1 - sod1p, DOT5 - dot5p, GLR1 - glutathione-disulfide reductase glr1, CCP1 - ccp1p, CTA1 - catalase a, CTT1 - catalase t, TSA2 - tsa2p, ECM4 - ecm4p, GRX7 - glutathione-disulfide reductase grx7, GRX2 - grx2p, HYR1 - peroxiredoxin hyr1, GTT1 - bifunctional glutathione transferase/peroxidase, PRX1 - prx1p]
GO:0034440	lipid oxidation	9.65e-07	6.92e-05	6.09	4935	12	608	9	[FOX2 - bifunctional hydroxyacyl-coa dehydrogenase/enoyl-coa hydratase fox2, TES1 - tes1p, MDH3 - malate dehydrogenase mdh3, IDP3 - isocitrate dehydrogenase (nadp(+)) idp3, ECI1 - dodecenoyl-coa isomerase, PEX11 - pex11p, DCI1 - putative dodecenoyl-coa isomerase dci1, POT1 - acetyl-coa c-acyltransferase, POX1 - acyl-coa oxidase]
GO:0019395	fatty acid oxidation	9.65e-07	6.82e-05	6.09	4935	12	608	9	[FOX2 - bifunctional hydroxyacyl-coa dehydrogenase/enoyl-coa hydratase fox2, TES1 - tes1p, MDH3 - malate dehydrogenase mdh3, IDP3 - isocitrate dehydrogenase (nadp(+)) idp3, ECI1 - dodecenoyl-coa isomerase, PEX11 - pex11p, DCI1 - putative dodecenoyl-coa isomerase dci1, POT1 - acetyl-coa c-acyltransferase, POX1 - acyl-coa oxidase]
GO:0098754	detoxification	9.85e-07	6.87e-05	3.71	4935	35	608	16	[GRX1 - grx1p, GPX1 - glutathione peroxidase gpx1, SOD1 - sod1p, DOT5 - dot5p, GLR1 - glutathione-disulfide reductase glr1, CCP1 - ccp1p, CTA1 - catalase a, CTT1 - catalase t, TSA2 - tsa2p, ECM4 - ecm4p, GRX7 - glutathione-disulfide reductase grx7, GRX2 - grx2p, POT1 - acetyl-coa c-acyltransferase, HYR1 - peroxiredoxin hyr1, GTT1 - bifunctional glutathione transferase/peroxidase, PRX1 - prx1p]
GO:0009161	ribonucleoside monophosphate metabolic process	1.32e-06	9.08e-05	2.5	4935	94	608	29	[PDA1 - pyruvate dehydrogenase (acetyl-transferring) subunit e1 alpha, COX12 - cytochrome c oxidase subunit vib, ATP5 - atp5p, ATP20 - atp20p, GPM2 - phosphoglycerate mutase family protein gpm2, ATP7 - f1f0 atp synthase subunit d, ADE17 - bifunctional phosphoribosylaminoimidazolecarboxamide formyltransferase/imp cyclohydrolase ade17, ATP18 - atp18p, GLK1 - glucokinase, TDH1 - tdh1p, EMI2 - putati…
GO:0070887	cellular response to chemical stimulus	1.77e-06	0.00012	1.95	4935	204	608	49	[TPS1 - alpha,alpha-trehalose-phosphate synthase (udp-forming) tps1, NCE103 - carbonate dehydratase nce103, GCN4 - gcn4p, GRX5 - grx5p, DOT5 - dot5p, CCP1 - ccp1p, GAD1 - glutamate decarboxylase gad1, SNF7 - snf7p, GRX2 - grx2p, IRA2 - ira2p, MXR2 - mxr2p, GRX1 - grx1p, GPX1 - glutathione peroxidase gpx1, STF2 - stf2p, SOD1 - sod1p, GLR1 - glutathione-disulfide reductase glr1, HBN1 - hbn1p, CST6 …
GO:1990748	cellular detoxification	2.37e-06	0.000159	3.69	4935	33	608	15	[GRX1 - grx1p, GPX1 - glutathione peroxidase gpx1, SOD1 - sod1p, DOT5 - dot5p, GLR1 - glutathione-disulfide reductase glr1, CCP1 - ccp1p, CTA1 - catalase a, CTT1 - catalase t, TSA2 - tsa2p, GRX7 - glutathione-disulfide reductase grx7, ECM4 - ecm4p, GRX2 - grx2p, HYR1 - peroxiredoxin hyr1, GTT1 - bifunctional glutathione transferase/peroxidase, PRX1 - prx1p]
GO:0009156	ribonucleoside monophosphate biosynthetic process	3.41e-06	0.000226	2.54	4935	83	608	26	[PDA1 - pyruvate dehydrogenase (acetyl-transferring) subunit e1 alpha, ATP5 - atp5p, ATP20 - atp20p, GPM2 - phosphoglycerate mutase family protein gpm2, ATP7 - f1f0 atp synthase subunit d, ADE17 - bifunctional phosphoribosylaminoimidazolecarboxamide formyltransferase/imp cyclohydrolase ade17, ATP18 - atp18p, GLK1 - glucokinase, TDH1 - tdh1p, EMI2 - putative glucokinase, ATP3 - atp3p, ATP16 - f1f0…
GO:0030832	regulation of actin filament length	3.76e-06	0.000246	3.58	4935	34	608	15	[CAP1 - cap1p, ARP3 - arp3p, PFY1 - pfy1p, ARC18 - arc18p, TWF1 - twf1p, ARC40 - arc40p, BBC1 - bbc1p, ARC35 - arc35p, CAP2 - cap2p, AIM7 - aim7p, PIN3 - pin3p, ARP2 - actin-related protein 2, ARC19 - arc19p, SRV2 - srv2p, ARC15 - arc15p]
GO:0008064	regulation of actin polymerization or depolymerization	3.76e-06	0.000243	3.58	4935	34	608	15	[ARP3 - arp3p, CAP1 - cap1p, PFY1 - pfy1p, ARC18 - arc18p, TWF1 - twf1p, ARC40 - arc40p, BBC1 - bbc1p, CAP2 - cap2p, ARC35 - arc35p, AIM7 - aim7p, PIN3 - pin3p, ARP2 - actin-related protein 2, ARC19 - arc19p, SRV2 - srv2p, ARC15 - arc15p]
GO:0072329	monocarboxylic acid catabolic process	3.76e-06	0.00024	3.58	4935	34	608	15	[PAH1 - phosphatidate phosphatase pah1, MDH3 - malate dehydrogenase mdh3, IDP3 - isocitrate dehydrogenase (nadp(+)) idp3, DCI1 - putative dodecenoyl-coa isomerase dci1, DLD1 - dld1p, EEB1 - eeb1p, POX1 - acyl-coa oxidase, UGA1 - 4-aminobutyrate transaminase, GOR1 - gor1p, FOX2 - bifunctional hydroxyacyl-coa dehydrogenase/enoyl-coa hydratase fox2, TES1 - tes1p, ECI1 - dodecenoyl-coa isomerase, SPS…
GO:1901293	nucleoside phosphate biosynthetic process	5.02e-06	0.000316	2.08	4935	148	608	38	[PDA1 - pyruvate dehydrogenase (acetyl-transferring) subunit e1 alpha, FAD1 - fmn adenylyltransferase, YNK1 - nucleoside diphosphate kinase, GPT2 - bifunctional glycerol-3-phosphate/glycerone-phosphate o-acyltransferase gpt2, ATP5 - atp5p, ATP20 - atp20p, LSC1 - succinate--coa ligase (gdp-forming) subunit alpha, GPM2 - phosphoglycerate mutase family protein gpm2, ATP7 - f1f0 atp synthase subunit …
GO:0005977	glycogen metabolic process	5.12e-06	0.000319	3.91	4935	27	608	13	[PCL7 - pcl7p, GLC3 - 1,4-alpha-glucan branching enzyme, GPH1 - gph1p, GLG1 - glycogenin glucosyltransferase glg1, PGM2 - phosphoglucomutase pgm2, GSY2 - glycogen (starch) synthase gsy2, UGP1 - utp glucose-1-phosphate uridylyltransferase, GDB1 - bifunctional 4-alpha-glucanotransferase/amylo-alpha-1,6-glucosidase, IGD1 - igd1p, GSY1 - glycogen (starch) synthase gsy1, GIP2 - gip2p, GLC8 - glc8p, GL…
GO:0043648	dicarboxylic acid metabolic process	5.88e-06	0.000362	2.97	4935	52	608	19	[FUM1 - fumarase fum1, GDH3 - glutamate dehydrogenase (nadp(+)) gdh3, MDH3 - malate dehydrogenase mdh3, MDH2 - malate dehydrogenase mdh2, PCS60 - pcs60p, CIT2 - citrate (si)-synthase cit2, CIT1 - citrate (si)-synthase cit1, PUT1 - proline dehydrogenase, GDH2 - glutamate dehydrogenase (nad(+)), KGD1 - alpha-ketoglutarate dehydrogenase kgd1, KGD2 - alpha-ketoglutarate dehydrogenase kgd2, LSC1 - suc…
GO:0006635	fatty acid beta-oxidation	5.97e-06	0.000362	5.9	4935	11	608	8	[FOX2 - bifunctional hydroxyacyl-coa dehydrogenase/enoyl-coa hydratase fox2, TES1 - tes1p, MDH3 - malate dehydrogenase mdh3, IDP3 - isocitrate dehydrogenase (nadp(+)) idp3, ECI1 - dodecenoyl-coa isomerase, DCI1 - putative dodecenoyl-coa isomerase dci1, POT1 - acetyl-coa c-acyltransferase, POX1 - acyl-coa oxidase]
GO:0006123	mitochondrial electron transport, cytochrome c to oxygen	5.97e-06	0.000358	5.9	4935	11	608	8	[COX5B - cytochrome c oxidase subunit vb, COX5A - cytochrome c oxidase subunit va, CYC7 - cyc7p, COX7 - cytochrome c oxidase subunit vii, COX4 - cytochrome c oxidase subunit iv, COX13 - cytochrome c oxidase subunit via, COX8 - cytochrome c oxidase subunit viii, COX9 - cytochrome c oxidase subunit viia]
GO:0098662	inorganic cation transmembrane transport	6.6e-06	0.000392	2.14	4935	133	608	35	[COX7 - cytochrome c oxidase subunit vii, MNR2 - putative mg(2+) transporter mnr2, PHO89 - pho89p, COX12 - cytochrome c oxidase subunit vib, MAL31 - mal31p, COX8 - cytochrome c oxidase subunit viii, ATP5 - atp5p, COX5A - cytochrome c oxidase subunit va, ATP20 - atp20p, PIC2 - pic2p, ATP7 - f1f0 atp synthase subunit d, ATP18 - atp18p, HXT6 - hxt6p, CCC1 - ccc1p, HXT7 - hxt7p, PMC1 - calcium-transp…
GO:0005978	glycogen biosynthetic process	6.97e-06	0.000409	5.22	4935	14	608	9	[IGD1 - igd1p, GSY1 - glycogen (starch) synthase gsy1, GLC3 - 1,4-alpha-glucan branching enzyme, GLG1 - glycogenin glucosyltransferase glg1, PGM2 - phosphoglucomutase pgm2, GLC8 - glc8p, GSY2 - glycogen (starch) synthase gsy2, GDB1 - bifunctional 4-alpha-glucanotransferase/amylo-alpha-1,6-glucosidase, UGP1 - utp glucose-1-phosphate uridylyltransferase]
GO:0009124	nucleoside monophosphate biosynthetic process	7.09e-06	0.000412	2.45	4935	86	608	26	[PDA1 - pyruvate dehydrogenase (acetyl-transferring) subunit e1 alpha, ATP5 - atp5p, ATP20 - atp20p, GPM2 - phosphoglycerate mutase family protein gpm2, ATP7 - f1f0 atp synthase subunit d, ADE17 - bifunctional phosphoribosylaminoimidazolecarboxamide formyltransferase/imp cyclohydrolase ade17, ATP18 - atp18p, GLK1 - glucokinase, TDH1 - tdh1p, EMI2 - putative glucokinase, ATP3 - atp3p, ATP16 - f1f0…
GO:0044396	actin cortical patch organization	7.28e-06	0.000418	4.06	4935	24	608	12	[ARP3 - arp3p, ARC35 - arc35p, ARC18 - arc18p, ENT2 - ent2p, SYP1 - syp1p, TWF1 - twf1p, EDE1 - ede1p, ARP2 - actin-related protein 2, ARC19 - arc19p, ARC15 - arc15p, END3 - end3p, ARC40 - arc40p]
GO:0034220	ion transmembrane transport	7.6e-06	0.000431	1.82	4935	232	608	52	[ODC2 - odc2p, COX7 - cytochrome c oxidase subunit vii, AVT6 - avt6p, MNR2 - putative mg(2+) transporter mnr2, PHO89 - pho89p, COX12 - cytochrome c oxidase subunit vib, MAL31 - mal31p, COX5A - cytochrome c oxidase subunit va, POR1 - por1p, ATP18 - atp18p, HXT6 - hxt6p, CCC1 - ccc1p, HXT7 - hxt7p, PMC1 - calcium-transporting atpase pmc1, PHM7 - phm7p, HXT2 - hxt2p, ATP16 - f1f0 atp synthase subuni…
GO:0009165	nucleotide biosynthetic process	7.83e-06	0.000439	2.07	4935	145	608	37	[PDA1 - pyruvate dehydrogenase (acetyl-transferring) subunit e1 alpha, FAD1 - fmn adenylyltransferase, YNK1 - nucleoside diphosphate kinase, GPT2 - bifunctional glycerol-3-phosphate/glycerone-phosphate o-acyltransferase gpt2, ATP5 - atp5p, ATP20 - atp20p, GPM2 - phosphoglycerate mutase family protein gpm2, ATP7 - f1f0 atp synthase subunit d, ADE17 - bifunctional phosphoribosylaminoimidazolecarbox…
GO:0055085	transmembrane transport	8.12e-06	0.000451	1.6	4935	396	608	78	[PAM17 - pam17p, ODC2 - odc2p, COX7 - cytochrome c oxidase subunit vii, ITR1 - itr1p, AVT6 - avt6p, PHO89 - pho89p, MNR2 - putative mg(2+) transporter mnr2, COX12 - cytochrome c oxidase subunit vib, MAL31 - mal31p, GPD1 - glycerol-3-phosphate dehydrogenase (nad(+)) gpd1, COX5A - cytochrome c oxidase subunit va, POR1 - por1p, ATP18 - atp18p, HXT6 - hxt6p, GLK1 - glucokinase, HXT7 - hxt7p, CCC1 - c…
GO:0009123	nucleoside monophosphate metabolic process	8.17e-06	0.000449	2.31	4935	102	608	29	[PDA1 - pyruvate dehydrogenase (acetyl-transferring) subunit e1 alpha, COX12 - cytochrome c oxidase subunit vib, ATP5 - atp5p, ATP20 - atp20p, GPM2 - phosphoglycerate mutase family protein gpm2, ATP7 - f1f0 atp synthase subunit d, ADE17 - bifunctional phosphoribosylaminoimidazolecarboxamide formyltransferase/imp cyclohydrolase ade17, ATP18 - atp18p, GLK1 - glucokinase, TDH1 - tdh1p, ATP3 - atp3p,…
GO:0098660	inorganic ion transmembrane transport	1.03e-05	0.000557	2.07	4935	141	608	36	[COX7 - cytochrome c oxidase subunit vii, MNR2 - putative mg(2+) transporter mnr2, PHO89 - pho89p, MIR1 - mir1p, COX12 - cytochrome c oxidase subunit vib, MAL31 - mal31p, ATP5 - atp5p, COX8 - cytochrome c oxidase subunit viii, COX5A - cytochrome c oxidase subunit va, ATP20 - atp20p, PIC2 - pic2p, ATP7 - f1f0 atp synthase subunit d, ATP18 - atp18p, HXT6 - hxt6p, CCC1 - ccc1p, HXT7 - hxt7p, PMC1 - …
GO:0006812	cation transport	1.12e-05	0.000605	1.86	4935	205	608	47	[AVT7 - avt7p, COX7 - cytochrome c oxidase subunit vii, AVT6 - avt6p, MNR2 - putative mg(2+) transporter mnr2, PHO89 - pho89p, COX12 - cytochrome c oxidase subunit vib, MAL31 - mal31p, ADY2 - ady2p, ATP5 - atp5p, COX8 - cytochrome c oxidase subunit viii, COX5A - cytochrome c oxidase subunit va, ATP20 - atp20p, PMP3 - pmp3p, PIC2 - pic2p, ATP7 - f1f0 atp synthase subunit d, HXT6 - hxt6p, ATP18 - a…
GO:0006732	coenzyme metabolic process	1.18e-05	0.000629	1.94	4935	176	608	42	[PDA1 - pyruvate dehydrogenase (acetyl-transferring) subunit e1 alpha, FAD1 - fmn adenylyltransferase, NQM1 - sedoheptulose-7-phosphate:d-glyceraldehyde-3-phosphate transaldolase nqm1, COQ9 - coq9p, SOL1 - sol1p, SOL2 - sol2p, GPD1 - glycerol-3-phosphate dehydrogenase (nad(+)) gpd1, LSC1 - succinate--coa ligase (gdp-forming) subunit alpha, KGD2 - alpha-ketoglutarate dehydrogenase kgd2, GPM2 - pho…
GO:0010906	regulation of glucose metabolic process	1.37e-05	0.000721	3.64	4935	29	608	13	[PHO85 - pho85p, PCL7 - pcl7p, BMH1 - bmh1p, UBC8 - e2 ubiquitin-conjugating protein ubc8, VID30 - glucose-induced degradation complex subunit vid30, GID8 - glucose-induced degradation complex subunit gid8, PIG2 - pig2p, IGD1 - igd1p, FYV10 - glucose-induced degradation complex subunit fyv10, PSK1 - psk1p, GLC7 - glc7p, BMH2 - bmh2p, VID24 - glucose-induced degradation complex subunit vid24]
GO:0030833	regulation of actin filament polymerization	1.39e-05	0.000723	3.44	4935	33	608	14	[CAP1 - cap1p, ARP3 - arp3p, PFY1 - pfy1p, ARC18 - arc18p, TWF1 - twf1p, BBC1 - bbc1p, ARC40 - arc40p, ARC35 - arc35p, AIM7 - aim7p, CAP2 - cap2p, PIN3 - pin3p, ARP2 - actin-related protein 2, ARC19 - arc19p, ARC15 - arc15p]
GO:1901135	carbohydrate derivative metabolic process	1.49e-05	0.000771	1.69	4935	293	608	61	[SUR1 - mannosylinositol phosphorylceramide synthase catalytic subunit sur1, YNK1 - nucleoside diphosphate kinase, COX12 - cytochrome c oxidase subunit vib, SOL2 - sol2p, PBN1 - pbn1p, GPD1 - glycerol-3-phosphate dehydrogenase (nad(+)) gpd1, GPM2 - phosphoglycerate mutase family protein gpm2, TES1 - tes1p, YSA1 - ysa1p, ADE17 - bifunctional phosphoribosylaminoimidazolecarboxamide formyltransferas…
GO:0019646	aerobic electron transport chain	1.6e-05	0.000816	5.41	4935	12	608	8	[COX5A - cytochrome c oxidase subunit va, COX5B - cytochrome c oxidase subunit vb, CYC7 - cyc7p, COX7 - cytochrome c oxidase subunit vii, COX4 - cytochrome c oxidase subunit iv, COX13 - cytochrome c oxidase subunit via, COX9 - cytochrome c oxidase subunit viia, COX8 - cytochrome c oxidase subunit viii]
GO:0005992	trehalose biosynthetic process	2.14e-05	0.00109	6.96	4935	7	608	6	[TPS1 - alpha,alpha-trehalose-phosphate synthase (udp-forming) tps1, PGM2 - phosphoglucomutase pgm2, TSL1 - tsl1p, UGP1 - utp glucose-1-phosphate uridylyltransferase, TPS2 - trehalose-phosphatase tps2, TPS3 - tps3p]
GO:0071462	cellular response to water stimulus	2.8e-05	0.0014	8.12	4935	5	608	5	[TPS1 - alpha,alpha-trehalose-phosphate synthase (udp-forming) tps1, SIP18 - sip18p, STF2 - stf2p, ATH1 - alpha,alpha-trehalase ath1, NTH1 - alpha,alpha-trehalase nth1]
GO:0006103	2-oxoglutarate metabolic process	2.8e-05	0.00139	8.12	4935	5	608	5	[KGD1 - alpha-ketoglutarate dehydrogenase kgd1, KGD2 - alpha-ketoglutarate dehydrogenase kgd2, YMR31 - mitochondrial 37s ribosomal protein ymr31, LPD1 - dihydrolipoyl dehydrogenase, GDH2 - glutamate dehydrogenase (nad(+))]
GO:0070413	trehalose metabolism in response to stress	2.8e-05	0.00138	8.12	4935	5	608	5	[TPS1 - alpha,alpha-trehalose-phosphate synthase (udp-forming) tps1, TSL1 - tsl1p, HSP104 - chaperone atpase hsp104, TPS2 - trehalose-phosphatase tps2, TPS3 - tps3p]
GO:0042631	cellular response to water deprivation	2.8e-05	0.00136	8.12	4935	5	608	5	[TPS1 - alpha,alpha-trehalose-phosphate synthase (udp-forming) tps1, STF2 - stf2p, SIP18 - sip18p, ATH1 - alpha,alpha-trehalase ath1, NTH1 - alpha,alpha-trehalase nth1]
GO:0009414	response to water deprivation	2.8e-05	0.00135	8.12	4935	5	608	5	[TPS1 - alpha,alpha-trehalose-phosphate synthase (udp-forming) tps1, SIP18 - sip18p, STF2 - stf2p, ATH1 - alpha,alpha-trehalase ath1, NTH1 - alpha,alpha-trehalase nth1]
GO:0009415	response to water	2.8e-05	0.00134	8.12	4935	5	608	5	[TPS1 - alpha,alpha-trehalose-phosphate synthase (udp-forming) tps1, STF2 - stf2p, SIP18 - sip18p, ATH1 - alpha,alpha-trehalase ath1, NTH1 - alpha,alpha-trehalase nth1]
GO:0045010	actin nucleation	3.58e-05	0.00169	5.68	4935	10	608	7	[ARP3 - arp3p, ARC35 - arc35p, ARC18 - arc18p, ARP2 - actin-related protein 2, ARC19 - arc19p, ARC15 - arc15p, ARC40 - arc40p]
GO:0006637	acyl-CoA metabolic process	4.35e-05	0.00204	4.06	4935	20	608	10	[PDA1 - pyruvate dehydrogenase (acetyl-transferring) subunit e1 alpha, KGD2 - alpha-ketoglutarate dehydrogenase kgd2, LSC1 - succinate--coa ligase (gdp-forming) subunit alpha, FAA1 - long-chain fatty acid-coa ligase faa1, TES1 - tes1p, PDB1 - pyruvate dehydrogenase (acetyl-transferring) subunit e1 beta, LAT1 - dihydrolipoyllysine-residue acetyltransferase, CIT1 - citrate (si)-synthase cit1, ACS1 …
GO:0035383	thioester metabolic process	4.35e-05	0.00202	4.06	4935	20	608	10	[PDA1 - pyruvate dehydrogenase (acetyl-transferring) subunit e1 alpha, KGD2 - alpha-ketoglutarate dehydrogenase kgd2, LSC1 - succinate--coa ligase (gdp-forming) subunit alpha, FAA1 - long-chain fatty acid-coa ligase faa1, TES1 - tes1p, PDB1 - pyruvate dehydrogenase (acetyl-transferring) subunit e1 beta, LAT1 - dihydrolipoyllysine-residue acetyltransferase, CIT1 - citrate (si)-synthase cit1, ACS1 …
GO:0010675	regulation of cellular carbohydrate metabolic process	4.92e-05	0.00227	3.3	4935	32	608	13	[PHO85 - pho85p, PCL7 - pcl7p, UBC8 - e2 ubiquitin-conjugating protein ubc8, BMH1 - bmh1p, VID30 - glucose-induced degradation complex subunit vid30, GID8 - glucose-induced degradation complex subunit gid8, PIG2 - pig2p, IGD1 - igd1p, FYV10 - glucose-induced degradation complex subunit fyv10, PSK1 - psk1p, GLC7 - glc7p, BMH2 - bmh2p, VID24 - glucose-induced degradation complex subunit vid24]
GO:1901565	organonitrogen compound catabolic process	5.26e-05	0.0024	1.64	4935	292	608	59	[UBC8 - e2 ubiquitin-conjugating protein ubc8, APE3 - ape3p, GID8 - glucose-induced degradation complex subunit gid8, PBN1 - pbn1p, GAD1 - glutamate decarboxylase gad1, SNA2 - sna2p, LAP2 - lap2p, SAF1 - scf ubiquitin ligase complex subunit saf1, ATG19 - atg19p, BAT2 - bat2p, VID24 - glucose-induced degradation complex subunit vid24, VID30 - glucose-induced degradation complex subunit vid30, ALT2…
GO:0009063	cellular amino acid catabolic process	5.78e-05	0.00262	2.66	4935	55	608	18	[ALT2 - alanine transaminase alt2, ARO10 - phenylpyruvate decarboxylase aro10, GCV1 - glycine decarboxylase subunit t, PUT1 - proline dehydrogenase, GDH2 - glutamate dehydrogenase (nad(+)), UGA1 - 4-aminobutyrate transaminase, KGD2 - alpha-ketoglutarate dehydrogenase kgd2, DSD1 - d-serine ammonia-lyase dsd1, GAD1 - glutamate decarboxylase gad1, GCV3 - glycine decarboxylase subunit h, LAP3 - lap3p…
GO:0007015	actin filament organization	7.56e-05	0.00339	2.61	4935	56	608	18	[ARP3 - arp3p, RHO5 - rho5p, LSB5 - lsb5p, ARC18 - arc18p, TWF1 - twf1p, SLM1 - slm1p, END3 - end3p, RVS161 - rvs161p, BBC1 - bbc1p, ARC40 - arc40p, ARC35 - arc35p, SAC6 - sac6p, COF1 - cof1p, ENT2 - ent2p, ARP2 - actin-related protein 2, ARC19 - arc19p, SRV2 - srv2p, ARC15 - arc15p]
GO:0046351	disaccharide biosynthetic process	7.68e-05	0.00342	6.09	4935	8	608	6	[TPS1 - alpha,alpha-trehalose-phosphate synthase (udp-forming) tps1, PGM2 - phosphoglucomutase pgm2, TSL1 - tsl1p, TPS2 - trehalose-phosphatase tps2, UGP1 - utp glucose-1-phosphate uridylyltransferase, TPS3 - tps3p]
GO:0009312	oligosaccharide biosynthetic process	7.68e-05	0.00339	6.09	4935	8	608	6	[TPS1 - alpha,alpha-trehalose-phosphate synthase (udp-forming) tps1, PGM2 - phosphoglucomutase pgm2, TSL1 - tsl1p, UGP1 - utp glucose-1-phosphate uridylyltransferase, TPS2 - trehalose-phosphatase tps2, TPS3 - tps3p]
GO:1901606	alpha-amino acid catabolic process	7.73e-05	0.00338	2.9	4935	42	608	15	[ALT2 - alanine transaminase alt2, ARO10 - phenylpyruvate decarboxylase aro10, GCV1 - glycine decarboxylase subunit t, PUT1 - proline dehydrogenase, GDH2 - glutamate dehydrogenase (nad(+)), KGD2 - alpha-ketoglutarate dehydrogenase kgd2, DSD1 - d-serine ammonia-lyase dsd1, GAD1 - glutamate decarboxylase gad1, GCV3 - glycine decarboxylase subunit h, LAP3 - lap3p, CAR2 - ornithine-oxo-acid transamin…
GO:0034032	purine nucleoside bisphosphate metabolic process	7.77e-05	0.00337	3.36	4935	29	608	12	[PDA1 - pyruvate dehydrogenase (acetyl-transferring) subunit e1 alpha, KGD2 - alpha-ketoglutarate dehydrogenase kgd2, LSC1 - succinate--coa ligase (gdp-forming) subunit alpha, FAA1 - long-chain fatty acid-coa ligase faa1, TES1 - tes1p, PDB1 - pyruvate dehydrogenase (acetyl-transferring) subunit e1 beta, LAT1 - dihydrolipoyllysine-residue acetyltransferase, CIT1 - citrate (si)-synthase cit1, ACS1 …
GO:0033865	nucleoside bisphosphate metabolic process	7.77e-05	0.00334	3.36	4935	29	608	12	[PDA1 - pyruvate dehydrogenase (acetyl-transferring) subunit e1 alpha, KGD2 - alpha-ketoglutarate dehydrogenase kgd2, LSC1 - succinate--coa ligase (gdp-forming) subunit alpha, FAA1 - long-chain fatty acid-coa ligase faa1, TES1 - tes1p, PDB1 - pyruvate dehydrogenase (acetyl-transferring) subunit e1 beta, LAT1 - dihydrolipoyllysine-residue acetyltransferase, CIT1 - citrate (si)-synthase cit1, ACS1 …
GO:0033875	ribonucleoside bisphosphate metabolic process	7.77e-05	0.00332	3.36	4935	29	608	12	[PDA1 - pyruvate dehydrogenase (acetyl-transferring) subunit e1 alpha, KGD2 - alpha-ketoglutarate dehydrogenase kgd2, LSC1 - succinate--coa ligase (gdp-forming) subunit alpha, FAA1 - long-chain fatty acid-coa ligase faa1, TES1 - tes1p, PDB1 - pyruvate dehydrogenase (acetyl-transferring) subunit e1 beta, LAT1 - dihydrolipoyllysine-residue acetyltransferase, CIT1 - citrate (si)-synthase cit1, LSC2 …
GO:0016052	carbohydrate catabolic process	9.67e-05	0.00409	2.37	4935	72	608	21	[PDA1 - pyruvate dehydrogenase (acetyl-transferring) subunit e1 alpha, GPH1 - gph1p, XKS1 - xylulokinase, GCY1 - gcy1p, PGM2 - phosphoglucomutase pgm2, PDB1 - pyruvate dehydrogenase (acetyl-transferring) subunit e1 beta, DAK1 - dak1p, GDB1 - bifunctional 4-alpha-glucanotransferase/amylo-alpha-1,6-glucosidase, AMS1 - ams1p, MAL11 - mal11p, GPM2 - phosphoglycerate mutase family protein gpm2, GUT2 -…
GO:0110053	regulation of actin filament organization	0.000105	0.00443	2.83	4935	43	608	15	[CAP1 - cap1p, ARP3 - arp3p, PFY1 - pfy1p, ARC18 - arc18p, TWF1 - twf1p, ARC40 - arc40p, BBC1 - bbc1p, ARC35 - arc35p, CAP2 - cap2p, AIM7 - aim7p, PIN3 - pin3p, ARP2 - actin-related protein 2, ARC19 - arc19p, SRV2 - srv2p, ARC15 - arc15p]
GO:0006733	oxidoreduction coenzyme metabolic process	0.000124	0.00517	2.19	4935	89	608	24	[PDA1 - pyruvate dehydrogenase (acetyl-transferring) subunit e1 alpha, PNC1 - nicotinamidase, COQ4 - coq4p, MDH3 - malate dehydrogenase mdh3, PDB1 - pyruvate dehydrogenase (acetyl-transferring) subunit e1 beta, ALD4 - aldehyde dehydrogenase (nadp(+)) ald4, IDP3 - isocitrate dehydrogenase (nadp(+)) idp3, SOL4 - 6-phosphogluconolactonase sol4, NQM1 - sedoheptulose-7-phosphate:d-glyceraldehyde-3-pho…
GO:0010035	response to inorganic substance	0.000126	0.00519	2.91	4935	39	608	14	[TPS1 - alpha,alpha-trehalose-phosphate synthase (udp-forming) tps1, NCE103 - carbonate dehydratase nce103, STF2 - stf2p, UBC7 - e2 ubiquitin-conjugating protein ubc7, CTA1 - catalase a, CTT1 - catalase t, CST6 - cst6p, SIP18 - sip18p, ZWF1 - glucose-6-phosphate dehydrogenase, ATH1 - alpha,alpha-trehalase ath1, IRA2 - ira2p, NTH1 - alpha,alpha-trehalase nth1, DDR2 - ddr2p, PRX1 - prx1p]
GO:0006811	ion transport	0.000127	0.0052	1.55	4935	340	608	65	[UPS1 - ups1p, ODC2 - odc2p, COX7 - cytochrome c oxidase subunit vii, AVT6 - avt6p, PHO89 - pho89p, MNR2 - putative mg(2+) transporter mnr2, COX12 - cytochrome c oxidase subunit vib, MAL31 - mal31p, COX5A - cytochrome c oxidase subunit va, POR1 - por1p, SNF7 - snf7p, HXT6 - hxt6p, ATP18 - atp18p, HXT7 - hxt7p, CCC1 - ccc1p, PMC1 - calcium-transporting atpase pmc1, PHM7 - phm7p, HXT2 - hxt2p, ATP1…
GO:0006536	glutamate metabolic process	0.000148	0.006	4.33	4935	15	608	8	[GAD1 - glutamate decarboxylase gad1, GDH3 - glutamate dehydrogenase (nadp(+)) gdh3, CIT2 - citrate (si)-synthase cit2, CIT1 - citrate (si)-synthase cit1, CAR2 - ornithine-oxo-acid transaminase, IDH2 - isocitrate dehydrogenase (nad(+)) idh2, PUT1 - proline dehydrogenase, GDH2 - glutamate dehydrogenase (nad(+))]
GO:0010677	negative regulation of cellular carbohydrate metabolic process	0.000148	0.00595	4.33	4935	15	608	8	[PHO85 - pho85p, IGD1 - igd1p, VID30 - glucose-induced degradation complex subunit vid30, UBC8 - e2 ubiquitin-conjugating protein ubc8, FYV10 - glucose-induced degradation complex subunit fyv10, PSK1 - psk1p, GID8 - glucose-induced degradation complex subunit gid8, VID24 - glucose-induced degradation complex subunit vid24]
GO:0045912	negative regulation of carbohydrate metabolic process	0.000148	0.00591	4.33	4935	15	608	8	[PHO85 - pho85p, IGD1 - igd1p, VID30 - glucose-induced degradation complex subunit vid30, UBC8 - e2 ubiquitin-conjugating protein ubc8, FYV10 - glucose-induced degradation complex subunit fyv10, PSK1 - psk1p, GID8 - glucose-induced degradation complex subunit gid8, VID24 - glucose-induced degradation complex subunit vid24]
GO:0070873	regulation of glycogen metabolic process	0.000148	0.00586	4.33	4935	15	608	8	[PHO85 - pho85p, PCL7 - pcl7p, IGD1 - igd1p, BMH1 - bmh1p, PSK1 - psk1p, GLC7 - glc7p, PIG2 - pig2p, BMH2 - bmh2p]
GO:0006749	glutathione metabolic process	0.000181	0.00714	3.84	4935	19	608	9	[TRX2 - trx2p, ECM38 - gamma-glutamyltransferase, ECM4 - ecm4p, GRX2 - grx2p, GLR1 - glutathione-disulfide reductase glr1, YFH1 - yfh1p, GTT1 - bifunctional glutathione transferase/peroxidase, GLO1 - lactoylglutathione lyase glo1, GCG1 - gcg1p]
GO:0071465	cellular response to desiccation	0.000228	0.00893	8.12	4935	4	608	4	[TPS1 - alpha,alpha-trehalose-phosphate synthase (udp-forming) tps1, STF2 - stf2p, ATH1 - alpha,alpha-trehalase ath1, NTH1 - alpha,alpha-trehalase nth1]
GO:0006546	glycine catabolic process	0.000228	0.00887	8.12	4935	4	608	4	[GCV1 - glycine decarboxylase subunit t, GCV3 - glycine decarboxylase subunit h, LPD1 - dihydrolipoyl dehydrogenase, GCV2 - glycine decarboxylase subunit p]
GO:0051014	actin filament severing	0.000228	0.0088	8.12	4935	4	608	4	[AIM7 - aim7p, COF1 - cof1p, TWF1 - twf1p, SRV2 - srv2p]
GO:0009269	response to desiccation	0.000228	0.00874	8.12	4935	4	608	4	[TPS1 - alpha,alpha-trehalose-phosphate synthase (udp-forming) tps1, STF2 - stf2p, ATH1 - alpha,alpha-trehalase ath1, NTH1 - alpha,alpha-trehalase nth1]
GO:0016051	carbohydrate biosynthetic process	0.000275	0.0104	2.21	4935	77	608	21	[TPS1 - alpha,alpha-trehalose-phosphate synthase (udp-forming) tps1, PCK1 - phosphoenolpyruvate carboxykinase pck1, BMH1 - bmh1p, GLC3 - 1,4-alpha-glucan branching enzyme, GLG1 - glycogenin glucosyltransferase glg1, PGM2 - phosphoglucomutase pgm2, MDH2 - malate dehydrogenase mdh2, GSY2 - glycogen (starch) synthase gsy2, YIG1 - yig1p, TSL1 - tsl1p, UGP1 - utp glucose-1-phosphate uridylyltransferas…
GO:0051156	glucose 6-phosphate metabolic process	0.000294	0.0111	3.65	4935	20	608	9	[PGM2 - phosphoglucomutase pgm2, ZWF1 - glucose-6-phosphate dehydrogenase, HXK1 - hexokinase 1, SOL4 - 6-phosphogluconolactonase sol4, GLK1 - glucokinase, NQM1 - sedoheptulose-7-phosphate:d-glyceraldehyde-3-phosphate transaldolase nqm1, SOL1 - sol1p, EMI2 - putative glucokinase, SOL2 - sol2p]
GO:0007005	mitochondrion organization	0.000343	0.0128	1.76	4935	171	608	37	[ARP3 - arp3p, ATG20 - atg20p, SED1 - sed1p, SNX4 - snx4p, ATG8 - atg8p, MHR1 - mhr1p, MIM1 - mim1p, SML1 - sml1p, YFH1 - yfh1p, ATP20 - atp20p, FIS1 - fis1p, SDH3 - succinate dehydrogenase cytochrome b subunit sdh3, CRD1 - cardiolipin synthase, MGR2 - mgr2p, POR1 - por1p, RPM2 - rpm2p, ATG21 - atg21p, ABF2 - abf2p, EMI1 - emi1p, ARP2 - actin-related protein 2, ARC19 - arc19p, ARC15 - arc15p, ACO…
GO:0033108	mitochondrial respiratory chain complex assembly	0.000408	0.0151	2.64	4935	43	608	14	[RCF1 - rcf1p, COA3 - coa3p, QCR7 - ubiquinol--cytochrome-c reductase subunit 7, PET100 - pet100p, COA2 - coa2p, COX20 - cox20p, MSS51 - mss51p, COX12 - cytochrome c oxidase subunit vib, COA1 - coa1p, EMI5 - succinate dehydrogenase subunit emi5, CBP4 - cbp4p, COX16 - cox16p, MDM35 - mdm35p, COA6 - coa6p]
GO:0032881	regulation of polysaccharide metabolic process	0.000445	0.0164	3.82	4935	17	608	8	[PHO85 - pho85p, PCL7 - pcl7p, IGD1 - igd1p, BMH1 - bmh1p, PSK1 - psk1p, GLC7 - glc7p, PIG2 - pig2p, BMH2 - bmh2p]
GO:0006122	mitochondrial electron transport, ubiquinol to cytochrome c	0.000462	0.0169	4.87	4935	10	608	6	[QCR7 - ubiquinol--cytochrome-c reductase subunit 7, CYC7 - cyc7p, CYT1 - ubiquinol--cytochrome-c reductase catalytic subunit cyt1, QCR6 - ubiquinol--cytochrome-c reductase subunit 6, QCR2 - ubiquinol--cytochrome-c reductase subunit 2, QCR8 - qcr8p]
GO:0006119	oxidative phosphorylation	0.000474	0.0172	5.8	4935	7	608	5	[CYT1 - ubiquinol--cytochrome-c reductase catalytic subunit cyt1, ATP2 - atp2p, COX4 - cytochrome c oxidase subunit iv, COX12 - cytochrome c oxidase subunit vib, COX13 - cytochrome c oxidase subunit via]
GO:0042743	hydrogen peroxide metabolic process	0.000474	0.0171	5.8	4935	7	608	5	[CTT1 - catalase t, TSA2 - tsa2p, LPD1 - dihydrolipoyl dehydrogenase, CCP1 - ccp1p, CTA1 - catalase a]
GO:0072330	monocarboxylic acid biosynthetic process	0.000485	0.0174	2.13	4935	80	608	21	[ACP1 - acp1p, MCT1 - [acyl-carrier-protein] s-malonyltransferase, PDA1 - pyruvate dehydrogenase (acetyl-transferring) subunit e1 alpha, HSP31 - hsp31p, PDB1 - pyruvate dehydrogenase (acetyl-transferring) subunit e1 beta, ISA1 - isa1p, ALD4 - aldehyde dehydrogenase (nadp(+)) ald4, ETR1 - etr1p, ALD3 - aldehyde dehydrogenase (nad(+)) ald3, ALD2 - aldehyde dehydrogenase (nad(+)) ald2, EEB1 - eeb1p,…
GO:0006109	regulation of carbohydrate metabolic process	0.000506	0.018	2.71	4935	39	608	13	[PHO85 - pho85p, PCL7 - pcl7p, BMH1 - bmh1p, UBC8 - e2 ubiquitin-conjugating protein ubc8, VID30 - glucose-induced degradation complex subunit vid30, GID8 - glucose-induced degradation complex subunit gid8, PIG2 - pig2p, IGD1 - igd1p, FYV10 - glucose-induced degradation complex subunit fyv10, PSK1 - psk1p, GLC7 - glc7p, BMH2 - bmh2p, VID24 - glucose-induced degradation complex subunit vid24]
GO:0034293	sexual sporulation	0.000534	0.0189	2.4	4935	54	608	16	[BMH1 - bmh1p, GPA2 - gpa2p, HHT2 - hht2p, RIM11 - rim11p, RAS2 - ras2p, EMI5 - succinate dehydrogenase subunit emi5, FMP45 - fmp45p, HHF2 - hhf2p, GLC7 - glc7p, EMI1 - emi1p, HHF1 - hhf1p, SPS19 - sps19p, HHT1 - hht1p, UBI4 - ubiquitin, EMI2 - putative glucokinase, BMH2 - bmh2p]
GO:0043935	sexual sporulation resulting in formation of a cellular spore	0.000534	0.0187	2.4	4935	54	608	16	[BMH1 - bmh1p, GPA2 - gpa2p, HHT2 - hht2p, RIM11 - rim11p, RAS2 - ras2p, EMI5 - succinate dehydrogenase subunit emi5, FMP45 - fmp45p, HHF2 - hhf2p, GLC7 - glc7p, EMI1 - emi1p, SPS19 - sps19p, HHF1 - hhf1p, HHT1 - hht1p, UBI4 - ubiquitin, BMH2 - bmh2p, EMI2 - putative glucokinase]
GO:0006081	cellular aldehyde metabolic process	0.00054	0.0188	2.48	4935	49	608	15	[PDX3 - pyridoxamine-phosphate oxidase pdx3, HSP31 - hsp31p, MDH3 - malate dehydrogenase mdh3, IDP3 - isocitrate dehydrogenase (nadp(+)) idp3, CIT2 - citrate (si)-synthase cit2, SOL4 - 6-phosphogluconolactonase sol4, NQM1 - sedoheptulose-7-phosphate:d-glyceraldehyde-3-phosphate transaldolase nqm1, SOL1 - sol1p, GLO1 - lactoylglutathione lyase glo1, SOL2 - sol2p, HFD1 - hfd1p, GOR1 - gor1p, ZWF1 -…
GO:0032535	regulation of cellular component size	0.000607	0.021	2.25	4935	65	608	18	[CAP1 - cap1p, ARP3 - arp3p, ARC18 - arc18p, PFY1 - pfy1p, GPA2 - gpa2p, TWF1 - twf1p, PEX11 - pex11p, BBC1 - bbc1p, ARC40 - arc40p, ARC35 - arc35p, AIM7 - aim7p, CAP2 - cap2p, PIN3 - pin3p, PTK2 - ptk2p, ARP2 - actin-related protein 2, ARC19 - arc19p, SRV2 - srv2p, ARC15 - arc15p]
GO:0090066	regulation of anatomical structure size	0.000607	0.0209	2.25	4935	65	608	18	[CAP1 - cap1p, ARP3 - arp3p, PFY1 - pfy1p, ARC18 - arc18p, GPA2 - gpa2p, TWF1 - twf1p, PEX11 - pex11p, ARC40 - arc40p, BBC1 - bbc1p, AIM7 - aim7p, ARC35 - arc35p, CAP2 - cap2p, PIN3 - pin3p, PTK2 - ptk2p, ARP2 - actin-related protein 2, ARC19 - arc19p, SRV2 - srv2p, ARC15 - arc15p]
GO:0072524	pyridine-containing compound metabolic process	0.000628	0.0215	2.05	4935	87	608	22	[PDA1 - pyruvate dehydrogenase (acetyl-transferring) subunit e1 alpha, PDX3 - pyridoxamine-phosphate oxidase pdx3, PNC1 - nicotinamidase, MDH3 - malate dehydrogenase mdh3, PDB1 - pyruvate dehydrogenase (acetyl-transferring) subunit e1 beta, ALD4 - aldehyde dehydrogenase (nadp(+)) ald4, IDP3 - isocitrate dehydrogenase (nadp(+)) idp3, SOL4 - 6-phosphogluconolactonase sol4, NQM1 - sedoheptulose-7-ph…
GO:0019362	pyridine nucleotide metabolic process	0.000634	0.0215	2.14	4935	76	608	20	[PDA1 - pyruvate dehydrogenase (acetyl-transferring) subunit e1 alpha, PNC1 - nicotinamidase, MDH3 - malate dehydrogenase mdh3, PDB1 - pyruvate dehydrogenase (acetyl-transferring) subunit e1 beta, ALD4 - aldehyde dehydrogenase (nadp(+)) ald4, IDP3 - isocitrate dehydrogenase (nadp(+)) idp3, SOL4 - 6-phosphogluconolactonase sol4, NQM1 - sedoheptulose-7-phosphate:d-glyceraldehyde-3-phosphate transal…
GO:0034637	cellular carbohydrate biosynthetic process	0.000641	0.0216	2.3	4935	60	608	17	[TPS1 - alpha,alpha-trehalose-phosphate synthase (udp-forming) tps1, BMH1 - bmh1p, GLC3 - 1,4-alpha-glucan branching enzyme, GLG1 - glycogenin glucosyltransferase glg1, PGM2 - phosphoglucomutase pgm2, GSY2 - glycogen (starch) synthase gsy2, YIG1 - yig1p, TSL1 - tsl1p, UGP1 - utp glucose-1-phosphate uridylyltransferase, GDB1 - bifunctional 4-alpha-glucanotransferase/amylo-alpha-1,6-glucosidase, KE…
GO:0017004	cytochrome complex assembly	0.000666	0.0223	2.64	4935	40	608	13	[RCF1 - rcf1p, COA3 - coa3p, QCR7 - ubiquinol--cytochrome-c reductase subunit 7, PET100 - pet100p, COA2 - coa2p, COX20 - cox20p, COX12 - cytochrome c oxidase subunit vib, MSS51 - mss51p, COA1 - coa1p, CYC3 - holocytochrome c synthase cyc3, CBP4 - cbp4p, COX16 - cox16p, COA6 - coa6p]
GO:0000302	response to reactive oxygen species	0.000715	0.0238	3.61	4935	18	608	8	[CTT1 - catalase t, HSP42 - hsp42p, ZWF1 - glucose-6-phosphate dehydrogenase, SOD1 - sod1p, IRA2 - ira2p, CCP1 - ccp1p, CTA1 - catalase a, DDR2 - ddr2p]
GO:0006796	phosphate-containing compound metabolic process	0.000855	0.0283	1.32	4935	644	608	105	[TPS1 - alpha,alpha-trehalose-phosphate synthase (udp-forming) tps1, UPS1 - ups1p, SUR1 - mannosylinositol phosphorylceramide synthase catalytic subunit sur1, FAD1 - fmn adenylyltransferase, TSL1 - tsl1p, RIM11 - rim11p, GPT2 - bifunctional glycerol-3-phosphate/glycerone-phosphate o-acyltransferase gpt2, GPD1 - glycerol-3-phosphate dehydrogenase (nad(+)) gpd1, PBN1 - pbn1p, GPM2 - phosphoglycerat…
GO:0006793	phosphorus metabolic process	0.000883	0.029	1.32	4935	659	608	107	[TPS1 - alpha,alpha-trehalose-phosphate synthase (udp-forming) tps1, UPS1 - ups1p, SUR1 - mannosylinositol phosphorylceramide synthase catalytic subunit sur1, FAD1 - fmn adenylyltransferase, TSL1 - tsl1p, RIM11 - rim11p, GPT2 - bifunctional glycerol-3-phosphate/glycerone-phosphate o-acyltransferase gpt2, PBN1 - pbn1p, GPD1 - glycerol-3-phosphate dehydrogenase (nad(+)) gpd1, GPM2 - phosphoglycerat…
GO:0008535	respiratory chain complex IV assembly	0.000886	0.0289	3.01	4935	27	608	10	[COA1 - coa1p, RCF1 - rcf1p, COA3 - coa3p, COA2 - coa2p, PET100 - pet100p, COX20 - cox20p, MSS51 - mss51p, COX12 - cytochrome c oxidase subunit vib, COX16 - cox16p, COA6 - coa6p]
GO:0033617	mitochondrial respiratory chain complex IV assembly	0.000886	0.0288	3.01	4935	27	608	10	[COA1 - coa1p, RCF1 - rcf1p, COA3 - coa3p, COA2 - coa2p, PET100 - pet100p, COX20 - cox20p, COX12 - cytochrome c oxidase subunit vib, MSS51 - mss51p, COX16 - cox16p, COA6 - coa6p]

## Sheet: nongrowing_cluster3
GO Term	Description	P-value	FDR q-value	Enrichment	N	B	n	b	Genes
GO:0002181	cytoplasmic translation	1.41e-111	7.29e-108	10.52	4935	150	372	119	[RPL2B - ribosomal 60s subunit protein l2b, RPL2A - ribosomal 60s subunit protein l2a, RPS4A - rps4ap, RBG1 - rbg1p, RPS26B - ribosomal 40s subunit protein s26b, RPL1B - ribosomal 60s subunit protein l1b, RPL9A - ribosomal 60s subunit protein l9a, RPL23B - ribosomal 60s subunit protein l23b, RPL13B - ribosomal 60s subunit protein l13b, RPS16A - ribosomal 40s subunit protein s16a, RPL37B - ribosom…
GO:0006412	translation	3.38e-94	8.73e-91	6.15	4935	332	372	154	[RPL2B - ribosomal 60s subunit protein l2b, RPL2A - ribosomal 60s subunit protein l2a, RPS4A - rps4ap, FUN12 - fun12p, RPS26B - ribosomal 40s subunit protein s26b, RBG1 - rbg1p, RPL1B - ribosomal 60s subunit protein l1b, RPL9A - ribosomal 60s subunit protein l9a, RPL23B - ribosomal 60s subunit protein l23b, PRT1 - prt1p, GRS1 - glycine--trna ligase, RPL13B - ribosomal 60s subunit protein l13b, RP…
GO:0043043	peptide biosynthetic process	1.87e-93	3.22e-90	6.1	4935	335	372	154	[RPL2B - ribosomal 60s subunit protein l2b, RPL2A - ribosomal 60s subunit protein l2a, RPS4A - rps4ap, FUN12 - fun12p, RPS26B - ribosomal 40s subunit protein s26b, RBG1 - rbg1p, RPL1B - ribosomal 60s subunit protein l1b, RPL9A - ribosomal 60s subunit protein l9a, RPL23B - ribosomal 60s subunit protein l23b, PRT1 - prt1p, GRS1 - glycine--trna ligase, RPL13B - ribosomal 60s subunit protein l13b, RP…
GO:0043604	amide biosynthetic process	1.18e-89	1.53e-86	5.54	4935	383	372	160	[RPL2B - ribosomal 60s subunit protein l2b, RPL2A - ribosomal 60s subunit protein l2a, RPS4A - rps4ap, FUN12 - fun12p, RPS26B - ribosomal 40s subunit protein s26b, RBG1 - rbg1p, RPL1B - ribosomal 60s subunit protein l1b, RPL9A - ribosomal 60s subunit protein l9a, RPL23B - ribosomal 60s subunit protein l23b, PRT1 - prt1p, GRS1 - glycine--trna ligase, RPL13B - ribosomal 60s subunit protein l13b, RP…
GO:0006518	peptide metabolic process	2.55e-86	2.63e-83	5.58	4935	366	372	154	[RPL2B - ribosomal 60s subunit protein l2b, RPL2A - ribosomal 60s subunit protein l2a, RPS4A - rps4ap, FUN12 - fun12p, RPS26B - ribosomal 40s subunit protein s26b, RBG1 - rbg1p, RPL1B - ribosomal 60s subunit protein l1b, RPL9A - ribosomal 60s subunit protein l9a, RPL23B - ribosomal 60s subunit protein l23b, PRT1 - prt1p, GRS1 - glycine--trna ligase, RPL13B - ribosomal 60s subunit protein l13b, RP…
GO:0043603	cellular amide metabolic process	3.01e-80	2.59e-77	4.82	4935	449	372	163	[RPL2B - ribosomal 60s subunit protein l2b, RPL2A - ribosomal 60s subunit protein l2a, RPS4A - rps4ap, FUN12 - fun12p, RBG1 - rbg1p, RPS26B - ribosomal 40s subunit protein s26b, RPL1B - ribosomal 60s subunit protein l1b, RPL9A - ribosomal 60s subunit protein l9a, RPL23B - ribosomal 60s subunit protein l23b, GRS1 - glycine--trna ligase, PRT1 - prt1p, RPL13B - ribosomal 60s subunit protein l13b, RP…
GO:1901566	organonitrogen compound biosynthetic process	5.47e-77	4.04e-74	3.62	4935	737	372	201	[RPS26B - ribosomal 40s subunit protein s26b, RPL1B - ribosomal 60s subunit protein l1b, ARO2 - bifunctional chorismate synthase/riboflavin reductase [nad(p)h] aro2, RPL9A - ribosomal 60s subunit protein l9a, RPL23B - ribosomal 60s subunit protein l23b, PSA1 - mannose-1-phosphate guanylyltransferase, PRT1 - prt1p, RPL13B - ribosomal 60s subunit protein l13b, RPS16A - ribosomal 40s subunit protein…
GO:0044271	cellular nitrogen compound biosynthetic process	6.96e-65	4.49e-62	3.14	4935	848	372	201	[RPS26B - ribosomal 40s subunit protein s26b, RPL1B - ribosomal 60s subunit protein l1b, RPL9A - ribosomal 60s subunit protein l9a, RPL23B - ribosomal 60s subunit protein l23b, PSA1 - mannose-1-phosphate guanylyltransferase, PRT1 - prt1p, RPL13B - ribosomal 60s subunit protein l13b, RPS16A - ribosomal 40s subunit protein s16a, RPL37B - ribosomal 60s subunit protein l37b, ALA1 - alanine--trna liga…
GO:0034645	cellular macromolecule biosynthetic process	3.69e-61	2.11e-58	3.5	4935	655	372	173	[RPL2B - ribosomal 60s subunit protein l2b, RPL2A - ribosomal 60s subunit protein l2a, RPS4A - rps4ap, FUN12 - fun12p, RBG1 - rbg1p, RPS26B - ribosomal 40s subunit protein s26b, RPL1B - ribosomal 60s subunit protein l1b, RPL9A - ribosomal 60s subunit protein l9a, RPL23B - ribosomal 60s subunit protein l23b, GRS1 - glycine--trna ligase, PSA1 - mannose-1-phosphate guanylyltransferase, PRT1 - prt1p,…
GO:0034641	cellular nitrogen compound metabolic process	1.4e-58	7.21e-56	2.1	4935	1769	372	280	[NSA2 - nsa2p, RRB1 - rrb1p, RPS26B - ribosomal 40s subunit protein s26b, RPL1B - ribosomal 60s subunit protein l1b, LHP1 - lhp1p, KRR1 - krr1p, RPL9A - ribosomal 60s subunit protein l9a, RPL23B - ribosomal 60s subunit protein l23b, PRT1 - prt1p, PSA1 - mannose-1-phosphate guanylyltransferase, RPL13B - ribosomal 60s subunit protein l13b, RPS16A - ribosomal 40s subunit protein s16a, PWP1 - pwp1p, …
GO:0044249	cellular biosynthetic process	5.59e-57	2.62e-54	2.45	4935	1279	372	236	[RPS26B - ribosomal 40s subunit protein s26b, RPL1B - ribosomal 60s subunit protein l1b, ARO2 - bifunctional chorismate synthase/riboflavin reductase [nad(p)h] aro2, RPL9A - ribosomal 60s subunit protein l9a, RPL23B - ribosomal 60s subunit protein l23b, PSA1 - mannose-1-phosphate guanylyltransferase, PRT1 - prt1p, RPL13B - ribosomal 60s subunit protein l13b, RPS16A - ribosomal 40s subunit protein…
GO:0009058	biosynthetic process	1.94e-55	8.34e-53	2.38	4935	1333	372	239	[RPS26B - ribosomal 40s subunit protein s26b, RPL1B - ribosomal 60s subunit protein l1b, ARO2 - bifunctional chorismate synthase/riboflavin reductase [nad(p)h] aro2, RPL9A - ribosomal 60s subunit protein l9a, RPL23B - ribosomal 60s subunit protein l23b, PSA1 - mannose-1-phosphate guanylyltransferase, PRT1 - prt1p, RPL13B - ribosomal 60s subunit protein l13b, RPS16A - ribosomal 40s subunit protein…
GO:1901576	organic substance biosynthetic process	5.66e-55	2.25e-52	2.39	4935	1318	372	237	[RPS26B - ribosomal 40s subunit protein s26b, RPL1B - ribosomal 60s subunit protein l1b, ARO2 - bifunctional chorismate synthase/riboflavin reductase [nad(p)h] aro2, RPL9A - ribosomal 60s subunit protein l9a, RPL23B - ribosomal 60s subunit protein l23b, PSA1 - mannose-1-phosphate guanylyltransferase, PRT1 - prt1p, RPL13B - ribosomal 60s subunit protein l13b, RPS16A - ribosomal 40s subunit protein…
GO:0009059	macromolecule biosynthetic process	1.16e-53	4.29e-51	3.14	4935	735	372	174	[RPL2B - ribosomal 60s subunit protein l2b, RPL2A - ribosomal 60s subunit protein l2a, RPS4A - rps4ap, FUN12 - fun12p, RBG1 - rbg1p, RPS26B - ribosomal 40s subunit protein s26b, RPL1B - ribosomal 60s subunit protein l1b, RPL9A - ribosomal 60s subunit protein l9a, RPL23B - ribosomal 60s subunit protein l23b, GRS1 - glycine--trna ligase, PSA1 - mannose-1-phosphate guanylyltransferase, PRT1 - prt1p,…
GO:0022613	ribonucleoprotein complex biogenesis	3.67e-53	1.26e-50	5.82	4935	219	372	96	[RPS0B - ribosomal 40s subunit protein s0b, NSA2 - nsa2p, RRB1 - rrb1p, RPB8 - rpb8p, KRR1 - krr1p, RPL40A - ubiquitin-ribosomal 60s subunit protein l40a fusion protein, PUF6 - puf6p, RRP8 - rrp8p, NOP7 - nop7p, NOP56 - nop56p, UTP10 - utp10p, SPB1 - spb1p, NUG1 - nug1p, RPA43 - rpa43p, BRX1 - brx1p, NOC2 - noc2p, NOP4 - nop4p, RPA190 - rpa190p, RPL26A - ribosomal 60s subunit protein l26a, RPS19B…
GO:0044085	cellular component biogenesis	3.41e-48	1.1e-45	5.24	4935	243	372	96	[RPS0B - ribosomal 40s subunit protein s0b, NSA2 - nsa2p, RRB1 - rrb1p, RPB8 - rpb8p, KRR1 - krr1p, RPL40A - ubiquitin-ribosomal 60s subunit protein l40a fusion protein, PUF6 - puf6p, RRP8 - rrp8p, NOP7 - nop7p, NOP56 - nop56p, UTP10 - utp10p, SPB1 - spb1p, NUG1 - nug1p, RPA43 - rpa43p, BRX1 - brx1p, NOC2 - noc2p, NOP4 - nop4p, RPA190 - rpa190p, RPL26A - ribosomal 60s subunit protein l26a, RPS19B…
GO:0042254	ribosome biogenesis	1.55e-43	4.71e-41	5.61	4935	194	372	82	[RPS0B - ribosomal 40s subunit protein s0b, NSA2 - nsa2p, RRB1 - rrb1p, RPB8 - rpb8p, KRR1 - krr1p, RPL40A - ubiquitin-ribosomal 60s subunit protein l40a fusion protein, NOP56 - nop56p, NOP7 - nop7p, UTP10 - utp10p, SPB1 - spb1p, NUG1 - nug1p, RPA43 - rpa43p, BRX1 - brx1p, NOC2 - noc2p, RPA190 - rpa190p, NOP4 - nop4p, RPS19B - ribosomal 40s subunit protein s19b, ENP1 - enp1p, ALB1 - alb1p, RPP0 -…
GO:0006364	rRNA processing	7.8e-43	2.24e-40	4.76	4935	262	372	94	[RPS0B - ribosomal 40s subunit protein s0b, NSA2 - nsa2p, RPL30 - ribosomal 60s subunit protein l30, RRB1 - rrb1p, FUN12 - fun12p, RPL1B - ribosomal 60s subunit protein l1b, ZUO1 - zuo1p, KRR1 - krr1p, RRP8 - rrp8p, RPS16A - ribosomal 40s subunit protein s16a, PWP1 - pwp1p, NOP7 - nop7p, NOP56 - nop56p, UTP10 - utp10p, SPB1 - spb1p, NUG1 - nug1p, RPL35A - ribosomal 60s subunit protein l35a, BRX1 …
GO:0016072	rRNA metabolic process	1.04e-42	2.83e-40	4.41	4935	304	372	101	[NSA2 - nsa2p, RRB1 - rrb1p, FUN12 - fun12p, RPL1B - ribosomal 60s subunit protein l1b, KRR1 - krr1p, PWP1 - pwp1p, RPS16A - ribosomal 40s subunit protein s16a, NOP56 - nop56p, NOP7 - nop7p, UTP10 - utp10p, SPB1 - spb1p, RPA43 - rpa43p, RPS21A - ribosomal 40s subunit protein s21a, RPA190 - rpa190p, NOP4 - nop4p, RPS23A - ribosomal 40s subunit protein s23a, RPL3 - ribosomal 60s subunit protein l3,…
GO:0034660	ncRNA metabolic process	5.8e-42	1.5e-39	3.5	4935	477	372	126	[NSA2 - nsa2p, RRB1 - rrb1p, FUN12 - fun12p, RPL1B - ribosomal 60s subunit protein l1b, LHP1 - lhp1p, KRR1 - krr1p, GRS1 - glycine--trna ligase, RPS16A - ribosomal 40s subunit protein s16a, PWP1 - pwp1p, NOP7 - nop7p, NOP56 - nop56p, UTP10 - utp10p, SPB1 - spb1p, ALA1 - alanine--trna ligase, RPA43 - rpa43p, RPS21A - ribosomal 40s subunit protein s21a, NOP4 - nop4p, RPA190 - rpa190p, RPS23A - ribo…
GO:0006807	nitrogen compound metabolic process	2.14e-32	5.26e-30	1.52	4935	2670	372	306	[NSA2 - nsa2p, RRB1 - rrb1p, RPS26B - ribosomal 40s subunit protein s26b, RPL1B - ribosomal 60s subunit protein l1b, ARO2 - bifunctional chorismate synthase/riboflavin reductase [nad(p)h] aro2, LHP1 - lhp1p, RPL9A - ribosomal 60s subunit protein l9a, KRR1 - krr1p, RPL23B - ribosomal 60s subunit protein l23b, PRT1 - prt1p, PSA1 - mannose-1-phosphate guanylyltransferase, RPL13B - ribosomal 60s subu…
GO:0044238	primary metabolic process	4.94e-32	1.16e-29	1.47	4935	2858	372	317	[NSA2 - nsa2p, RRB1 - rrb1p, RPS26B - ribosomal 40s subunit protein s26b, RPL1B - ribosomal 60s subunit protein l1b, ARO2 - bifunctional chorismate synthase/riboflavin reductase [nad(p)h] aro2, LHP1 - lhp1p, RPL9A - ribosomal 60s subunit protein l9a, KRR1 - krr1p, RPL23B - ribosomal 60s subunit protein l23b, PRT1 - prt1p, PSA1 - mannose-1-phosphate guanylyltransferase, RPL13B - ribosomal 60s subu…
GO:0034470	ncRNA processing	5.26e-32	1.18e-29	3.49	4935	376	372	99	[NSA2 - nsa2p, RRB1 - rrb1p, FUN12 - fun12p, RPL1B - ribosomal 60s subunit protein l1b, LHP1 - lhp1p, KRR1 - krr1p, PWP1 - pwp1p, RPS16A - ribosomal 40s subunit protein s16a, NOP56 - nop56p, NOP7 - nop7p, UTP10 - utp10p, SPB1 - spb1p, ALA1 - alanine--trna ligase, RPS21A - ribosomal 40s subunit protein s21a, NOP4 - nop4p, RPS23A - ribosomal 40s subunit protein s23a, RPL3 - ribosomal 60s subunit pr…
GO:0071704	organic substance metabolic process	7.25e-31	1.56e-28	1.43	4935	2990	372	323	[NSA2 - nsa2p, RRB1 - rrb1p, RPS26B - ribosomal 40s subunit protein s26b, RPL1B - ribosomal 60s subunit protein l1b, ARO2 - bifunctional chorismate synthase/riboflavin reductase [nad(p)h] aro2, LHP1 - lhp1p, RPL9A - ribosomal 60s subunit protein l9a, KRR1 - krr1p, RPL23B - ribosomal 60s subunit protein l23b, PRT1 - prt1p, PSA1 - mannose-1-phosphate guanylyltransferase, RPL13B - ribosomal 60s subu…
GO:0044237	cellular metabolic process	9.09e-31	1.88e-28	1.42	4935	3045	372	326	[NSA2 - nsa2p, RRB1 - rrb1p, RPS26B - ribosomal 40s subunit protein s26b, RPL1B - ribosomal 60s subunit protein l1b, ARO2 - bifunctional chorismate synthase/riboflavin reductase [nad(p)h] aro2, LHP1 - lhp1p, RPL9A - ribosomal 60s subunit protein l9a, KRR1 - krr1p, RPL23B - ribosomal 60s subunit protein l23b, PRT1 - prt1p, PSA1 - mannose-1-phosphate guanylyltransferase, RPL13B - ribosomal 60s subu…
GO:0008152	metabolic process	2.27e-28	4.51e-26	1.37	4935	3198	372	331	[NSA2 - nsa2p, RRB1 - rrb1p, RPS26B - ribosomal 40s subunit protein s26b, RPL1B - ribosomal 60s subunit protein l1b, LHP1 - lhp1p, ARO2 - bifunctional chorismate synthase/riboflavin reductase [nad(p)h] aro2, KRR1 - krr1p, RPL9A - ribosomal 60s subunit protein l9a, RPL23B - ribosomal 60s subunit protein l23b, PRT1 - prt1p, PSA1 - mannose-1-phosphate guanylyltransferase, RPL13B - ribosomal 60s subu…
GO:0044267	cellular protein metabolic process	3.98e-24	7.61e-22	2.03	4935	1078	372	165	[RPL2B - ribosomal 60s subunit protein l2b, RPL2A - ribosomal 60s subunit protein l2a, RPS4A - rps4ap, FUN12 - fun12p, RPS26B - ribosomal 40s subunit protein s26b, RBG1 - rbg1p, RPL1B - ribosomal 60s subunit protein l1b, RPL9A - ribosomal 60s subunit protein l9a, RPL23B - ribosomal 60s subunit protein l23b, GRS1 - glycine--trna ligase, PRT1 - prt1p, PSA1 - mannose-1-phosphate guanylyltransferase,…
GO:1901564	organonitrogen compound metabolic process	6.22e-24	1.15e-21	1.69	4935	1779	372	226	[RPS26B - ribosomal 40s subunit protein s26b, RPL1B - ribosomal 60s subunit protein l1b, ARO2 - bifunctional chorismate synthase/riboflavin reductase [nad(p)h] aro2, RPL9A - ribosomal 60s subunit protein l9a, RPL23B - ribosomal 60s subunit protein l23b, PRT1 - prt1p, PSA1 - mannose-1-phosphate guanylyltransferase, RPL13B - ribosomal 60s subunit protein l13b, RPS16A - ribosomal 40s subunit protein…
GO:0043170	macromolecule metabolic process	5.02e-23	8.93e-21	1.54	4935	2233	372	259	[NSA2 - nsa2p, RRB1 - rrb1p, RPS26B - ribosomal 40s subunit protein s26b, RPL1B - ribosomal 60s subunit protein l1b, LHP1 - lhp1p, KRR1 - krr1p, RPL9A - ribosomal 60s subunit protein l9a, RPL23B - ribosomal 60s subunit protein l23b, PRT1 - prt1p, PSA1 - mannose-1-phosphate guanylyltransferase, RPL13B - ribosomal 60s subunit protein l13b, RPS16A - ribosomal 40s subunit protein s16a, PWP1 - pwp1p, …
GO:0022618	ribonucleoprotein complex assembly	1.27e-22	2.19e-20	4.16	4935	185	372	58	[RPS0B - ribosomal 40s subunit protein s0b, RPL24A - ribosomal 60s subunit protein l24a, FUN12 - fun12p, RPS26B - ribosomal 40s subunit protein s26b, RPL40A - ubiquitin-ribosomal 60s subunit protein l40a fusion protein, PRT1 - prt1p, TIF11 - tif11p, BRX1 - brx1p, RPS19B - ribosomal 40s subunit protein s19b, RPL11A - ribosomal 60s subunit protein l11a, RPP0 - ribosomal protein p0, SQT1 - sqt1p, RP…
GO:0016070	RNA metabolic process	3.64e-22	6.06e-20	2.17	4935	844	372	138	[NSA2 - nsa2p, RRB1 - rrb1p, FUN12 - fun12p, RPL1B - ribosomal 60s subunit protein l1b, LHP1 - lhp1p, KRR1 - krr1p, GRS1 - glycine--trna ligase, PWP1 - pwp1p, RPS16A - ribosomal 40s subunit protein s16a, RPL37B - ribosomal 60s subunit protein l37b, NOP56 - nop56p, NOP7 - nop7p, UTP10 - utp10p, ALA1 - alanine--trna ligase, SPB1 - spb1p, RPA43 - rpa43p, RPS21A - ribosomal 40s subunit protein s21a, …
GO:0071826	ribonucleoprotein complex subunit organization	4.03e-22	6.51e-20	4.01	4935	195	372	59	[RPS0B - ribosomal 40s subunit protein s0b, RPL24A - ribosomal 60s subunit protein l24a, FUN12 - fun12p, RPS26B - ribosomal 40s subunit protein s26b, RPL40A - ubiquitin-ribosomal 60s subunit protein l40a fusion protein, TIF11 - tif11p, PRT1 - prt1p, BRX1 - brx1p, RPS19B - ribosomal 40s subunit protein s19b, RPL11A - ribosomal 60s subunit protein l11a, RPP0 - ribosomal protein p0, RPL40B - ubiquit…
GO:0006396	RNA processing	2.58e-20	4.04e-18	2.51	4935	534	372	101	[NSA2 - nsa2p, RRB1 - rrb1p, FUN12 - fun12p, RPL1B - ribosomal 60s subunit protein l1b, LHP1 - lhp1p, KRR1 - krr1p, RPS16A - ribosomal 40s subunit protein s16a, PWP1 - pwp1p, NOP7 - nop7p, NOP56 - nop56p, UTP10 - utp10p, SPB1 - spb1p, ALA1 - alanine--trna ligase, RPS21A - ribosomal 40s subunit protein s21a, NOP4 - nop4p, RPS23A - ribosomal 40s subunit protein s23a, RPL3 - ribosomal 60s subunit pr…
GO:0042273	ribosomal large subunit biogenesis	6.88e-20	1.04e-17	7.4	4935	52	372	29	[NSA2 - nsa2p, RPL14A - ribosomal 60s subunit protein l14a, RPL7B - ribosomal 60s subunit protein l7b, RPL26B - ribosomal 60s subunit protein l26b, RRS1 - rrs1p, NIP7 - nip7p, PUF6 - puf6p, RPL7A - ribosomal 60s subunit protein l7a, RRP8 - rrp8p, NOP7 - nop7p, MAK11 - mak11p, NOC2 - noc2p, EBP2 - ebp2p, NOP4 - nop4p, RPL26A - ribosomal 60s subunit protein l26a, ALB1 - alb1p, YTM1 - ytm1p, MRT4 - …
GO:0019538	protein metabolic process	2.67e-19	3.94e-17	1.81	4935	1264	372	172	[RPL2B - ribosomal 60s subunit protein l2b, RPL2A - ribosomal 60s subunit protein l2a, RPS4A - rps4ap, FUN12 - fun12p, RPS26B - ribosomal 40s subunit protein s26b, RBG1 - rbg1p, RPL1B - ribosomal 60s subunit protein l1b, RPL9A - ribosomal 60s subunit protein l9a, RPL23B - ribosomal 60s subunit protein l23b, GRS1 - glycine--trna ligase, PRT1 - prt1p, PSA1 - mannose-1-phosphate guanylyltransferase,…
GO:0030490	maturation of SSU-rRNA	5.04e-19	7.23e-17	5.55	4935	86	372	36	[RPS1B - ribosomal 40s subunit protein s1b, RPS9B - ribosomal 40s subunit protein s9b, FUN12 - fun12p, RPS11A - ribosomal 40s subunit protein s11a, TSR4 - tsr4p, RPS16A - ribosomal 40s subunit protein s16a, NOP7 - nop7p, UTP10 - utp10p, RPS11B - ribosomal 40s subunit protein s11b, SOF1 - sof1p, RPS24B - ribosomal 40s subunit protein s24b, RPS14B - rps14bp, RPS27A - ribosomal 40s subunit protein s…
GO:0000462	maturation of SSU-rRNA from tricistronic rRNA transcript (SSU-rRNA, 5.8S rRNA, LSU-rRNA)	5.79e-18	8.08e-16	5.9	4935	72	372	32	[RPS1B - ribosomal 40s subunit protein s1b, RPS9B - ribosomal 40s subunit protein s9b, FUN12 - fun12p, RPS11A - ribosomal 40s subunit protein s11a, RPS16A - ribosomal 40s subunit protein s16a, NOP7 - nop7p, UTP10 - utp10p, RPS11B - ribosomal 40s subunit protein s11b, SOF1 - sof1p, RPS24B - ribosomal 40s subunit protein s24b, RPS14B - rps14bp, RPS27A - ribosomal 40s subunit protein s27a, RPS6B - r…
GO:0006139	nucleobase-containing compound metabolic process	2.49e-17	3.39e-15	1.7	4935	1396	372	179	[NSA2 - nsa2p, RRB1 - rrb1p, FUN12 - fun12p, RPL1B - ribosomal 60s subunit protein l1b, URA5 - orotate phosphoribosyltransferase ura5, LHP1 - lhp1p, KRR1 - krr1p, ADK1 - adenylate kinase adk1, GRS1 - glycine--trna ligase, PSA1 - mannose-1-phosphate guanylyltransferase, PWP1 - pwp1p, RPS16A - ribosomal 40s subunit protein s16a, RPL37B - ribosomal 60s subunit protein l37b, NOP56 - nop56p, NOP7 - no…
GO:0000027	ribosomal large subunit assembly	2.57e-17	3.4e-15	7.77	4935	41	372	24	[RPL25 - ribosomal 60s subunit protein l25, RPL6A - ribosomal 60s subunit protein l6a, RPL40B - ubiquitin-ribosomal 60s subunit protein l40b fusion protein, RPL24A - ribosomal 60s subunit protein l24a, SQT1 - sqt1p, RPL3 - ribosomal 60s subunit protein l3, RLP24 - rlp24p, RPL40A - ubiquitin-ribosomal 60s subunit protein l40a fusion protein, RPL10 - ribosomal 60s subunit protein l10, MDN1 - aaa fa…
GO:1901360	organic cyclic compound metabolic process	2.24e-16	2.89e-14	1.63	4935	1541	372	189	[NSA2 - nsa2p, RRB1 - rrb1p, FUN12 - fun12p, RPL1B - ribosomal 60s subunit protein l1b, URA5 - orotate phosphoribosyltransferase ura5, ARO2 - bifunctional chorismate synthase/riboflavin reductase [nad(p)h] aro2, LHP1 - lhp1p, KRR1 - krr1p, ADK1 - adenylate kinase adk1, GRS1 - glycine--trna ligase, PSA1 - mannose-1-phosphate guanylyltransferase, PWP1 - pwp1p, RPS16A - ribosomal 40s subunit protein…
GO:0006725	cellular aromatic compound metabolic process	3.53e-16	4.44e-14	1.64	4935	1476	372	183	[NSA2 - nsa2p, RRB1 - rrb1p, FUN12 - fun12p, RPL1B - ribosomal 60s subunit protein l1b, URA5 - orotate phosphoribosyltransferase ura5, LHP1 - lhp1p, ARO2 - bifunctional chorismate synthase/riboflavin reductase [nad(p)h] aro2, KRR1 - krr1p, ADK1 - adenylate kinase adk1, GRS1 - glycine--trna ligase, PSA1 - mannose-1-phosphate guanylyltransferase, PWP1 - pwp1p, RPS16A - ribosomal 40s subunit protein…
GO:0000028	ribosomal small subunit assembly	1.23e-15	1.51e-13	9.55	4935	25	372	18	[RPS0B - ribosomal 40s subunit protein s0b, RPS19A - ribosomal 40s subunit protein s19a, RPS14A - ribosomal 40s subunit protein s14a, RPS11A - ribosomal 40s subunit protein s11a, RPS31 - ubiquitin-ribosomal 40s subunit protein s31 fusion protein, RPS10A - ribosomal 40s subunit protein s10a, RPS10B - ribosomal 40s subunit protein s10b, NSR1 - nsr1p, RPS15 - ribosomal 40s subunit protein s15, RPS11…
GO:0046483	heterocycle metabolic process	2.13e-15	2.56e-13	1.62	4935	1488	372	182	[NSA2 - nsa2p, RRB1 - rrb1p, FUN12 - fun12p, RPL1B - ribosomal 60s subunit protein l1b, URA5 - orotate phosphoribosyltransferase ura5, LHP1 - lhp1p, KRR1 - krr1p, ADK1 - adenylate kinase adk1, GRS1 - glycine--trna ligase, PSA1 - mannose-1-phosphate guanylyltransferase, PWP1 - pwp1p, RPS16A - ribosomal 40s subunit protein s16a, RPL37B - ribosomal 60s subunit protein l37b, NOP56 - nop56p, NOP7 - no…
GO:0006407	rRNA export from nucleus	7.31e-15	8.58e-13	11.06	4935	18	372	15	[RPS0B - ribosomal 40s subunit protein s0b, RPS3 - ribosomal 40s subunit protein s3, RPS19A - ribosomal 40s subunit protein s19a, RPS26B - ribosomal 40s subunit protein s26b, RPS18B - ribosomal 40s subunit protein s18b, RPS10A - ribosomal 40s subunit protein s10a, RPS10B - ribosomal 40s subunit protein s10b, RPS15 - ribosomal 40s subunit protein s15, RPS0A - ribosomal 40s subunit protein s0a, RPS…
GO:0051029	rRNA transport	7.31e-15	8.38e-13	11.06	4935	18	372	15	[RPS0B - ribosomal 40s subunit protein s0b, RPS3 - ribosomal 40s subunit protein s3, RPS19A - ribosomal 40s subunit protein s19a, RPS26B - ribosomal 40s subunit protein s26b, RPS18B - ribosomal 40s subunit protein s18b, RPS10A - ribosomal 40s subunit protein s10a, RPS10B - ribosomal 40s subunit protein s10b, RPS15 - ribosomal 40s subunit protein s15, RPS0A - ribosomal 40s subunit protein s0a, RPS…
GO:0006405	RNA export from nucleus	8.11e-15	9.11e-13	4.1	4935	123	372	38	[RPS0B - ribosomal 40s subunit protein s0b, RPS3 - ribosomal 40s subunit protein s3, RPS26B - ribosomal 40s subunit protein s26b, RPL1B - ribosomal 60s subunit protein l1b, RRS1 - rrs1p, ZUO1 - zuo1p, RPS10A - ribosomal 40s subunit protein s10a, RPL40A - ubiquitin-ribosomal 60s subunit protein l40a fusion protein, RPL1A - ribosomal 60s subunit protein l1a, LTV1 - ltv1p, NUG1 - nug1p, RPS18A - rib…
GO:0044260	cellular macromolecule metabolic process	1.13e-14	1.24e-12	1.52	4935	1778	372	204	[RPS26B - ribosomal 40s subunit protein s26b, RPL1B - ribosomal 60s subunit protein l1b, RPL9A - ribosomal 60s subunit protein l9a, RPL23B - ribosomal 60s subunit protein l23b, PSA1 - mannose-1-phosphate guanylyltransferase, PRT1 - prt1p, RPL13B - ribosomal 60s subunit protein l13b, RPS16A - ribosomal 40s subunit protein s16a, RPL37B - ribosomal 60s subunit protein l37b, SPB1 - spb1p, ALA1 - alan…
GO:0051168	nuclear export	1.46e-14	1.57e-12	4.03	4935	125	372	38	[RPS0B - ribosomal 40s subunit protein s0b, RPS3 - ribosomal 40s subunit protein s3, RPS26B - ribosomal 40s subunit protein s26b, RPL1B - ribosomal 60s subunit protein l1b, RRS1 - rrs1p, ZUO1 - zuo1p, RPS10A - ribosomal 40s subunit protein s10a, RPL40A - ubiquitin-ribosomal 60s subunit protein l40a fusion protein, RPL1A - ribosomal 60s subunit protein l1a, LTV1 - ltv1p, NUG1 - nug1p, RPS18A - rib…
GO:0000470	maturation of LSU-rRNA	7.36e-14	7.75e-12	6.23	4935	49	372	23	[NSA2 - nsa2p, RPL7B - ribosomal 60s subunit protein l7b, NHP2 - nhp2p, RPL1B - ribosomal 60s subunit protein l1b, NIP7 - nip7p, HAS1 - atp-dependent rna helicase has1, RPL7A - ribosomal 60s subunit protein l7a, RLP7 - rlp7p, NOP7 - nop7p, RPL8B - ribosomal 60s subunit protein l8b, RPL1A - ribosomal 60s subunit protein l1a, MAK11 - mak11p, RPF2 - rpf2p, SPB1 - spb1p, NOP12 - nop12p, ERB1 - erb1p,…
GO:0050658	RNA transport	1.61e-13	1.66e-11	3.48	4935	160	372	42	[RPS0B - ribosomal 40s subunit protein s0b, RPS3 - ribosomal 40s subunit protein s3, RPS26B - ribosomal 40s subunit protein s26b, RPL1B - ribosomal 60s subunit protein l1b, RRS1 - rrs1p, ZUO1 - zuo1p, RPS10A - ribosomal 40s subunit protein s10a, RPL40A - ubiquitin-ribosomal 60s subunit protein l40a fusion protein, RPL1A - ribosomal 60s subunit protein l1a, KAP123 - kap123p, LTV1 - ltv1p, NUG1 - n…
GO:0051236	establishment of RNA localization	1.61e-13	1.63e-11	3.48	4935	160	372	42	[RPS0B - ribosomal 40s subunit protein s0b, RPS3 - ribosomal 40s subunit protein s3, RPS26B - ribosomal 40s subunit protein s26b, RPL1B - ribosomal 60s subunit protein l1b, RRS1 - rrs1p, ZUO1 - zuo1p, RPS10A - ribosomal 40s subunit protein s10a, RPL40A - ubiquitin-ribosomal 60s subunit protein l40a fusion protein, RPL1A - ribosomal 60s subunit protein l1a, KAP123 - kap123p, LTV1 - ltv1p, NUG1 - n…
GO:0006913	nucleocytoplasmic transport	1.68e-13	1.67e-11	3.42	4935	167	372	43	[RPS0B - ribosomal 40s subunit protein s0b, RPS3 - ribosomal 40s subunit protein s3, RPS26B - ribosomal 40s subunit protein s26b, NPA3 - npa3p, RPL1B - ribosomal 60s subunit protein l1b, RRS1 - rrs1p, ZUO1 - zuo1p, RPS10A - ribosomal 40s subunit protein s10a, RPL40A - ubiquitin-ribosomal 60s subunit protein l40a fusion protein, RPL1A - ribosomal 60s subunit protein l1a, KAP123 - kap123p, LTV1 - l…
GO:0051169	nuclear transport	1.68e-13	1.63e-11	3.42	4935	167	372	43	[RPS0B - ribosomal 40s subunit protein s0b, RPS3 - ribosomal 40s subunit protein s3, RPS26B - ribosomal 40s subunit protein s26b, NPA3 - npa3p, RPL1B - ribosomal 60s subunit protein l1b, RRS1 - rrs1p, ZUO1 - zuo1p, RPS10A - ribosomal 40s subunit protein s10a, RPL40A - ubiquitin-ribosomal 60s subunit protein l40a fusion protein, RPL1A - ribosomal 60s subunit protein l1a, KAP123 - kap123p, LTV1 - l…
GO:0050657	nucleic acid transport	2.55e-13	2.44e-11	3.44	4935	162	372	42	[RPS0B - ribosomal 40s subunit protein s0b, RPS3 - ribosomal 40s subunit protein s3, RPS26B - ribosomal 40s subunit protein s26b, RPL1B - ribosomal 60s subunit protein l1b, RRS1 - rrs1p, ZUO1 - zuo1p, RPS10A - ribosomal 40s subunit protein s10a, RPL40A - ubiquitin-ribosomal 60s subunit protein l40a fusion protein, RPL1A - ribosomal 60s subunit protein l1a, KAP123 - kap123p, LTV1 - ltv1p, NUG1 - n…
GO:0006450	regulation of translational fidelity	4.82e-12	4.52e-10	7.86	4935	27	372	16	[RPS9B - ribosomal 40s subunit protein s9b, RPS23B - ribosomal 40s subunit protein s23b, RPL31B - ribosomal 60s subunit protein l31b, RPL31A - ribosomal 60s subunit protein l31a, ZUO1 - zuo1p, CDC60 - leucine--trna ligase cdc60, ALA1 - alanine--trna ligase, SSB2 - hsp70 family atpase ssb2, RPS2 - ribosomal 40s subunit protein s2, ILS1 - isoleucine--trna ligase ils1, RPS5 - rps5p, SSB1 - hsp70 fam…
GO:0090304	nucleic acid metabolic process	7.6e-12	7.01e-10	1.64	4935	1174	372	145	[NSA2 - nsa2p, RRB1 - rrb1p, FUN12 - fun12p, RPL1B - ribosomal 60s subunit protein l1b, LHP1 - lhp1p, KRR1 - krr1p, ADK1 - adenylate kinase adk1, GRS1 - glycine--trna ligase, PWP1 - pwp1p, RPS16A - ribosomal 40s subunit protein s16a, RPL37B - ribosomal 60s subunit protein l37b, NOP56 - nop56p, NOP7 - nop7p, UTP10 - utp10p, ALA1 - alanine--trna ligase, SPB1 - spb1p, RPA43 - rpa43p, RPS21A - riboso…
GO:0000478	endonucleolytic cleavage involved in rRNA processing	3.27e-11	2.96e-09	5.12	4935	57	372	22	[RPS0B - ribosomal 40s subunit protein s0b, RPL17A - ribosomal 60s subunit protein l17a, RPL17B - rpl17bp, RPS18B - ribosomal 40s subunit protein s18b, RRS1 - rrs1p, DBP3 - rna-dependent atpase dbp3, RPS21B - rps21bp, KRR1 - krr1p, PNO1 - pno1p, RRP5 - rrp5p, RPL37B - ribosomal 60s subunit protein l37b, TSR1 - tsr1p, UTP10 - utp10p, RPS0A - ribosomal 40s subunit protein s0a, BRX1 - brx1p, RPS18A …
GO:0000479	endonucleolytic cleavage of tricistronic rRNA transcript (SSU-rRNA, 5.8S rRNA, LSU-rRNA)	3.27e-11	2.91e-09	5.12	4935	57	372	22	[RPS0B - ribosomal 40s subunit protein s0b, RPL17A - ribosomal 60s subunit protein l17a, RPL17B - rpl17bp, RPS18B - ribosomal 40s subunit protein s18b, RRS1 - rrs1p, DBP3 - rna-dependent atpase dbp3, RPS21B - rps21bp, KRR1 - krr1p, PNO1 - pno1p, RRP5 - rrp5p, RPL37B - ribosomal 60s subunit protein l37b, TSR1 - tsr1p, UTP10 - utp10p, RPS0A - ribosomal 40s subunit protein s0a, BRX1 - brx1p, RPS18A …
GO:0000463	maturation of LSU-rRNA from tricistronic rRNA transcript (SSU-rRNA, 5.8S rRNA, LSU-rRNA)	3.43e-11	3e-09	6.28	4935	38	372	18	[NSA2 - nsa2p, RPL7B - ribosomal 60s subunit protein l7b, NIP7 - nip7p, HAS1 - atp-dependent rna helicase has1, RPL7A - ribosomal 60s subunit protein l7a, RLP7 - rlp7p, NOP7 - nop7p, RPF2 - rpf2p, MAK11 - mak11p, NOP12 - nop12p, SPB1 - spb1p, ERB1 - erb1p, NUG1 - nug1p, DBP9 - dbp9p, RPL35A - ribosomal 60s subunit protein l35a, PRP43 - prp43p, NOP4 - nop4p, YTM1 - ytm1p]
GO:0015931	nucleobase-containing compound transport	5.09e-11	4.38e-09	2.88	4935	203	372	44	[RPS0B - ribosomal 40s subunit protein s0b, RPS3 - ribosomal 40s subunit protein s3, RPS26B - ribosomal 40s subunit protein s26b, RPL1B - ribosomal 60s subunit protein l1b, RRS1 - rrs1p, ZUO1 - zuo1p, RPL40A - ubiquitin-ribosomal 60s subunit protein l40a fusion protein, RPS10A - ribosomal 40s subunit protein s10a, RPL1A - ribosomal 60s subunit protein l1a, FCY2 - fcy2p, KAP123 - kap123p, NUG1 - n…
GO:0000469	cleavage involved in rRNA processing	2.99e-10	2.53e-08	4.15	4935	80	372	25	[RPS0B - ribosomal 40s subunit protein s0b, RPL17A - ribosomal 60s subunit protein l17a, RPL17B - rpl17bp, RRS1 - rrs1p, DBP3 - rna-dependent atpase dbp3, KRR1 - krr1p, PNO1 - pno1p, RPL37B - ribosomal 60s subunit protein l37b, UTP10 - utp10p, BRX1 - brx1p, RPS18A - ribosomal 40s subunit protein s18a, RPS21A - ribosomal 40s subunit protein s21a, SAS10 - sas10p, ENP1 - enp1p, NHP2 - nhp2p, RPS18B …
GO:0006418	tRNA aminoacylation for protein translation	4.97e-10	4.14e-08	6.24	4935	34	372	16	[ARC1 - arc1p, HTS1 - histidine--trna ligase, SES1 - serine--trna ligase ses1, GRS1 - glycine--trna ligase, THS1 - threonine--trna ligase ths1, CDC60 - leucine--trna ligase cdc60, GLN4 - glutamine--trna ligase, TYS1 - tyrosine--trna ligase tys1, ALA1 - alanine--trna ligase, GUS1 - glutamate--trna ligase gus1, ILS1 - isoleucine--trna ligase ils1, KRS1 - lysine--trna ligase krs1, MES1 - methionine-…
GO:0097064	ncRNA export from nucleus	8.54e-10	7e-08	6.06	4935	35	372	16	[RPS0B - ribosomal 40s subunit protein s0b, RPS3 - ribosomal 40s subunit protein s3, RPS19A - ribosomal 40s subunit protein s19a, RPS26B - ribosomal 40s subunit protein s26b, RPS18B - ribosomal 40s subunit protein s18b, RPS10A - ribosomal 40s subunit protein s10a, UTP8 - utp8p, RPS10B - ribosomal 40s subunit protein s10b, RPS15 - ribosomal 40s subunit protein s15, RPS0A - ribosomal 40s subunit pr…
GO:0006414	translational elongation	2.28e-09	1.84e-07	6.63	4935	28	372	14	[RPP1B - ribosomal protein p1b, RPP1A - ribosomal protein p1a, STM1 - stm1p, ZUO1 - zuo1p, EFT2 - eft2p, RPP2B - ribosomal protein p2b, SSB2 - hsp70 family atpase ssb2, ASC1 - asc1p, RPP2A - ribosomal protein p2a, TEF4 - tef4p, EFB1 - efb1p, YEF3 - yef3p, EFT1 - eft1p, SSB1 - hsp70 family atpase ssb1]
GO:0043038	amino acid activation	2.35e-09	1.87e-07	5.74	4935	37	372	16	[ARC1 - arc1p, HTS1 - histidine--trna ligase, SES1 - serine--trna ligase ses1, GRS1 - glycine--trna ligase, THS1 - threonine--trna ligase ths1, CDC60 - leucine--trna ligase cdc60, GLN4 - glutamine--trna ligase, ALA1 - alanine--trna ligase, TYS1 - tyrosine--trna ligase tys1, GUS1 - glutamate--trna ligase gus1, ILS1 - isoleucine--trna ligase ils1, KRS1 - lysine--trna ligase krs1, MES1 - methionine-…
GO:0043039	tRNA aminoacylation	2.35e-09	1.84e-07	5.74	4935	37	372	16	[ARC1 - arc1p, HTS1 - histidine--trna ligase, SES1 - serine--trna ligase ses1, GRS1 - glycine--trna ligase, THS1 - threonine--trna ligase ths1, CDC60 - leucine--trna ligase cdc60, GLN4 - glutamine--trna ligase, TYS1 - tyrosine--trna ligase tys1, ALA1 - alanine--trna ligase, GUS1 - glutamate--trna ligase gus1, ILS1 - isoleucine--trna ligase ils1, KRS1 - lysine--trna ligase krs1, MES1 - methionine-…
GO:0034404	nucleobase-containing small molecule biosynthetic process	4.21e-09	3.24e-07	4.29	4935	65	372	21	[TDH2 - tdh2p, HAM1 - ham1p, HPT1 - hypoxanthine phosphoribosyltransferase, TPI1 - triose-phosphate isomerase tpi1, URA5 - orotate phosphoribosyltransferase ura5, FBA1 - fructose-bisphosphate aldolase fba1, URA2 - ura2p, ADO1 - ado1p, IMD4 - imp dehydrogenase imd4, TDH3 - glyceraldehyde-3-phosphate dehydrogenase (phosphorylating) tdh3, PGI1 - glucose-6-phosphate isomerase, PGK1 - phosphoglycerate…
GO:0044283	small molecule biosynthetic process	2.24e-08	1.7e-06	2.14	4935	341	372	55	[TDH2 - tdh2p, FBA1 - fructose-bisphosphate aldolase fba1, URA5 - orotate phosphoribosyltransferase ura5, ARO2 - bifunctional chorismate synthase/riboflavin reductase [nad(p)h] aro2, ERG6 - sterol 24-c-methyltransferase, PDC1 - indolepyruvate decarboxylase 1, LYS20 - homocitrate synthase lys20, ERG4 - delta(24(24(1)))-sterol reductase, ILV5 - ketol-acid reductoisomerase, ASN2 - asparagine synthas…
GO:0042274	ribosomal small subunit biogenesis	7.59e-08	5.68e-06	5.75	4935	30	372	13	[RPS19A - ribosomal 40s subunit protein s19a, IMP4 - imp4p, KRR1 - krr1p, HAS1 - atp-dependent rna helicase has1, NOP6 - nop6p, RPS7B - ribosomal 40s subunit protein s7b, LTV1 - ltv1p, KRE33 - kre33p, UTP21 - utp21p, ENP2 - enp2p, RPS19B - ribosomal 40s subunit protein s19b, RPS7A - ribosomal 40s subunit protein s7a, NEW1 - new1p]
GO:0009119	ribonucleoside metabolic process	8.08e-08	5.96e-06	5.31	4935	35	372	14	[URA5 - orotate phosphoribosyltransferase ura5, HPT1 - hypoxanthine phosphoribosyltransferase, URA2 - ura2p, IMD4 - imp dehydrogenase imd4, ADO1 - ado1p, SAM4 - sam4p, URA7 - ctp synthase ura7, GUA1 - gmp synthase (glutamine-hydrolyzing), URA4 - dihydroorotase, GUK1 - guanylate kinase, URA1 - dihydroorotate dehydrogenase, APT1 - adenine phosphoribosyltransferase apt1, IMD3 - imp dehydrogenase imd…
GO:0043436	oxoacid metabolic process	8.23e-08	5.98e-06	1.98	4935	401	372	60	[TDH2 - tdh2p, FBA1 - fructose-bisphosphate aldolase fba1, ARO2 - bifunctional chorismate synthase/riboflavin reductase [nad(p)h] aro2, PDC1 - indolepyruvate decarboxylase 1, GRS1 - glycine--trna ligase, LYS20 - homocitrate synthase lys20, FAA4 - long-chain fatty acid-coa ligase faa4, ALA1 - alanine--trna ligase, ILV5 - ketol-acid reductoisomerase, ASN2 - asparagine synthase (glutamine-hydrolyzin…
GO:0006082	organic acid metabolic process	9.89e-08	7.1e-06	1.98	4935	403	372	60	[TDH2 - tdh2p, FBA1 - fructose-bisphosphate aldolase fba1, ARO2 - bifunctional chorismate synthase/riboflavin reductase [nad(p)h] aro2, PDC1 - indolepyruvate decarboxylase 1, GRS1 - glycine--trna ligase, LYS20 - homocitrate synthase lys20, FAA4 - long-chain fatty acid-coa ligase faa4, ALA1 - alanine--trna ligase, ILV5 - ketol-acid reductoisomerase, ASN2 - asparagine synthase (glutamine-hydrolyzin…
GO:0009161	ribonucleoside monophosphate metabolic process	2.59e-07	1.83e-05	3.25	4935	94	372	23	[TDH2 - tdh2p, HPT1 - hypoxanthine phosphoribosyltransferase, TPI1 - triose-phosphate isomerase tpi1, URA5 - orotate phosphoribosyltransferase ura5, FBA1 - fructose-bisphosphate aldolase fba1, URA2 - ura2p, IMD4 - imp dehydrogenase imd4, ADO1 - ado1p, TDH3 - glyceraldehyde-3-phosphate dehydrogenase (phosphorylating) tdh3, ADK1 - adenylate kinase adk1, PDC1 - indolepyruvate decarboxylase 1, PGI1 -…
GO:0071426	ribonucleoprotein complex export from nucleus	2.63e-07	1.83e-05	4.33	4935	49	372	16	[RPS3 - ribosomal 40s subunit protein s3, RPL40B - ubiquitin-ribosomal 60s subunit protein l40b fusion protein, RPL1B - ribosomal 60s subunit protein l1b, ZUO1 - zuo1p, NOG1 - nog1p, RRS1 - rrs1p, RPL40A - ubiquitin-ribosomal 60s subunit protein l40a fusion protein, SDA1 - sda1p, RPL1A - ribosomal 60s subunit protein l1a, SSB2 - hsp70 family atpase ssb2, NUG1 - nug1p, LTV1 - ltv1p, ARB1 - atp-bin…
GO:0071428	rRNA-containing ribonucleoprotein complex export from nucleus	2.63e-07	1.81e-05	4.33	4935	49	372	16	[RPS3 - ribosomal 40s subunit protein s3, RPL40B - ubiquitin-ribosomal 60s subunit protein l40b fusion protein, RPL1B - ribosomal 60s subunit protein l1b, ZUO1 - zuo1p, NOG1 - nog1p, RRS1 - rrs1p, RPL40A - ubiquitin-ribosomal 60s subunit protein l40a fusion protein, SDA1 - sda1p, RPL1A - ribosomal 60s subunit protein l1a, SSB2 - hsp70 family atpase ssb2, NUG1 - nug1p, LTV1 - ltv1p, ARB1 - atp-bin…
GO:0000054	ribosomal subunit export from nucleus	2.63e-07	1.79e-05	4.33	4935	49	372	16	[RPS3 - ribosomal 40s subunit protein s3, RPL40B - ubiquitin-ribosomal 60s subunit protein l40b fusion protein, RPL1B - ribosomal 60s subunit protein l1b, ZUO1 - zuo1p, NOG1 - nog1p, RRS1 - rrs1p, RPL40A - ubiquitin-ribosomal 60s subunit protein l40a fusion protein, SDA1 - sda1p, RPL1A - ribosomal 60s subunit protein l1a, SSB2 - hsp70 family atpase ssb2, NUG1 - nug1p, LTV1 - ltv1p, ARB1 - atp-bin…
GO:0019752	carboxylic acid metabolic process	2.66e-07	1.78e-05	1.96	4935	385	372	57	[TDH2 - tdh2p, FBA1 - fructose-bisphosphate aldolase fba1, ARO2 - bifunctional chorismate synthase/riboflavin reductase [nad(p)h] aro2, PDC1 - indolepyruvate decarboxylase 1, GRS1 - glycine--trna ligase, LYS20 - homocitrate synthase lys20, FAA4 - long-chain fatty acid-coa ligase faa4, ALA1 - alanine--trna ligase, ILV5 - ketol-acid reductoisomerase, ASN2 - asparagine synthase (glutamine-hydrolyzin…
GO:0046390	ribose phosphate biosynthetic process	3.11e-07	2.06e-05	3.12	4935	102	372	24	[TDH2 - tdh2p, TPI1 - triose-phosphate isomerase tpi1, FBA1 - fructose-bisphosphate aldolase fba1, URA5 - orotate phosphoribosyltransferase ura5, URA2 - ura2p, HPT1 - hypoxanthine phosphoribosyltransferase, ADO1 - ado1p, IMD4 - imp dehydrogenase imd4, TDH3 - glyceraldehyde-3-phosphate dehydrogenase (phosphorylating) tdh3, ADK1 - adenylate kinase adk1, PGI1 - glucose-6-phosphate isomerase, PGK1 - …
GO:0000447	endonucleolytic cleavage in ITS1 to separate SSU-rRNA from 5.8S rRNA and LSU-rRNA from tricistronic rRNA transcript (SSU-rRNA, 5.8S rRNA, LSU-rRNA)	3.31e-07	2.16e-05	4.52	4935	44	372	15	[RPS0B - ribosomal 40s subunit protein s0b, RPS18B - ribosomal 40s subunit protein s18b, RRS1 - rrs1p, RPS21B - rps21bp, KRR1 - krr1p, PNO1 - pno1p, RRP5 - rrp5p, UTP10 - utp10p, RPS0A - ribosomal 40s subunit protein s0a, RPS18A - ribosomal 40s subunit protein s18a, RPS21A - ribosomal 40s subunit protein s21a, SAS10 - sas10p, ENP1 - enp1p, MRD1 - mrd1p, NOP58 - nop58p]
GO:0033750	ribosome localization	3.6e-07	2.33e-05	4.25	4935	50	372	16	[RPS3 - ribosomal 40s subunit protein s3, RPL40B - ubiquitin-ribosomal 60s subunit protein l40b fusion protein, RPL1B - ribosomal 60s subunit protein l1b, ZUO1 - zuo1p, NOG1 - nog1p, RRS1 - rrs1p, RPL40A - ubiquitin-ribosomal 60s subunit protein l40a fusion protein, SDA1 - sda1p, RPL1A - ribosomal 60s subunit protein l1a, SSB2 - hsp70 family atpase ssb2, NUG1 - nug1p, LTV1 - ltv1p, ARB1 - atp-bin…
GO:0009260	ribonucleotide biosynthetic process	3.91e-07	2.49e-05	3.18	4935	96	372	23	[TDH2 - tdh2p, HPT1 - hypoxanthine phosphoribosyltransferase, TPI1 - triose-phosphate isomerase tpi1, URA5 - orotate phosphoribosyltransferase ura5, FBA1 - fructose-bisphosphate aldolase fba1, URA2 - ura2p, ADO1 - ado1p, IMD4 - imp dehydrogenase imd4, TDH3 - glyceraldehyde-3-phosphate dehydrogenase (phosphorylating) tdh3, ADK1 - adenylate kinase adk1, PGK1 - phosphoglycerate kinase, PGI1 - glucos…
GO:0042455	ribonucleoside biosynthetic process	4.52e-07	2.85e-05	5.49	4935	29	372	12	[GUA1 - gmp synthase (glutamine-hydrolyzing), URA7 - ctp synthase ura7, URA4 - dihydroorotase, GUK1 - guanylate kinase, URA1 - dihydroorotate dehydrogenase, HPT1 - hypoxanthine phosphoribosyltransferase, URA2 - ura2p, URA5 - orotate phosphoribosyltransferase ura5, ADO1 - ado1p, IMD4 - imp dehydrogenase imd4, APT1 - adenine phosphoribosyltransferase apt1, IMD3 - imp dehydrogenase imd3]
GO:0019693	ribose phosphate metabolic process	4.69e-07	2.92e-05	2.71	4935	142	372	29	[TKL1 - transketolase tkl1, TDH2 - tdh2p, URA5 - orotate phosphoribosyltransferase ura5, FBA1 - fructose-bisphosphate aldolase fba1, IMD4 - imp dehydrogenase imd4, ADK1 - adenylate kinase adk1, PDC1 - indolepyruvate decarboxylase 1, PGK1 - phosphoglycerate kinase, PGI1 - glucose-6-phosphate isomerase, FAA4 - long-chain fatty acid-coa ligase faa4, URA4 - dihydroorotase, GUK1 - guanylate kinase, SH…
GO:0009156	ribonucleoside monophosphate biosynthetic process	4.77e-07	2.93e-05	3.36	4935	83	372	21	[TDH2 - tdh2p, TPI1 - triose-phosphate isomerase tpi1, HPT1 - hypoxanthine phosphoribosyltransferase, URA5 - orotate phosphoribosyltransferase ura5, FBA1 - fructose-bisphosphate aldolase fba1, URA2 - ura2p, ADO1 - ado1p, IMD4 - imp dehydrogenase imd4, TDH3 - glyceraldehyde-3-phosphate dehydrogenase (phosphorylating) tdh3, ADK1 - adenylate kinase adk1, PGK1 - phosphoglycerate kinase, PGI1 - glucos…
GO:0009163	nucleoside biosynthetic process	7.03e-07	4.27e-05	5.31	4935	30	372	12	[URA7 - ctp synthase ura7, GUA1 - gmp synthase (glutamine-hydrolyzing), GUK1 - guanylate kinase, URA4 - dihydroorotase, URA1 - dihydroorotate dehydrogenase, URA2 - ura2p, HPT1 - hypoxanthine phosphoribosyltransferase, URA5 - orotate phosphoribosyltransferase ura5, ADO1 - ado1p, IMD4 - imp dehydrogenase imd4, APT1 - adenine phosphoribosyltransferase apt1, IMD3 - imp dehydrogenase imd3]
GO:0090502	RNA phosphodiester bond hydrolysis, endonucleolytic	7.29e-07	4.37e-05	3.17	4935	92	372	22	[RPS0B - ribosomal 40s subunit protein s0b, RPL17A - ribosomal 60s subunit protein l17a, RPL17B - rpl17bp, RPS18B - ribosomal 40s subunit protein s18b, RRS1 - rrs1p, DBP3 - rna-dependent atpase dbp3, RPS21B - rps21bp, KRR1 - krr1p, PNO1 - pno1p, RRP5 - rrp5p, RPL37B - ribosomal 60s subunit protein l37b, TSR1 - tsr1p, UTP10 - utp10p, RPS0A - ribosomal 40s subunit protein s0a, BRX1 - brx1p, RPS18A …
GO:0009259	ribonucleotide metabolic process	7.95e-07	4.72e-05	2.83	4935	122	372	26	[TDH2 - tdh2p, URA5 - orotate phosphoribosyltransferase ura5, FBA1 - fructose-bisphosphate aldolase fba1, IMD4 - imp dehydrogenase imd4, ADK1 - adenylate kinase adk1, PDC1 - indolepyruvate decarboxylase 1, PGK1 - phosphoglycerate kinase, PGI1 - glucose-6-phosphate isomerase, FAA4 - long-chain fatty acid-coa ligase faa4, GUK1 - guanylate kinase, URA4 - dihydroorotase, CDC19 - pyruvate kinase cdc19…
GO:0009124	nucleoside monophosphate biosynthetic process	9.04e-07	5.3e-05	3.24	4935	86	372	21	[TDH2 - tdh2p, HPT1 - hypoxanthine phosphoribosyltransferase, TPI1 - triose-phosphate isomerase tpi1, FBA1 - fructose-bisphosphate aldolase fba1, URA5 - orotate phosphoribosyltransferase ura5, URA2 - ura2p, ADO1 - ado1p, IMD4 - imp dehydrogenase imd4, TDH3 - glyceraldehyde-3-phosphate dehydrogenase (phosphorylating) tdh3, ADK1 - adenylate kinase adk1, PGI1 - glucose-6-phosphate isomerase, PGK1 - …
GO:0044281	small molecule metabolic process	1.23e-06	7.14e-05	1.63	4935	682	372	84	[TDH2 - tdh2p, TKL1 - transketolase tkl1, URA5 - orotate phosphoribosyltransferase ura5, FBA1 - fructose-bisphosphate aldolase fba1, ARO2 - bifunctional chorismate synthase/riboflavin reductase [nad(p)h] aro2, ADK1 - adenylate kinase adk1, ERG6 - sterol 24-c-methyltransferase, GRS1 - glycine--trna ligase, PSA1 - mannose-1-phosphate guanylyltransferase, PDC1 - indolepyruvate decarboxylase 1, LYS20…
GO:0009123	nucleoside monophosphate metabolic process	1.24e-06	7.1e-05	2.99	4935	102	372	23	[TDH2 - tdh2p, TPI1 - triose-phosphate isomerase tpi1, FBA1 - fructose-bisphosphate aldolase fba1, URA5 - orotate phosphoribosyltransferase ura5, URA2 - ura2p, HPT1 - hypoxanthine phosphoribosyltransferase, ADO1 - ado1p, IMD4 - imp dehydrogenase imd4, TDH3 - glyceraldehyde-3-phosphate dehydrogenase (phosphorylating) tdh3, ADK1 - adenylate kinase adk1, PDC1 - indolepyruvate decarboxylase 1, PGI1 -…
GO:0001732	formation of cytoplasmic translation initiation complex	1.29e-06	7.31e-05	9.29	4935	10	372	7	[RPG1 - rpg1p, TIF5 - tif5p, FUN12 - fun12p, TIF34 - tif34p, PRT1 - prt1p, TIF11 - tif11p, SUI3 - sui3p]
GO:0006520	cellular amino acid metabolic process	1.32e-06	7.4e-05	2.21	4935	234	372	39	[SES1 - serine--trna ligase ses1, ARO2 - bifunctional chorismate synthase/riboflavin reductase [nad(p)h] aro2, PDC1 - indolepyruvate decarboxylase 1, GRS1 - glycine--trna ligase, THS1 - threonine--trna ligase ths1, LYS20 - homocitrate synthase lys20, TYS1 - tyrosine--trna ligase tys1, ILV5 - ketol-acid reductoisomerase, ASN1 - asparagine synthase (glutamine-hydrolyzing) 1, ALA1 - alanine--trna li…
GO:0006611	protein export from nucleus	1.53e-06	8.51e-05	3.86	4935	55	372	16	[RPS3 - ribosomal 40s subunit protein s3, RPL40B - ubiquitin-ribosomal 60s subunit protein l40b fusion protein, RPL1B - ribosomal 60s subunit protein l1b, ZUO1 - zuo1p, NOG1 - nog1p, RRS1 - rrs1p, RPL40A - ubiquitin-ribosomal 60s subunit protein l40a fusion protein, SDA1 - sda1p, RPL1A - ribosomal 60s subunit protein l1a, SSB2 - hsp70 family atpase ssb2, NUG1 - nug1p, LTV1 - ltv1p, ARB1 - atp-bin…
GO:0009987	cellular process	1.58e-06	8.66e-05	1.09	4935	4262	372	349	[NSA2 - nsa2p, RRB1 - rrb1p, RPS26B - ribosomal 40s subunit protein s26b, RPL1B - ribosomal 60s subunit protein l1b, LHP1 - lhp1p, ARO2 - bifunctional chorismate synthase/riboflavin reductase [nad(p)h] aro2, KRR1 - krr1p, RPL9A - ribosomal 60s subunit protein l9a, RPL23B - ribosomal 60s subunit protein l23b, PRT1 - prt1p, PSA1 - mannose-1-phosphate guanylyltransferase, RPL13B - ribosomal 60s subu…
GO:0000461	endonucleolytic cleavage to generate mature 3'-end of SSU-rRNA from (SSU-rRNA, 5.8S rRNA, LSU-rRNA)	2.37e-06	0.000129	13.27	4935	5	372	5	[RPS0B - ribosomal 40s subunit protein s0b, TSR1 - tsr1p, RPS0A - ribosomal 40s subunit protein s0a, RPS21B - rps21bp, RPS21A - ribosomal 40s subunit protein s21a]
GO:0009126	purine nucleoside monophosphate metabolic process	3.14e-06	0.000169	3.23	4935	78	372	19	[TDH2 - tdh2p, HPT1 - hypoxanthine phosphoribosyltransferase, TPI1 - triose-phosphate isomerase tpi1, FBA1 - fructose-bisphosphate aldolase fba1, ADO1 - ado1p, IMD4 - imp dehydrogenase imd4, TDH3 - glyceraldehyde-3-phosphate dehydrogenase (phosphorylating) tdh3, ADK1 - adenylate kinase adk1, PDC1 - indolepyruvate decarboxylase 1, PGI1 - glucose-6-phosphate isomerase, PGK1 - phosphoglycerate kinas…
GO:0009167	purine ribonucleoside monophosphate metabolic process	3.14e-06	0.000167	3.23	4935	78	372	19	[TDH2 - tdh2p, TPI1 - triose-phosphate isomerase tpi1, HPT1 - hypoxanthine phosphoribosyltransferase, FBA1 - fructose-bisphosphate aldolase fba1, ADO1 - ado1p, IMD4 - imp dehydrogenase imd4, TDH3 - glyceraldehyde-3-phosphate dehydrogenase (phosphorylating) tdh3, ADK1 - adenylate kinase adk1, PDC1 - indolepyruvate decarboxylase 1, PGK1 - phosphoglycerate kinase, PGI1 - glucose-6-phosphate isomeras…
GO:1901659	glycosyl compound biosynthetic process	3.38e-06	0.000178	4.68	4935	34	372	12	[GUA1 - gmp synthase (glutamine-hydrolyzing), URA7 - ctp synthase ura7, GUK1 - guanylate kinase, URA4 - dihydroorotase, URA1 - dihydroorotate dehydrogenase, URA2 - ura2p, HPT1 - hypoxanthine phosphoribosyltransferase, URA5 - orotate phosphoribosyltransferase ura5, ADO1 - ado1p, IMD4 - imp dehydrogenase imd4, APT1 - adenine phosphoribosyltransferase apt1, IMD3 - imp dehydrogenase imd3]
GO:0009116	nucleoside metabolic process	3.87e-06	0.000202	4.04	4935	46	372	14	[URA5 - orotate phosphoribosyltransferase ura5, HPT1 - hypoxanthine phosphoribosyltransferase, URA2 - ura2p, IMD4 - imp dehydrogenase imd4, ADO1 - ado1p, SAM4 - sam4p, GUA1 - gmp synthase (glutamine-hydrolyzing), URA7 - ctp synthase ura7, URA4 - dihydroorotase, GUK1 - guanylate kinase, URA1 - dihydroorotate dehydrogenase, APT1 - adenine phosphoribosyltransferase apt1, IMD3 - imp dehydrogenase imd…
GO:0046128	purine ribonucleoside metabolic process	5.68e-06	0.000293	5.97	4935	20	372	9	[GUA1 - gmp synthase (glutamine-hydrolyzing), GUK1 - guanylate kinase, HPT1 - hypoxanthine phosphoribosyltransferase, IMD4 - imp dehydrogenase imd4, ADO1 - ado1p, APT1 - adenine phosphoribosyltransferase apt1, IMD3 - imp dehydrogenase imd3, SAM4 - sam4p, SAH1 - adenosylhomocysteinase]
GO:0009127	purine nucleoside monophosphate biosynthetic process	5.77e-06	0.000295	3.37	4935	67	372	17	[TDH2 - tdh2p, TPI1 - triose-phosphate isomerase tpi1, HPT1 - hypoxanthine phosphoribosyltransferase, FBA1 - fructose-bisphosphate aldolase fba1, ADO1 - ado1p, IMD4 - imp dehydrogenase imd4, TDH3 - glyceraldehyde-3-phosphate dehydrogenase (phosphorylating) tdh3, ADK1 - adenylate kinase adk1, PGI1 - glucose-6-phosphate isomerase, PGK1 - phosphoglycerate kinase, GUA1 - gmp synthase (glutamine-hydro…
GO:0009168	purine ribonucleoside monophosphate biosynthetic process	5.77e-06	0.000292	3.37	4935	67	372	17	[TDH2 - tdh2p, HPT1 - hypoxanthine phosphoribosyltransferase, TPI1 - triose-phosphate isomerase tpi1, FBA1 - fructose-bisphosphate aldolase fba1, ADO1 - ado1p, IMD4 - imp dehydrogenase imd4, TDH3 - glyceraldehyde-3-phosphate dehydrogenase (phosphorylating) tdh3, ADK1 - adenylate kinase adk1, PGI1 - glucose-6-phosphate isomerase, PGK1 - phosphoglycerate kinase, GUA1 - gmp synthase (glutamine-hydro…
GO:0034622	cellular protein-containing complex assembly	8.69e-06	0.000436	1.7	4935	500	372	64	[RPS0B - ribosomal 40s subunit protein s0b, RPL24A - ribosomal 60s subunit protein l24a, FUN12 - fun12p, RTN1 - rtn1p, RPS26B - ribosomal 40s subunit protein s26b, RPL40A - ubiquitin-ribosomal 60s subunit protein l40a fusion protein, TIF11 - tif11p, PRT1 - prt1p, PMA1 - h(+)-exporting p2-type atpase pma1, BRX1 - brx1p, RPS19B - ribosomal 40s subunit protein s19b, RPL11A - ribosomal 60s subunit pr…
GO:0042278	purine nucleoside metabolic process	9.29e-06	0.000461	5.69	4935	21	372	9	[GUA1 - gmp synthase (glutamine-hydrolyzing), GUK1 - guanylate kinase, HPT1 - hypoxanthine phosphoribosyltransferase, ADO1 - ado1p, IMD4 - imp dehydrogenase imd4, APT1 - adenine phosphoribosyltransferase apt1, IMD3 - imp dehydrogenase imd3, SAM4 - sam4p, SAH1 - adenosylhomocysteinase]
GO:1901657	glycosyl compound metabolic process	1.14e-05	0.000562	3.71	4935	50	372	14	[URA5 - orotate phosphoribosyltransferase ura5, URA2 - ura2p, HPT1 - hypoxanthine phosphoribosyltransferase, ADO1 - ado1p, IMD4 - imp dehydrogenase imd4, SAM4 - sam4p, URA7 - ctp synthase ura7, GUA1 - gmp synthase (glutamine-hydrolyzing), GUK1 - guanylate kinase, URA4 - dihydroorotase, URA1 - dihydroorotate dehydrogenase, APT1 - adenine phosphoribosyltransferase apt1, IMD3 - imp dehydrogenase imd…
GO:0009185	ribonucleoside diphosphate metabolic process	1.17e-05	0.00057	4.56	4935	32	372	11	[TDH2 - tdh2p, GUK1 - guanylate kinase, TPI1 - triose-phosphate isomerase tpi1, FBA1 - fructose-bisphosphate aldolase fba1, TDH3 - glyceraldehyde-3-phosphate dehydrogenase (phosphorylating) tdh3, CDC19 - pyruvate kinase cdc19, GPM1 - phosphoglycerate mutase gpm1, ADK1 - adenylate kinase adk1, PDC1 - indolepyruvate decarboxylase 1, PGI1 - glucose-6-phosphate isomerase, PGK1 - phosphoglycerate kina…
GO:0009179	purine ribonucleoside diphosphate metabolic process	1.17e-05	0.000565	4.56	4935	32	372	11	[TDH2 - tdh2p, GUK1 - guanylate kinase, TPI1 - triose-phosphate isomerase tpi1, FBA1 - fructose-bisphosphate aldolase fba1, TDH3 - glyceraldehyde-3-phosphate dehydrogenase (phosphorylating) tdh3, CDC19 - pyruvate kinase cdc19, GPM1 - phosphoglycerate mutase gpm1, ADK1 - adenylate kinase adk1, PDC1 - indolepyruvate decarboxylase 1, PGK1 - phosphoglycerate kinase, PGI1 - glucose-6-phosphate isomera…
GO:0009135	purine nucleoside diphosphate metabolic process	1.17e-05	0.00056	4.56	4935	32	372	11	[TDH2 - tdh2p, GUK1 - guanylate kinase, TPI1 - triose-phosphate isomerase tpi1, FBA1 - fructose-bisphosphate aldolase fba1, TDH3 - glyceraldehyde-3-phosphate dehydrogenase (phosphorylating) tdh3, CDC19 - pyruvate kinase cdc19, GPM1 - phosphoglycerate mutase gpm1, ADK1 - adenylate kinase adk1, PDC1 - indolepyruvate decarboxylase 1, PGI1 - glucose-6-phosphate isomerase, PGK1 - phosphoglycerate kina…
GO:0016053	organic acid biosynthetic process	1.4e-05	0.000662	2.14	4935	211	372	34	[TDH2 - tdh2p, FBA1 - fructose-bisphosphate aldolase fba1, ARO2 - bifunctional chorismate synthase/riboflavin reductase [nad(p)h] aro2, PGI1 - glucose-6-phosphate isomerase, LYS20 - homocitrate synthase lys20, PGK1 - phosphoglycerate kinase, ASN1 - asparagine synthase (glutamine-hydrolyzing) 1, ILV5 - ketol-acid reductoisomerase, HIS1 - atp phosphoribosyltransferase, ASN2 - asparagine synthase (g…
GO:0046394	carboxylic acid biosynthetic process	1.4e-05	0.000656	2.14	4935	211	372	34	[TDH2 - tdh2p, FBA1 - fructose-bisphosphate aldolase fba1, ARO2 - bifunctional chorismate synthase/riboflavin reductase [nad(p)h] aro2, PGI1 - glucose-6-phosphate isomerase, LYS20 - homocitrate synthase lys20, PGK1 - phosphoglycerate kinase, ASN1 - asparagine synthase (glutamine-hydrolyzing) 1, ILV5 - ketol-acid reductoisomerase, HIS1 - atp phosphoribosyltransferase, ASN2 - asparagine synthase (g…
GO:0090501	RNA phosphodiester bond hydrolysis	1.54e-05	0.000717	2.43	4935	142	372	26	[RPL17A - ribosomal 60s subunit protein l17a, RPS0B - ribosomal 40s subunit protein s0b, RPL17B - rpl17bp, RRS1 - rrs1p, DBP3 - rna-dependent atpase dbp3, KRR1 - krr1p, PNO1 - pno1p, RPL37B - ribosomal 60s subunit protein l37b, UTP10 - utp10p, BRX1 - brx1p, RPS18A - ribosomal 40s subunit protein s18a, RPS21A - ribosomal 40s subunit protein s21a, SAS10 - sas10p, ENP1 - enp1p, NHP2 - nhp2p, RPS18B …
GO:0072330	monocarboxylic acid biosynthetic process	1.88e-05	0.000866	2.98	4935	80	372	18	[TDH2 - tdh2p, FEN1 - fatty acid elongase fen1, SUR4 - fatty acid elongase sur4, FBA1 - fructose-bisphosphate aldolase fba1, TPI1 - triose-phosphate isomerase tpi1, TDH3 - glyceraldehyde-3-phosphate dehydrogenase (phosphorylating) tdh3, PGK1 - phosphoglycerate kinase, PGI1 - glucose-6-phosphate isomerase, ASN1 - asparagine synthase (glutamine-hydrolyzing) 1, ASN2 - asparagine synthase (glutamine-…
GO:0065003	protein-containing complex assembly	2.16e-05	0.000988	1.65	4935	514	372	64	[RPS0B - ribosomal 40s subunit protein s0b, RPL24A - ribosomal 60s subunit protein l24a, FUN12 - fun12p, RTN1 - rtn1p, RPS26B - ribosomal 40s subunit protein s26b, RPL40A - ubiquitin-ribosomal 60s subunit protein l40a fusion protein, TIF11 - tif11p, PRT1 - prt1p, PMA1 - h(+)-exporting p2-type atpase pma1, BRX1 - brx1p, RPS19B - ribosomal 40s subunit protein s19b, RPL11A - ribosomal 60s subunit pr…
GO:0009152	purine ribonucleotide biosynthetic process	2.69e-05	0.00122	2.91	4935	82	372	18	[TDH2 - tdh2p, TPI1 - triose-phosphate isomerase tpi1, HPT1 - hypoxanthine phosphoribosyltransferase, FBA1 - fructose-bisphosphate aldolase fba1, ADO1 - ado1p, IMD4 - imp dehydrogenase imd4, TDH3 - glyceraldehyde-3-phosphate dehydrogenase (phosphorylating) tdh3, ADK1 - adenylate kinase adk1, PGK1 - phosphoglycerate kinase, PGI1 - glucose-6-phosphate isomerase, GUA1 - gmp synthase (glutamine-hydro…
GO:1902626	assembly of large subunit precursor of preribosome	2.85e-05	0.00128	7.96	4935	10	372	6	[RPF2 - rpf2p, RPL24A - ribosomal 60s subunit protein l24a, RLP24 - rlp24p, NIP7 - nip7p, NOG1 - nog1p, RPL24B - ribosomal 60s subunit protein l24b]
GO:0000466	maturation of 5.8S rRNA from tricistronic rRNA transcript (SSU-rRNA, 5.8S rRNA, LSU-rRNA)	3.49e-05	0.00155	5.59	4935	19	372	8	[RPF2 - rpf2p, MAK11 - mak11p, NSA2 - nsa2p, SPB1 - spb1p, ERB1 - erb1p, PRP43 - prp43p, YTM1 - ytm1p, NOP7 - nop7p]
GO:0072521	purine-containing compound metabolic process	3.71e-05	0.00164	2.41	4935	132	372	24	[TDH2 - tdh2p, TPI1 - triose-phosphate isomerase tpi1, HPT1 - hypoxanthine phosphoribosyltransferase, FBA1 - fructose-bisphosphate aldolase fba1, ADO1 - ado1p, IMD4 - imp dehydrogenase imd4, TDH3 - glyceraldehyde-3-phosphate dehydrogenase (phosphorylating) tdh3, ADK1 - adenylate kinase adk1, SAM4 - sam4p, PDC1 - indolepyruvate decarboxylase 1, PGI1 - glucose-6-phosphate isomerase, PGK1 - phosphog…
GO:0006360	transcription by RNA polymerase I	4.01e-05	0.00176	4.42	4935	30	372	10	[RPA43 - rpa43p, RPB5 - rpb5p, RPB8 - rpb8p, RPA34 - rpa34p, RPC40 - rpc40p, RPO26 - rpo26p, RPA190 - rpa190p, RPA135 - rpa135p, RPA12 - rpa12p, RPA49 - rpa49p]
GO:0009150	purine ribonucleotide metabolic process	4.09e-05	0.00177	2.58	4935	108	372	21	[TDH2 - tdh2p, TPI1 - triose-phosphate isomerase tpi1, HPT1 - hypoxanthine phosphoribosyltransferase, FBA1 - fructose-bisphosphate aldolase fba1, ADO1 - ado1p, IMD4 - imp dehydrogenase imd4, TDH3 - glyceraldehyde-3-phosphate dehydrogenase (phosphorylating) tdh3, ADK1 - adenylate kinase adk1, PDC1 - indolepyruvate decarboxylase 1, PGI1 - glucose-6-phosphate isomerase, PGK1 - phosphoglycerate kinas…
GO:0009132	nucleoside diphosphate metabolic process	4.14e-05	0.00178	4.05	4935	36	372	11	[TDH2 - tdh2p, GUK1 - guanylate kinase, TPI1 - triose-phosphate isomerase tpi1, FBA1 - fructose-bisphosphate aldolase fba1, TDH3 - glyceraldehyde-3-phosphate dehydrogenase (phosphorylating) tdh3, CDC19 - pyruvate kinase cdc19, GPM1 - phosphoglycerate mutase gpm1, ADK1 - adenylate kinase adk1, PDC1 - indolepyruvate decarboxylase 1, PGK1 - phosphoglycerate kinase, PGI1 - glucose-6-phosphate isomera…
GO:0006415	translational termination	4.95e-05	0.00211	6.19	4935	15	372	7	[SSB2 - hsp70 family atpase ssb2, TPA1 - tpa1p, YEF3 - yef3p, SSB1 - hsp70 family atpase ssb1, RPL10 - ribosomal 60s subunit protein l10, SUP45 - sup45p, NEW1 - new1p]
GO:0046031	ADP metabolic process	5.53e-05	0.00234	4.28	4935	31	372	10	[TDH2 - tdh2p, TPI1 - triose-phosphate isomerase tpi1, FBA1 - fructose-bisphosphate aldolase fba1, TDH3 - glyceraldehyde-3-phosphate dehydrogenase (phosphorylating) tdh3, CDC19 - pyruvate kinase cdc19, GPM1 - phosphoglycerate mutase gpm1, ADK1 - adenylate kinase adk1, PDC1 - indolepyruvate decarboxylase 1, PGI1 - glucose-6-phosphate isomerase, PGK1 - phosphoglycerate kinase]
GO:0072522	purine-containing compound biosynthetic process	6.37e-05	0.00267	2.65	4935	95	372	19	[TDH2 - tdh2p, HPT1 - hypoxanthine phosphoribosyltransferase, TPI1 - triose-phosphate isomerase tpi1, FBA1 - fructose-bisphosphate aldolase fba1, ADO1 - ado1p, IMD4 - imp dehydrogenase imd4, TDH3 - glyceraldehyde-3-phosphate dehydrogenase (phosphorylating) tdh3, ADK1 - adenylate kinase adk1, PGK1 - phosphoglycerate kinase, PGI1 - glucose-6-phosphate isomerase, GUA1 - gmp synthase (glutamine-hydro…
GO:0043933	protein-containing complex subunit organization	7.54e-05	0.00314	1.54	4935	622	372	72	[RPS0B - ribosomal 40s subunit protein s0b, RPL24A - ribosomal 60s subunit protein l24a, FUN12 - fun12p, RTN1 - rtn1p, RPS26B - ribosomal 40s subunit protein s26b, RPL40A - ubiquitin-ribosomal 60s subunit protein l40a fusion protein, TIF11 - tif11p, PRT1 - prt1p, LYS20 - homocitrate synthase lys20, PMA1 - h(+)-exporting p2-type atpase pma1, BRX1 - brx1p, RPS19B - ribosomal 40s subunit protein s19…
GO:0000460	maturation of 5.8S rRNA	8.21e-05	0.00339	5.05	4935	21	372	8	[RPF2 - rpf2p, MAK11 - mak11p, NSA2 - nsa2p, SPB1 - spb1p, ERB1 - erb1p, PRP43 - prp43p, YTM1 - ytm1p, NOP7 - nop7p]
GO:0000154	rRNA modification	8.21e-05	0.00336	5.05	4935	21	372	8	[SPB1 - spb1p, CBF5 - pseudouridine synthase cbf5, KRE33 - kre33p, DIM1 - dim1p, NHP2 - nhp2p, NOP1 - nop1p, RRP8 - rrp8p, NOP56 - nop56p]
GO:0006094	gluconeogenesis	8.23e-05	0.00335	5.8	4935	16	372	7	[TDH2 - tdh2p, FBA1 - fructose-bisphosphate aldolase fba1, TPI1 - triose-phosphate isomerase tpi1, TDH3 - glyceraldehyde-3-phosphate dehydrogenase (phosphorylating) tdh3, GPM1 - phosphoglycerate mutase gpm1, PGI1 - glucose-6-phosphate isomerase, PGK1 - phosphoglycerate kinase]
GO:0019319	hexose biosynthetic process	8.23e-05	0.00332	5.8	4935	16	372	7	[TDH2 - tdh2p, FBA1 - fructose-bisphosphate aldolase fba1, TPI1 - triose-phosphate isomerase tpi1, TDH3 - glyceraldehyde-3-phosphate dehydrogenase (phosphorylating) tdh3, GPM1 - phosphoglycerate mutase gpm1, PGI1 - glucose-6-phosphate isomerase, PGK1 - phosphoglycerate kinase]
GO:0042451	purine nucleoside biosynthetic process	8.23e-05	0.0033	5.8	4935	16	372	7	[GUA1 - gmp synthase (glutamine-hydrolyzing), GUK1 - guanylate kinase, HPT1 - hypoxanthine phosphoribosyltransferase, ADO1 - ado1p, IMD4 - imp dehydrogenase imd4, APT1 - adenine phosphoribosyltransferase apt1, IMD3 - imp dehydrogenase imd3]
GO:0046129	purine ribonucleoside biosynthetic process	8.23e-05	0.00327	5.8	4935	16	372	7	[GUA1 - gmp synthase (glutamine-hydrolyzing), GUK1 - guanylate kinase, HPT1 - hypoxanthine phosphoribosyltransferase, ADO1 - ado1p, IMD4 - imp dehydrogenase imd4, APT1 - adenine phosphoribosyltransferase apt1, IMD3 - imp dehydrogenase imd3]
GO:0055086	nucleobase-containing small molecule metabolic process	9.1e-05	0.00359	1.93	4935	240	372	35	[TKL1 - transketolase tkl1, TDH2 - tdh2p, HAM1 - ham1p, FBA1 - fructose-bisphosphate aldolase fba1, URA5 - orotate phosphoribosyltransferase ura5, IMD4 - imp dehydrogenase imd4, ADK1 - adenylate kinase adk1, PDC1 - indolepyruvate decarboxylase 1, PSA1 - mannose-1-phosphate guanylyltransferase, PGI1 - glucose-6-phosphate isomerase, PGK1 - phosphoglycerate kinase, FAA4 - long-chain fatty acid-coa l…
GO:0006164	purine nucleotide biosynthetic process	9.92e-05	0.00388	2.65	4935	90	372	18	[TDH2 - tdh2p, HPT1 - hypoxanthine phosphoribosyltransferase, TPI1 - triose-phosphate isomerase tpi1, FBA1 - fructose-bisphosphate aldolase fba1, ADO1 - ado1p, IMD4 - imp dehydrogenase imd4, TDH3 - glyceraldehyde-3-phosphate dehydrogenase (phosphorylating) tdh3, ADK1 - adenylate kinase adk1, PGI1 - glucose-6-phosphate isomerase, PGK1 - phosphoglycerate kinase, GUA1 - gmp synthase (glutamine-hydro…
GO:0106074	aminoacyl-tRNA metabolism involved in translational fidelity	0.00011	0.00426	8.29	4935	8	372	5	[ALA1 - alanine--trna ligase, ILS1 - isoleucine--trna ligase ils1, FRS2 - phenylalanine--trna ligase subunit alpha, CDC60 - leucine--trna ligase cdc60, VAS1 - valine--trna ligase]
GO:0046112	nucleobase biosynthetic process	0.000121	0.00465	4.82	4935	22	372	8	[URA7 - ctp synthase ura7, URA4 - dihydroorotase, URA1 - dihydroorotate dehydrogenase, URA2 - ura2p, URA5 - orotate phosphoribosyltransferase ura5, ADE5,7 - bifunctional aminoimidazole ribotide synthase/glycinamide ribotide synthase, APT1 - adenine phosphoribosyltransferase apt1, AAH1 - adenine deaminase]
GO:0046364	monosaccharide biosynthetic process	0.000131	0.00501	5.46	4935	17	372	7	[TDH2 - tdh2p, FBA1 - fructose-bisphosphate aldolase fba1, TPI1 - triose-phosphate isomerase tpi1, TDH3 - glyceraldehyde-3-phosphate dehydrogenase (phosphorylating) tdh3, GPM1 - phosphoglycerate mutase gpm1, PGI1 - glucose-6-phosphate isomerase, PGK1 - phosphoglycerate kinase]
GO:0006163	purine nucleotide metabolic process	0.000138	0.00525	2.38	4935	117	372	21	[TDH2 - tdh2p, TPI1 - triose-phosphate isomerase tpi1, HPT1 - hypoxanthine phosphoribosyltransferase, FBA1 - fructose-bisphosphate aldolase fba1, ADO1 - ado1p, IMD4 - imp dehydrogenase imd4, TDH3 - glyceraldehyde-3-phosphate dehydrogenase (phosphorylating) tdh3, ADK1 - adenylate kinase adk1, PDC1 - indolepyruvate decarboxylase 1, PGI1 - glucose-6-phosphate isomerase, PGK1 - phosphoglycerate kinas…
GO:1990145	maintenance of translational fidelity	0.00015	0.00564	10.61	4935	5	372	4	[RPL3 - ribosomal 60s subunit protein l3, EFT2 - eft2p, EFB1 - efb1p, EFT1 - eft1p]
GO:0009117	nucleotide metabolic process	0.00017	0.00634	1.97	4935	209	372	31	[TDH2 - tdh2p, TKL1 - transketolase tkl1, HAM1 - ham1p, FBA1 - fructose-bisphosphate aldolase fba1, URA5 - orotate phosphoribosyltransferase ura5, IMD4 - imp dehydrogenase imd4, ADK1 - adenylate kinase adk1, PDC1 - indolepyruvate decarboxylase 1, PGI1 - glucose-6-phosphate isomerase, PGK1 - phosphoglycerate kinase, FAA4 - long-chain fatty acid-coa ligase faa4, URA4 - dihydroorotase, GUK1 - guanyl…
GO:0009199	ribonucleoside triphosphate metabolic process	0.000184	0.00684	2.95	4935	63	372	14	[TDH2 - tdh2p, FBA1 - fructose-bisphosphate aldolase fba1, URA2 - ura2p, TPI1 - triose-phosphate isomerase tpi1, IMD4 - imp dehydrogenase imd4, TDH3 - glyceraldehyde-3-phosphate dehydrogenase (phosphorylating) tdh3, ADK1 - adenylate kinase adk1, PDC1 - indolepyruvate decarboxylase 1, PGK1 - phosphoglycerate kinase, PGI1 - glucose-6-phosphate isomerase, URA7 - ctp synthase ura7, CDC19 - pyruvate k…
GO:0009112	nucleobase metabolic process	0.000225	0.0083	3.69	4935	36	372	10	[URA7 - ctp synthase ura7, URA4 - dihydroorotase, URA1 - dihydroorotate dehydrogenase, URA2 - ura2p, HPT1 - hypoxanthine phosphoribosyltransferase, URA5 - orotate phosphoribosyltransferase ura5, ADO1 - ado1p, ADE5,7 - bifunctional aminoimidazole ribotide synthase/glycinamide ribotide synthase, APT1 - adenine phosphoribosyltransferase apt1, AAH1 - adenine deaminase]
GO:0042255	ribosome assembly	0.000232	0.00848	7.37	4935	9	372	5	[TIF5 - tif5p, FUN12 - fun12p, RPS26B - ribosomal 40s subunit protein s26b, NIP7 - nip7p, RPS26A - ribosomal 40s subunit protein s26a]
GO:0046037	GMP metabolic process	0.000232	0.00842	7.37	4935	9	372	5	[GUA1 - gmp synthase (glutamine-hydrolyzing), GUK1 - guanylate kinase, HPT1 - hypoxanthine phosphoribosyltransferase, IMD4 - imp dehydrogenase imd4, IMD3 - imp dehydrogenase imd3]
GO:0009141	nucleoside triphosphate metabolic process	0.000234	0.00847	2.76	4935	72	372	15	[TDH2 - tdh2p, HAM1 - ham1p, TPI1 - triose-phosphate isomerase tpi1, FBA1 - fructose-bisphosphate aldolase fba1, URA2 - ura2p, IMD4 - imp dehydrogenase imd4, TDH3 - glyceraldehyde-3-phosphate dehydrogenase (phosphorylating) tdh3, ADK1 - adenylate kinase adk1, PDC1 - indolepyruvate decarboxylase 1, PGI1 - glucose-6-phosphate isomerase, PGK1 - phosphoglycerate kinase, URA7 - ctp synthase ura7, CDC1…
GO:1901293	nucleoside phosphate biosynthetic process	0.000241	0.00864	2.15	4935	148	372	24	[TDH2 - tdh2p, TPI1 - triose-phosphate isomerase tpi1, FBA1 - fructose-bisphosphate aldolase fba1, URA5 - orotate phosphoribosyltransferase ura5, URA2 - ura2p, HPT1 - hypoxanthine phosphoribosyltransferase, ADO1 - ado1p, IMD4 - imp dehydrogenase imd4, TDH3 - glyceraldehyde-3-phosphate dehydrogenase (phosphorylating) tdh3, ADK1 - adenylate kinase adk1, PGI1 - glucose-6-phosphate isomerase, PGK1 - …
GO:0006753	nucleoside phosphate metabolic process	0.000262	0.00934	1.92	4935	214	372	31	[TKL1 - transketolase tkl1, TDH2 - tdh2p, HAM1 - ham1p, FBA1 - fructose-bisphosphate aldolase fba1, URA5 - orotate phosphoribosyltransferase ura5, IMD4 - imp dehydrogenase imd4, ADK1 - adenylate kinase adk1, PDC1 - indolepyruvate decarboxylase 1, PGI1 - glucose-6-phosphate isomerase, PGK1 - phosphoglycerate kinase, FAA4 - long-chain fatty acid-coa ligase faa4, URA4 - dihydroorotase, GUK1 - guanyl…
GO:0051656	establishment of organelle localization	0.000319	0.0113	2.51	4935	90	372	17	[RPS3 - ribosomal 40s subunit protein s3, RPL40B - ubiquitin-ribosomal 60s subunit protein l40b fusion protein, RPL1B - ribosomal 60s subunit protein l1b, ZUO1 - zuo1p, NOG1 - nog1p, RRS1 - rrs1p, RPL40A - ubiquitin-ribosomal 60s subunit protein l40a fusion protein, SDA1 - sda1p, RPL1A - ribosomal 60s subunit protein l1a, SSB2 - hsp70 family atpase ssb2, NUG1 - nug1p, LTV1 - ltv1p, SCP160 - scp16…
GO:0006757	ATP generation from ADP	0.000334	0.0117	4.25	4935	25	372	8	[TDH2 - tdh2p, TPI1 - triose-phosphate isomerase tpi1, FBA1 - fructose-bisphosphate aldolase fba1, TDH3 - glyceraldehyde-3-phosphate dehydrogenase (phosphorylating) tdh3, CDC19 - pyruvate kinase cdc19, GPM1 - phosphoglycerate mutase gpm1, PGK1 - phosphoglycerate kinase, PGI1 - glucose-6-phosphate isomerase]
GO:0006096	glycolytic process	0.000334	0.0116	4.25	4935	25	372	8	[TDH2 - tdh2p, TPI1 - triose-phosphate isomerase tpi1, FBA1 - fructose-bisphosphate aldolase fba1, TDH3 - glyceraldehyde-3-phosphate dehydrogenase (phosphorylating) tdh3, CDC19 - pyruvate kinase cdc19, GPM1 - phosphoglycerate mutase gpm1, PGI1 - glucose-6-phosphate isomerase, PGK1 - phosphoglycerate kinase]
GO:0009144	purine nucleoside triphosphate metabolic process	0.000341	0.0118	2.92	4935	59	372	13	[TDH2 - tdh2p, HAM1 - ham1p, FBA1 - fructose-bisphosphate aldolase fba1, TPI1 - triose-phosphate isomerase tpi1, IMD4 - imp dehydrogenase imd4, TDH3 - glyceraldehyde-3-phosphate dehydrogenase (phosphorylating) tdh3, ADK1 - adenylate kinase adk1, PDC1 - indolepyruvate decarboxylase 1, PGI1 - glucose-6-phosphate isomerase, PGK1 - phosphoglycerate kinase, CDC19 - pyruvate kinase cdc19, GPM1 - phosph…
GO:0009201	ribonucleoside triphosphate biosynthetic process	0.000366	0.0126	3.06	4935	52	372	12	[URA7 - ctp synthase ura7, TDH2 - tdh2p, TPI1 - triose-phosphate isomerase tpi1, URA2 - ura2p, FBA1 - fructose-bisphosphate aldolase fba1, IMD4 - imp dehydrogenase imd4, TDH3 - glyceraldehyde-3-phosphate dehydrogenase (phosphorylating) tdh3, CDC19 - pyruvate kinase cdc19, GPM1 - phosphoglycerate mutase gpm1, IMD3 - imp dehydrogenase imd3, PGI1 - glucose-6-phosphate isomerase, PGK1 - phosphoglycer…
GO:0000055	ribosomal large subunit export from nucleus	0.00042	0.0144	3.73	4935	32	372	9	[RPL1A - ribosomal 60s subunit protein l1a, RPL40B - ubiquitin-ribosomal 60s subunit protein l40b fusion protein, NUG1 - nug1p, RPL1B - ribosomal 60s subunit protein l1b, ARX1 - arx1p, RRS1 - rrs1p, RPL40A - ubiquitin-ribosomal 60s subunit protein l40a fusion protein, SDA1 - sda1p, MRT4 - mrt4p]
GO:0044205	'de novo' UMP biosynthetic process	0.000422	0.0143	8.84	4935	6	372	4	[URA4 - dihydroorotase, URA1 - dihydroorotate dehydrogenase, URA2 - ura2p, URA5 - orotate phosphoribosyltransferase ura5]
GO:0000464	endonucleolytic cleavage in ITS1 upstream of 5.8S rRNA from tricistronic rRNA transcript (SSU-rRNA, 5.8S rRNA, LSU-rRNA)	0.000425	0.0143	13.27	4935	3	372	3	[BRX1 - brx1p, DBP3 - rna-dependent atpase dbp3, RRP5 - rrp5p]
GO:1901070	guanosine-containing compound biosynthetic process	0.000435	0.0146	6.63	4935	10	372	5	[GUA1 - gmp synthase (glutamine-hydrolyzing), GUK1 - guanylate kinase, HPT1 - hypoxanthine phosphoribosyltransferase, IMD4 - imp dehydrogenase imd4, IMD3 - imp dehydrogenase imd3]
GO:0009165	nucleotide biosynthetic process	0.00045	0.015	2.1	4935	145	372	23	[TDH2 - tdh2p, TPI1 - triose-phosphate isomerase tpi1, FBA1 - fructose-bisphosphate aldolase fba1, URA5 - orotate phosphoribosyltransferase ura5, URA2 - ura2p, HPT1 - hypoxanthine phosphoribosyltransferase, ADO1 - ado1p, IMD4 - imp dehydrogenase imd4, TDH3 - glyceraldehyde-3-phosphate dehydrogenase (phosphorylating) tdh3, ADK1 - adenylate kinase adk1, PGI1 - glucose-6-phosphate isomerase, PGK1 - …
GO:0042866	pyruvate biosynthetic process	0.000451	0.0149	4.08	4935	26	372	8	[TDH2 - tdh2p, TPI1 - triose-phosphate isomerase tpi1, FBA1 - fructose-bisphosphate aldolase fba1, TDH3 - glyceraldehyde-3-phosphate dehydrogenase (phosphorylating) tdh3, CDC19 - pyruvate kinase cdc19, GPM1 - phosphoglycerate mutase gpm1, PGK1 - phosphoglycerate kinase, PGI1 - glucose-6-phosphate isomerase]
GO:0031503	protein-containing complex localization	0.00074	0.0243	2.41	4935	88	372	16	[RPS3 - ribosomal 40s subunit protein s3, RPL40B - ubiquitin-ribosomal 60s subunit protein l40b fusion protein, RPL1B - ribosomal 60s subunit protein l1b, ZUO1 - zuo1p, NOG1 - nog1p, RRS1 - rrs1p, RPL40A - ubiquitin-ribosomal 60s subunit protein l40a fusion protein, SDA1 - sda1p, RPL1A - ribosomal 60s subunit protein l1a, SSB2 - hsp70 family atpase ssb2, NUG1 - nug1p, LTV1 - ltv1p, ARB1 - atp-bin…
GO:0019856	pyrimidine nucleobase biosynthetic process	0.000748	0.0244	6.03	4935	11	372	5	[URA7 - ctp synthase ura7, URA4 - dihydroorotase, URA1 - dihydroorotate dehydrogenase, URA5 - orotate phosphoribosyltransferase ura5, URA2 - ura2p]
GO:0098781	ncRNA transcription	0.000751	0.0244	2.84	4935	56	372	12	[RPA43 - rpa43p, RPB5 - rpb5p, RPB8 - rpb8p, POL5 - pol5p, RPA34 - rpa34p, RPC40 - rpc40p, RPC31 - rpc31p, RPA135 - rpa135p, RPO26 - rpo26p, RPA190 - rpa190p, RPA12 - rpa12p, RPA49 - rpa49p]
GO:0009142	nucleoside triphosphate biosynthetic process	0.000751	0.0242	2.84	4935	56	372	12	[URA7 - ctp synthase ura7, TDH2 - tdh2p, TPI1 - triose-phosphate isomerase tpi1, URA2 - ura2p, FBA1 - fructose-bisphosphate aldolase fba1, IMD4 - imp dehydrogenase imd4, TDH3 - glyceraldehyde-3-phosphate dehydrogenase (phosphorylating) tdh3, CDC19 - pyruvate kinase cdc19, GPM1 - phosphoglycerate mutase gpm1, IMD3 - imp dehydrogenase imd3, PGI1 - glucose-6-phosphate isomerase, PGK1 - phosphoglycer…
GO:0006165	nucleoside diphosphate phosphorylation	0.000784	0.0252	3.79	4935	28	372	8	[TDH2 - tdh2p, TPI1 - triose-phosphate isomerase tpi1, FBA1 - fructose-bisphosphate aldolase fba1, TDH3 - glyceraldehyde-3-phosphate dehydrogenase (phosphorylating) tdh3, CDC19 - pyruvate kinase cdc19, GPM1 - phosphoglycerate mutase gpm1, PGI1 - glucose-6-phosphate isomerase, PGK1 - phosphoglycerate kinase]
GO:0046939	nucleotide phosphorylation	0.000784	0.025	3.79	4935	28	372	8	[TDH2 - tdh2p, TPI1 - triose-phosphate isomerase tpi1, FBA1 - fructose-bisphosphate aldolase fba1, TDH3 - glyceraldehyde-3-phosphate dehydrogenase (phosphorylating) tdh3, CDC19 - pyruvate kinase cdc19, GPM1 - phosphoglycerate mutase gpm1, PGK1 - phosphoglycerate kinase, PGI1 - glucose-6-phosphate isomerase]
GO:1901292	nucleoside phosphate catabolic process	0.000863	0.0273	3.41	4935	35	372	9	[TDH2 - tdh2p, HAM1 - ham1p, TPI1 - triose-phosphate isomerase tpi1, FBA1 - fructose-bisphosphate aldolase fba1, TDH3 - glyceraldehyde-3-phosphate dehydrogenase (phosphorylating) tdh3, CDC19 - pyruvate kinase cdc19, GPM1 - phosphoglycerate mutase gpm1, PGI1 - glucose-6-phosphate isomerase, PGK1 - phosphoglycerate kinase]
GO:0009205	purine ribonucleoside triphosphate metabolic process	0.000888	0.028	2.79	4935	57	372	12	[TDH2 - tdh2p, TPI1 - triose-phosphate isomerase tpi1, FBA1 - fructose-bisphosphate aldolase fba1, IMD4 - imp dehydrogenase imd4, TDH3 - glyceraldehyde-3-phosphate dehydrogenase (phosphorylating) tdh3, CDC19 - pyruvate kinase cdc19, GPM1 - phosphoglycerate mutase gpm1, ADK1 - adenylate kinase adk1, IMD3 - imp dehydrogenase imd3, PDC1 - indolepyruvate decarboxylase 1, PGK1 - phosphoglycerate kinas…
