# Supplementary material for: A new protocol for single-cell RNA-seq reveals stochastic gene expression during lag phase in budding yeast
Source: eLife. 2020 May 18;9:e55320. doi: 10.7554/eLife.55320 (PMC7259953; doi:10.7554/eLife.55320)
Supplement: Supplementary file 3. [file elife-55320-supp3.csv]

gene	cluster
AXL2	1
MVD1	1
TOP2	1
ORC4	1
RBG2	1
HEM12	1
TOG1	1
GCD14	1
TSR3	1
HDA1	1
IOC4	1
PRP3	1
BEM4	1
RUD3	1
RKR1	1
IML3	1
GAT2	1
HAP4	1
TUP1	1
RRT14	1
SNM1	1
BAS1	1
HMS1	1
YOX1	1
PHO5	1
FIT2	1
FUN30	1
SRL2	1
SMP3	1
CSE4	1
OST4	1
GWT1	1
GIM4	1
PDC6	1
DAN1	1
SPO22	1
MCD4	2
LSM7	2
TOS6	2
EMG1	2
URA2	2
RRP17	2
RRS1	2
FET4	2
HSP104	2
HSP82	2
ENO1	2
HSP30	2
TRM3	2
ESF1	2
GLY1	2
SSB1	2
FES1	2
TOS1	2
DRS1	2
PRP46	2
GSY1	2
PDR5	2
ENB1	2
PWP1	2
RLP7	2
STP4	2
ORM2	2
RPL2B	2
RPL2A	2
POL5	2
DBP2	2
RPP0	2
OLA1	2
TYE7	2
PIN3	2
CDC19	2
FAA4	2
SES1	2
NSA2	2
SSB2	2
BTN2	2
YEF3	2
ZPR1	2
EFT2	2
PGI1	2
HXT3	2
JJJ1	2
ICY2	2
ENP2	2
CBF5	2
ARO4	2
FAS2	2
UPC2	2
MRT4	2
RTT10	2
UTP10	2
MRD1	2
MAK5	2
FCY2	2
SAM2	2
PRT1	2
IRC7	2
RPL22A	2
ARG1	2
ZRT1	2
ZEO1	2
ECL1	2
HSP26	2
NOB1	2
ECM16	2
SSA1	2
HSC82	2
PDC1	2
PGK1	2
ZUO1	2
HSP10	2
ART5	2
UTP8	2
ALD5	2
AEP3	2
PGA3	2
SQT1	2
HGH1	2
NOC3	2
TMA22	2
TIP1	2
ERG2	2
SED1	2
URN1	2
BUD27	2
FAP1	2
PMP1	2
RRP36	2
RTT102	2
CCW12	2
ASG1	2
DCP1	2
GYL1	2
ELP3	2
ANB1	2
KRE33	2
PUF6	2
RPL12A	3
RPL31B	3
RPL33A	3
RPS23B	3
RPS17B	3
RPS16A	3
RPL43A	3
RPS2	3
RPL26B	3
RPS18B	3
RPL11B	3
RPS10B	3
RPS16B	3
RPL24B	3
RPL28	3
RPL30	3
RPL8B	3
RPL16A	3
RPL37B	3
RPS11B	3
RPP2A	3
RPL12B	3
RPL21B	3
RPL25	3
RPL26A	3
RPL17A	3
RPS15	3
PRO1	3
RPL1A	3
DPH1	3
LHP1	3
RPL9A	3
RPS5	3
RPL7A	3
RPS4A	3
RPL3	3
RPP2B	3
RPS3	3
RPL6A	3
GUA1	3
RPL21A	3
RPS17A	3
GPM1	3
RPL16B	3
RPL13B	3
RPS1B	3
RPL18A	3
RPS12	3
RPS9B	3
RPS6A	3
TMA19	3
RPS31	3
RPS13	3
RPL5	3
IMD4	3
GSP1	3
RPS26A	3
RPL13A	3
RPL19A	3
RPS6B	3
RPL40A	3
RPL24A	3
RPL11A	3
EFB1	3
RPL40B	3
HXT6	3
NAB6	3
RBG1	3
ASP1	3
YVH1	3
RPS24A	3
RPL37A	3
RPS23A	3
SMC3	3
NOP6	3
SFK1	3
INO2	3
UTP25	3
PST1	3
PIR1	3
CRH1	3
RPL20A	4
RPS28A	4
RPL42A	4
RPS19B	4
RPL36B	4
RPL12A	4
RPL32	4
RPS7A	4
RPL43A	4
RPS2	4
RPL23B	4
RPL31B	4
TSR2	4
RPL26B	4
RPS18B	4
RPL11B	4
RPS10B	4
RPL33A	4
RPS23B	4
RPS16A	4
RPS16B	4
RPL24B	4
RPL28	4
RPL30	4
RPL8B	4
RPL16A	4
RPL37B	4
RPS11B	4
RPP2A	4
RPL12B	4
RPL21B	4
RPS22A	4
RPL14A	4
RPL17B	4
RPS26B	4
RPS11A	4
RPS18A	4
RPL34B	4
RPL34A	4
RPS19A	4
SRO9	4
DPH1	4
LHP1	4
RPS5	4
RPL7A	4
RPS4A	4
RPL21A	4
RPS17A	4
GPM1	4
RPL16B	4
RPL13B	4
RPL3	4
RPP2B	4
GUA1	4
RPS1B	4
RPL18A	4
RPS12	4
RPS9B	4
RPS6A	4
TMA19	4
RPS31	4
RPS13	4
RPL5	4
IMD4	4
GSP1	4
RPS26A	4
RPL13A	4
RPL19A	4
RPS6B	4
RPL40A	4
RPL24A	4
RPL11A	4
EFB1	4
RPL40B	4
ASP1	4
YVH1	4
RPS24A	4
RPL37A	4
RPS17B	4
RPS23A	4
NAB6	4
RBG1	4
SMC3	4
NOP6	4
SFK1	4
INO2	4
UTP25	4
CRH1	4
SUI2	4
RPL25	4
RPL26A	4
RPL17A	4
RPS15	4
PRO1	4
RPL1A	4
PST1	4
PIR1	4
HOT1	5
BOS1	5
GTR2	5
GCD7	5
RIM1	5
SCM3	5
COS4	5
RAD55	5
APS3	5
FUS3	5
SMD2	5
FLO11	5
PAU8	5
POP4	5
MET17	5
CDC36	5
KGD2	5
PAU17	5
PAU5	5
CDC42	5
ATP17	5
MRPL35	5
CBP6	5
PCL10	5
MOG1	5
KEI1	5
YPT7	5
RNR2	5
SDH6	5
RFS1	5
STE18	5
SAS4	5
ADH3	5
ATG17	5
GAS4	5
BLS1	5
LSO2	5
ASI1	5
ICS2	5
RNR4	5
HOM6	5
NMD4	5
SFC1	5
BUD17	5
REC102	5
TIF2	6
GCD7	6
VPS75	6
UAF30	6
GET3	6
MCH5	6
KAR1	6
HSP150	6
ECM1	6
SPB1	6
EFM3	6
ATF2	6
DDC1	6
RCE1	6
DUS4	6
RPI1	6
RFC2	6
TRL1	6
KTR5	6
JLP2	6
AML1	6
DYN3	6
SEC59	6
SAR1	6
BUD9	6
SMC6	6
FRE8	6
DBP10	6
JJJ3	6
PLM2	6
RPR2	6
TPO2	6
SLI15	6
DAD4	6
FLD1	6
RTP1	6
RMA1	6
RAD10	6
POL32	6
SRN2	6
PRP24	6
RRG8	6
TRF5	6
PGU1	6
ENT4	6
DIG2	6
RSC1	6
DEF1	6
EST1	6
IRC4	7
SUC2	7
PUT1	7
NUM1	7
SMC1	7
SEC3	7
ULS1	7
PPN1	7
BBC1	7
BIT2	7
ESC1	7
INM2	7
AMD1	7
PTK2	7
GDB1	7
TSL1	7
GAL1	7
MPH1	7
MSB3	7
IKS1	7
DAN4	7
FAA3	7
MPC54	7
SWE1	7
EAF7	7
YTA7	7
RBS1	7
KCC4	7
HTB2	7
DGR2	7
PEX1	7
YIA6	7
STE13	7
VPS13	7
SWR1	7
MOT1	7
PSY3	7
MPH3	7
PSK2	7
HKR1	7
SDC1	7
TRE1	7
PAC2	7
TOF1	7
DBF20	7
ACE2	7
IMO32	7
NUD1	7
BIL1	7
PRM9	7
TOP3	7
HRD3	7
GPI11	7
HHF1	7
PPZ1	7
AAD16	7
PAP1	7
CDC6	7
DAL1	7
DAK2	7
RNH203	7
COQ2	7
BIO3	8
HTB1	8
HTA1	8
GLC8	8
LEE1	8
ECM25	8
MDH1	8
YPT1	8
ATP7	8
PHO4	8
SNZ1	8
TMA10	8
ATP3	8
COX13	8
HHF2	8
YMR31	8
IRC23	8
AIM2	8
STF2	8
MRPL36	8
ATP5	8
AIM19	8
GCY1	8
TIM11	8
YOP1	8
MXR2	8
COQ5	8
RIB4	8
COX5B	8
SFT2	8
LYS1	8
PEX11	8
COF1	8
COX7	8
PDX3	8
SSU1	8
MAL33	8
MPO1	8
UPS1	8
PTR2	8
COX26	8
MMF1	8
QCR8	8
ACP1	8
MTC7	8
VPS25	8
MRP8	8
WTM1	8
TRX2	8
ADH2	8
BNS1	8
TKL2	8
CRF1	8
MMS2	8
QCR7	8
ACS1	8
PRX1	8
SPS19	8
GOR1	8
MOH1	8
GRX1	8
INH1	8
GRX2	8
HOR7	8
RDL1	8
GLO1	8
GTT1	8
SDH3	8
HMO1	8
STR2	8
IRC24	8
HSP31	8
ERG28	8
FMP33	8
ATG36	8
AIM29	8
PET10	8
FYV6	8
HOP1	8
AGA1	8
BSC6	8
MDM12	8
LAC1	8
YHC3	8
HBN1	8
PDS1	8
MRPL19	8
HNT2	8
HIS2	8
AIM6	8
RAD33	8
IRC21	8
DAL3	8
AQY1	8
SUV3	8
ALP1	8
ARC15	8
GAL10	8
PER1	8
RDS3	8
CKB2	8
SHC1	8
TDA2	8
AIM33	8
SLD5	8
YAT2	8
UGX2	8
CAR2	8
ATO2	8
ARO10	8
TGL4	8
ENT2	8
PRR2	8
HXT7	8
MIX17	8
POT1	8
BAT2	8
TFS1	8
HSP12	8
GCV3	8
RGI2	8
PAI3	8
SPG4	8
PST2	8
GRE2	8
CTS2	8
SIR4	8
IDP3	8
MRPS12	8
OPI3	8
ECM15	8
CPA1	8
PAC11	8
ERT1	8
NTC20	8
MET12	8
AIM36	8
AGA2	8
AQR1	8
BUD8	8
JHD2	8
MAD3	8
PRP45	8
MFA1	8
KNH1	8
