# Supplementary material for: A new protocol for single-cell RNA-seq reveals stochastic gene expression during lag phase in budding yeast
Source: eLife. 2020 May 18;9:e55320. doi: 10.7554/eLife.55320 (PMC7259953; doi:10.7554/eLife.55320)
Supplement: Supplementary file 4. [file elife-55320-supp4.xlsx]

## Sheet: glu12h_coexp_clusters
gene_name	cluster
CIN2	4
RFA3	4
SSS1	4
RER1	4
GOT1	4
YOP1	4
LEU1	4
RFC5	4
GRX3	4
ATP20	4
RHO3	4
HSP10	4
COX13	4
ADH3	4
CNM67	4
VTC1	4
HIS1	4
HPT1	4
ADK1	4
SUA5	4
YCK3	4
KAP95	4
MGS1	4
MED2	4
SVF1	4
RET3	4
ECM15	4
SAR1	4
MGE1	4
PRE9	4
ATP7	4
CHC1	4
RPA190	4
YPT7	4
TYS1	4
PRT1	4
VMA7	4
GUK1	4
NAT5	4
KES1	4
OST5	4
FPR1	4
TSC3	4
DPH5	4
HCH1	4
RPA12	4
LSM5	4
EMC6	4
DTD1	4
SNX3	4
RIM1	4
APT1	4
FCF1	4
TOM5	4
ISD11	4
GIS2	4
HAS1	4
RIB4	4
RPL18B	4
PAM18	4
BCP1	4
PRS1	4
RPL39	4
TIF4631	4
VMA8	4
SUP45	4
ZEO1	4
AML1	4
ARO7	4
KTR6	4
TIF6	4
PPT1	4
RKI1	4
YPT6	4
RSP5	4
PKR1	4
TSC13	4
EMP70	4
SOP4	4
VMA3	4
SHR3	4
WBP1	4
GET1	4
VOA1	4
ALG12	4
YPQ1	4
EMC3	4
APQ12	4
ZRC1	4
VMA11	4
DGK1	4
HMO1	4
PSF1	4
SNL1	4
ERG2	4
RTT106	4
ERG1	4
ERD2	4
FPR2	4
YPC1	4
MRP2	4
PFA4	4
OAZ1	4
TRI1	4
KCC4	4
POL32	4
LAC1	4
MIX14	4
VMA5	4
SBH2	4
TIF1	4
LSM6	4
RPS27A	4
SPT5	4
HPM1	4
RPS8B	4
RPS30B	4
RPS29A	4
ATX1	4
NIP1	4
SUI1	4
RPS8A	4
CMD1	4
GFA1	4
ACP1	4
RPC19	4
NHP2	4
MMF1	4
RLP24	4
PFY1	4
ARO4	4
ARF1	4
RPL40B	4
POP8	4
RPS22B	4
RPL26A	4
RPS24B	4
TIF11	4
EGD1	4
SNU13	4
RPS0B	4
STM1	4
RPS14A	4
RPL11B	4
RPL31B	4
RPL18A	4
RPL19A	4
RPL13A	4
SEC28	4
COS1	4
COF1	4
RSM27	4
YIP3	4
RSA3	4
RNH203	4
SLD5	4
MET2	4
SRN2	4
EFB1	4
REE1	4
SWI4	4
RRP42	4
MZM1	4
AIM19	4
ILV5	4
RRS1	4
PIL1	4
NOP6	4
NOP16	4
MFA2	4
PRM5	4
PHM6	4
CBF5	4
SST2	4
STR3	4
GCR1	4
HEM3	4
PMA1	4
RPL29	4
RPL34B	4
RPL34A	4
SMT3	4
CCW12	4
MTC7	4
RPL37A	4
RPL8B	4
RPS6A	4
RPS4A	4
RPS24A	4
SUN4	4
DSE1	4
CTS1	4
RPS31	6
RPL14A	6
RPL11A	6
RPL23B	6
RPL19B	6
RPS25A	6
RPS10A	6
RPS18A	6
RPS12	6
RPL26B	6
RPS17A	6
RPP2B	6
RPL38	6
RPS21A	6
RPL42A	6
RPL25	6
RPS1B	6
RPL21A	6
RPL24A	6
RPL7A	6
RPL21B	6
RPL9A	6
RPS3	6
RPL20A	6
RPS11A	6
RPL20B	6
RPS25B	6
RPL12A	6
RPS18B	6
RPS23A	6
RPS16B	6
RPL17A	6
RPS23B	6
RPS9B	6
RPL6B	6
RPL17B	6
RPL27B	6
RPL33A	6
ASC1	6
RPS11B	6
RPS6B	6
RPL13B	6
RPL6A	6
RPS19B	6
TMA19	6
CAF20	6
CDC33	6
RPL16A	6
RPP2A	6
RPS28A	6
RPS10B	6
RPL22A	6
TEF4	6
RPL36A	6
RPS17B	6
RPL15A	6
RPL43B	6
RPS19A	6
RPS1A	6
NTF2	6
RPS30A	6
RPL35A	6
RPL37B	6
RPL33B	6
RPL36B	6
RPS29B	6
RPL1B	6
RPS21B	6
RPL35B	6
RPS28B	6
RPL1A	6
NIP7	6
RPP1A	6
RPL43A	6
RPS26A	6
RPL31A	6
RPS22A	6
RPS5	6
RPS16A	6
RPL28	6
RPS13	6
RPS7A	6
RPL23A	6
RPL12B	6
RPL10	6
RPP1B	6
RPL24B	6
RPL2B	6
RPL40A	6
RPL16B	6
RPL32	6
RPS15	6
RPL30	6
RPS26B	6
TUB2	5
ECM33	5
CIS3	5
HSC82	5
ASE1	5
PHO11	5
PHO5	5
PHO84	5
GPD1	5
NTE1	5
RNR3	5
ARG1	5
PDI1	5
ERG4	5
FET3	5
SIT1	5
PLB2	5
FIT1	5
SSA1	5
SSA2	5
SSE1	5
TRP5	5
PGI1	5
CYS3	5
IPP1	5
ACT1	5
ERG6	5
TKL1	5
POR1	5
FIT3	5
RPP0	5
ENO1	5
NCE103	5
TDH2	5
GPP1	5
SRC1	5
HST3	5
SUR7	5
AIM20	5
SWI5	5
SCW4	5
CHS2	5
ALK1	5
IQG1	5
CDC20	5
FRK1	5
CDC5	5
BUD4	5
NCE102	5
PDC1	5
AHP1	5
HXT3	5
ALD6	5
RPL5	5
YEF3	5
FIT2	5
ERG3	5
SSB1	5
SSB2	5
FBA1	5
ADH1	5
TDH3	5
CDC19	5
CDC21	2
PMI40	2
SCW10	2
TOS6	2
SVS1	2
POL30	2
CLN2	2
RNR1	2
TOS4	2
MCD1	2
RAD27	2
PRY2	2
PSA1	2
FKS1	2
SEC53	2
YNK1	2
MCD4	2
URH1	2
ERV25	2
EMP24	2
ERP3	2
KTR1	2
SUR2	2
PHS1	2
CPT1	2
ERP2	2
ILM1	2
ERP1	2
GPI11	2
ALG5	2
VRG4	2
IRR1	2
OGG1	2
GET3	2
SLG1	2
TFB6	2
PRI2	2
RAD51	2
ALG14	2
POL1	2
PCL1	2
PDS5	2
SEN34	2
GIN4	2
RSR1	2
PIF1	2
DUN1	2
HIF1	2
GRX6	2
MSH2	2
MIF2	2
CDC45	2
CYC1	2
CSI2	2
TOS2	2
CDC9	2
AXL2	2
UNG1	2
POL12	2
CBF2	2
SWE1	2
CSM3	2
MNN1	2
CRH1	2
HO	2
CLB6	2
YOX1	2
CLN1	2
ASF1	2
SPT21	2
RDH54	2
RFA1	2
PMS1	2
RFA2	2
HSL1	2
SMC1	2
SMC3	2
CWP2	2
CPR8	2
SVL3	2
SLK19	2
PDS1	2
SIM1	2
PGM1	2
SPC98	2
SRS2	2
AIM34	2
TUB1	2
GAS3	2
MYO2	2
HHO1	2
STU2	2
FKH1	2
NRM1	2
WSC2	2
GAS1	2
TOP2	2
HHF2	2
HTB1	2
HTA1	2
HHT1	2
HHT2	2
HTA2	2
HTB2	2
HHF1	2
ELO2	2
KAR2	2
PHO88	2
CWH41	2
BGL2	2
KCH1	2
SRL1	2
NUD1	2
ELO3	2
PMT1	2
HXK2	2
HSP12	1
PGK1	1
DIF1	1
EMP47	1
RAD7	1
MUD1	1
LST8	1
UBP2	1
ZTA1	1
STF2	1
TPK1	1
GTT1	1
IMG2	1
MIC60	1
HSP78	1
SHM2	1
PET10	1
FOX2	1
PAC1	1
CIT1	1
DIA1	1
GIS4	1
RAD17	1
SAL1	1
MRPL44	1
ZAP1	1
CAD1	1
CMC1	1
VPS72	1
APC2	1
RRN5	1
AIM41	1
LSO2	1
ADY3	1
MTQ1	1
DUS4	1
MEC1	1
CTS2	1
IBD2	1
PRP45	1
GAP1	1
TKL2	1
HXK1	1
GAD1	1
PGM2	1
GAC1	1
HOR7	1
GLK1	1
TFS1	1
GPH1	1
CYC7	1
BRP1	1
PAI3	1
GDB1	1
FAA1	1
PHM8	1
HSP82	1
PNC1	1
HSP104	1
ARO10	1
SPI1	1
FMP46	1
RTN2	1
HSP42	1
HSP26	1
SSA3	1
INH1	1
GRS2	1
MNS1	1
SOL4	1
MSC1	1
NQM1	1
ALD3	1
HXT7	1
CTT1	1
FMP16	1
PHO89	1
TSA2	1
SNZ1	1
YGP1	1
PDR3	1
ZIP1	1
HBT1	1
GRE1	1
RGM1	1
SFL1	1
GPX1	1
CRF1	1
AFT2	1
RGI1	1
TMA10	1
STE3	1
MBR1	1
DGR1	1
DIT1	1
PAU3	1
SSA4	1
MHT1	1
TMA17	1
PXA2	1
BTN2	1
PUG1	1
MET3	1
MFB1	1
DAL1	1
CTL1	1
SSE2	1
GTO1	1
LYS1	1
COQ4	1
VHR1	1
KIN3	1
SUT1	1
URC2	1
JHD2	1
TIR4	1
PXA1	1
SGV1	1
CKI1	1
SCO2	1
APN2	1
VHS3	1
VPS36	1
YAP5	1
ATG2	1
UBP5	1
GTT2	1
TRF5	1
IBA57	1
UBP11	1
GPM2	1
CAR2	1
MMP1	1
SRB8	1
GIP3	1
OMS1	1
REC107	1
SRL3	1
RCN2	1
MET16	1
RPM2	1
PET117	1
SUR1	1
LDH1	1
PRP5	1
YGK3	1
OCH1	1
HRT1	1
PUS6	1
SNG1	1
PDR15	1
GPM1	3
TPI1	3
HYP2	3
PGA3	3
COX16	3
SAM3	3
DIP5	3
PHO3	3
CLB2	3
DBF2	3
HST4	3
MRH1	3
SPO73	3
SNA2	3
PLP1	3
MFM1	3
PMT5	3
RIB7	3
BLS1	3
LTO1	3
WIP1	3
PNG1	3
SSY5	3
ECO1	3
UPS1	3
YPQ2	3
FLC3	3
THI3	3
PET127	3
GAL10	3
FYV6	3
TOP3	3
ATG29	3
HXT8	3
ATG36	3
ASK1	3
TPM2	3
KAR5	3
THO2	3
CSE2	3
CDC16	3
JHD1	3
SKN1	3
DCN1	3
PDR11	3
OKP1	3
RIM2	3
GND2	3
LCL1	3
SNA4	3
MRP10	3
PRK1	3
SOG2	3
CMC2	3
POP7	3
AAD16	3
SOM1	3
VPS25	3
PUF3	3
NNF1	3
DYN3	3
CMC4	3
GDE1	3
APC5	3
SDH4	3
UPS2	3
MPT5	3
AIM11	3
SGF29	3
MRS4	3
STB6	3
VMS1	3
DAD2	3
ALG3	3
MRM1	3
RRN6	3
IRC6	3
MET10	3
KAP122	3
MSE1	3
LEE1	3
BSC5	3
SYF2	3
AST1	3
SIP1	3
MMS4	3
CDH1	3
AIM33	3
REC102	3
AAR2	3
USE1	3
SIZ1	3
ENV11	3
PCK1	3
QCR9	3
SNZ2	3
SPG5	3
PRR2	3
SHG1	3
RAD30	3
MCM4	3
ORC4	3
PSR2	3
XRS2	3
JID1	3
GGA1	3
NAM2	3
HAL1	3
AGX1	3
BPL1	3
HAP2	3
ATG9	3
CNA1	3
CTR3	3
RRG1	3
BUD28	3
RSB1	3
FPK1	3
LSM8	3
RNP1	3
RGS2	3
PGD1	3
PHM7	3
GEP5	3
IME2	3
CEF1	3
VTI1	3
CTF13	3
CTF3	3
BOI2	3
ATE1	3
PCL8	3
GEX2	3
SPS4	3
PAU17	3
RTT102	3
VBA2	3
BEM4	3
FBP1	3
COS111	3
HEM14	3
SDS3	3
YJU2	3
RRN10	3
SDH6	3
HSK3	3
BNR1	3
ATP19	3
SKI7	3
SPP381	3
RMR1	3
UGO1	3
IDS2	3
SUS1	3
YAF9	3
RCR2	3
DTR1	3
ATG23	3
SRY1	3
PET20	3
GRX4	3
PSP1	3
ARR2	3
OPI7	3
IDP3	3
RRT5	3
MPS2	3
SHC1	3
YIM2	3
VTS1	3
CMR1	3
IMP1	3
DSF1	3
GAL2	3
AAD10	3
SPO19	3
PGU1	3
LDS2	3
STL1	3
VPS65	3
MND1	3
HUR1	3
ADK2	3
CDA1	3
TDP1	3
FUS1	3
THI12	3
PAU20	3
RIM9	3
SMA2	3
IRC14	3
USA1	3
MAL11	3
PRM2	3
SPS22	3
BIO5	3
PDR18	3
SNO2	3
SSY1	3
GLY1	3
INP1	3
GPR1	3
TDA1	3
VPS54	3
BNA4	3
USB1	3
RIM13	3
PAC2	3
RDR1	3
RGI2	3
BSC1	3
AAD6	3
OST4	3
SAW1	3
PET494	3
WSC3	3
GUP2	3
MFG1	3
RFX1	3
HYM1	3
OXP1	3
DCP1	3
RRT6	3
SSK22	3
LDB17	3
FMP30	3
RSM19	3
YEA6	3
FUS2	3
MEK1	3
ATG34	3
HDA1	3
NCA2	3
IES1	3
MRP21	3
MSS1	3
ALP1	3
PET122	3
RTT109	3
FAR11	3
FMP40	3
FMP48	3
VPS69	3
VPS51	3
PET18	3
STE11	3
ISY1	3
ACS1	3
MUS81	3
PDR12	3
SDH2	3
UBA3	3
PEP8	3
SPT14	3
SNT2	3
TDA10	3
ICS2	3
SSL2	3
FAT3	3
COS7	3
NTA1	3
SSQ1	3
PEX19	3
SAP4	3
TRE1	3
PTR2	3
GSM1	3
PET112	3
HOS1	3
NKP1	3
ARP10	3
AAD15	3
SNU23	3
RAD59	3
CSN9	3
ADE17	3
SLM4	3
KXD1	3
NAT4	3
FMP10	3
PFA5	3
STN1	3
MRP20	3
FKH2	3
COG7	3
NDI1	3
VPS61	3
SPS2	3
FYV5	3
GLG2	3
ATP25	3
PPT2	3
MGA1	3
COM2	3
DAS2	3
PAU8	3
BOP2	3
MET32	3
PAU4	3
SNF8	3
HVG1	3
HST2	3
MTH1	3
PAU11	3
CWC25	3
FLO1	3
DOC1	3
MED8	3
IMD1	3
PPM2	3
MRPL11	3
IVY1	3
FLO11	3
PUT1	3
RRT13	3
ZPS1	3
AME1	3
MNE1	3
RIB2	3
UME6	3
MPA43	3
COS5	3
PUS2	3
PRP16	3
IML2	3
ACA1	3
DMC1	3
COX5A	3
CDC13	3
MSB3	3
DAL4	3
PAD1	3
MDM10	3
MGT1	3
MSH3	3
THI13	3
TBS1	3
YAT2	3
DIA3	3
GAL4	3
TEP1	3
CDC7	3
RCY1	3
SFP1	3
PLM2	3
TCA17	3
MAM1	3
MOH1	3
YIG1	3
FUN19	3
IPL1	3
ISM1	3
RAV1	3
OSW2	3
GIP2	3
AQY1	3
SRL2	3
TRP3	3
GAS4	3
SNF3	3
COS12	3
FRE8	3
RMP1	3
YEN1	3
PUS5	3
VAM7	3
MST1	3
MSH4	3
LST7	3
COQ6	3
MRS2	3
ICP55	3
ARE2	3
PSO2	3
CYT1	3
PAU24	3
TPO4	3
MID2	3
DFG16	3
DPB2	3
SSL1	3
CBP6	3
RTC2	3
MAL63	3
FLR1	3
URA10	3
MCP1	3
OSW5	3
GDH2	3
CIR2	3
MAK32	3
ERT1	3
DAL7	3
DBP1	3
HCM1	3
RTA1	3
ADY2	3
SWM1	3
HEL1	3
ELC1	3
EDS1	3
PKP1	3
DCS2	3
SUL1	3
BMT6	3
COR1	3
MSY1	3
GAT2	3
SYG1	3
HIT1	3
SSH4	3
UGX2	3
CAX4	3
CCP1	3
SER3	3
TPO2	3
LUC7	3
CIN5	3
HAP5	3
PCC1	3
PBI2	3
CCR4	3
RRN11	3
HER1	3
MDM36	3
ATG19	3
IRC18	3
RRP36	3
YRF1-3	3
ISR1	3
PSP2	3
PRM8	3
SLD2	3
SCW11	3
SPC72	3
PAC11	3
ADY4	3
MRH4	3
MRPL24	3
VID28	3
PRP11	3
RAD50	3
STB2	3
NDE2	3
CBP4	3
AVT2	3
YEL1	3
PIP2	3
SFC1	3
SPC34	3
ROX1	3
PCI8	3
FAR10	3
UBP7	3
ALY1	3
MND2	3
HPA2	3
ESP1	3
IMO32	3
HOP1	3
PEX29	3
PDC6	3
GMC2	3
SPC24	3
COA4	3
RAD16	3
COY1	3
OAF1	3
PSY3	3
NUT2	3
HPC2	3
PEX17	3
VAB2	3
SLM1	3
CAF130	3
TUS1	3
SSP2	3
SAP1	3
CMR3	3
INO1	3
OAR1	3
FCY22	3
SEM1	3
AYT1	3
PKP2	3
BIL1	3
PRP18	3
SLX8	3
MLH3	3
THI21	3
HIM1	3
MBB1	3
LDB18	3
ESBP6	3
COX5B	3
MSF1	3
BUD26	3
RNY1	3
HER2	3
RTS2	3
THI2	3
CSH1	3
DCR2	3
GPG1	3
TMN2	3
YHC3	3
APC4	3
ASI1	3
ADH5	3
EST1	3
RLF2	3
DON1	3
LTE1	3
PRM15	3
SCM3	3
CTF19	3
HNT2	3
MTG1	3
PEP7	3
VPS16	3
FLO8	3
CEM1	3
QRI7	3
CCE1	3
SWH1	3
NFI1	3
RRN7	3
YME2	3
HXT10	3
PES4	3
RTT101	3
YSP3	3
PTC4	3
SCS3	3
IRC19	3
UPS3	3
COX19	3
YPK2	3
PAU15	3
STB1	3
DUR1,2	3
SPC42	3
BSC3	3
RRI1	3
LSB6	3
SLX4	3
CLD1	3
ECM27	3
AUA1	3
SPG4	3
SNU66	3
BTT1	3
IRC3	3
AMF1	3
ISF1	3
ASR1	3
RMD6	3
PRP24	3
SIL1	3
THI11	3
PSY1	3
TIR2	3
CBK1	3
ROD1	3
CSI1	3
FYV12	3
SHR5	3
SUV3	3
SGF11	3
SAS4	3
AVO2	3
VPS3	3
UBC11	3
GPI19	3
ABZ1	3
PSY4	3
MEP2	3
SPO21	3
RGT1	3
UGA4	3
MTL1	3
FYV1	3
PEF1	3
VPS73	3
CBT1	3
PLB1	3
DAN1	3
MSS18	3
GLN3	3
ERF2	3
EDC1	3
ISU1	3
MPH2	3
HEF3	3
BUD5	3
PRM9	3
PAN3	3
COA2	3
PAU10	3
GUF1	3
AEP1	3
APC9	3
SPS19	3
LSB1	3
NNK1	3
UBX6	3
SPC1	3
MET8	3
LRO1	3
KRE29	3
BUB1	3
SPC110	3
ATG3	3
GEM1	3
REG2	3
YSW1	3
FAR3	3
BXI1	3
PDH1	3
ABM1	3
AFB1	3
PIR3	3
SPO20	3
FEX1	3
ADH2	3
RME1	3
SNF5	3
SLI1	3
ACH1	3
RMA1	3
MUM3	3
SEF1	3
SMP1	3
LCD1	3
TGL3	3
SYC1	3
MMS22	3
PSK1	3
GIS1	3
RIP1	3
POS5	3
GUD1	3
HSP30	3
NRT1	3
RIM8	3
PTK1	3
NGR1	3
DIN7	3
KIP2	3
VTH2	3
GID7	3
COX7	3
NGL1	3
IRC23	3
YPS6	3
GAL7	3
MAL32	3
MAM3	3
DAL82	3
PEP5	3
TPK2	3
ECM18	3
PDR10	3
ATG12	3
FRE7	3
PUT4	3
ACF4	3
HXT11	3
YCH1	3
2020-10-01	3
CDC15	3
OPI8	3
MSN1	3
MEF2	3
IES4	3
CWC23	3
CBF1	3
RSF1	3
MDS3	3
MGR3	3
ULI1	3
APC1	3
THI73	3
NPL3	3
RHB1	3
EBS1	3
BIT61	3
RRG9	3
HFA1	3
ECI1	3
ERS1	3
IDP2	3
COX20	3
MCM21	3
XYL2	3
BLI1	3
TOS8	3
MSN4	3
SHE4	3
TEN1	3
BDH2	3
AFR1	3
RRG8	3
SKS1	3
LPX1	3
SAG1	3
PPR1	3
OPI9	3
TFB5	3
UAF30	3
TCM62	3
MSS11	3
RAD52	3
FIR1	3
HLJ1	3
BOR1	3
RCK1	3
MAC1	3
RTR1	3
FZF1	3
PIG2	3
MEI4	3
PAU23	3
NBP2	3
RAD28	3
AVT3	3
AIM32	3
VPS52	3
VHS1	3
MKK2	3
ECM21	3
PIC2	3
APA2	3
NCE101	3
ATG32	3
WTM2	3
TOK1	3
YET2	3
OPT2	3
CST6	3
MIH1	3
SRX1	3
MRPL28	3
ARG81	3
TDA6	3
MTO1	3
INO2	3
ARR3	3
RAD10	3
DIG2	3
MCM1	3
AEP3	3
GSH1	3
YRO2	3
CAT8	3
MDJ2	3
VPS8	3
VFA1	3
RSM18	3
MPC3	3
ALR1	3
DAL2	3
GMC1	3
MPC54	3
YPS1	3
RTC4	3
COX14	3
CYC8	3
ATG4	3
ATG8	3
FAA2	3
MAL33	3
MMR1	3
AVO1	3
ENT4	3
BIT2	3
RAD24	3
COX17	3
VBA3	3
ATG17	3
CTA1	3
COS4	3
IRS4	3
RTK1	3
OAF3	3
FLO9	3
NGG1	3
CUR1	3
KIN82	3
RPL41A	3
BUD31	3
NDJ1	3
CWC22	3
MCM22	3
IST3	3
EMP46	3
TAX4	3
FLO10	3
KIP1	3
IME1	3
CSM2	3
COS2	3
ZRG8	3
SCD5	3
SPO1	3
CRR1	3
CSR2	3
SLO1	3
SLU7	3
AIM3	3
ARG82	3
IRC10	3
NRG1	3
ELA1	3
ICL1	3
YFH7	3
SUL2	3
DAN4	3
PPZ2	3
FEX2	3
VID22	3
MIG3	3
SMP3	3
YSF3	3
DCC1	3
HAC1	3
HUA2	3
JEN1	3
SIP18	3
FRM2	3
UIP4	3
RIM15	3
RPI1	3
CNN1	3
SDS24	3
SWM2	3
SIP4	3
AMS1	3
HUG1	3
LSO1	3
GGC1	3
HIS4	3
TMT1	3
CPA2	3
SPO23	3
VBA5	3
SGA1	3
MET13	3
ECM10	3
RTR2	3
FMP33	3
CWC24	3
GUT2	3
UBP9	3
SWT1	3
DCG1	3
SLM2	3
SWI1	3
CEP3	3
DIT2	3
MRL1	3
SSN8	3
RRT15	3
CYC2	3
PKH2	3
NUP192	3
IRC9	3
SRT1	3
YRF1-4	3
CIN1	3
ATG13	3
MSL5	3
VPS15	3
MSM1	3
SWF1	3
CMK2	3
DAD4	3
MEP1	3
XBP1	3
TSL1	3
SNO1	3
SPR1	3
ARG80	3
PRM10	3
NPR2	3
MON1	3
GSY2	3
CDC40	3
SNO3	3
STF1	3
VPS20	3
HUA1	3
SMD2	3
AAD14	3
GSY1	3
CUS1	3
CST9	3
JIP4	3
AAD4	3
SMC6	3
DSN1	3
PET191	3
POG1	3
PRY3	3
GEX1	3
CYB2	3
BFA1	3
VPS63	3
PTR3	3
HKR1	3
BNA2	3
HOP2	3
KSS1	3
ROM1	3
RAD4	3
MSH5	3
MRPS8	3
URN1	3
DCI1	3
CRS5	3
THI74	3
BUD9	3
SWD1	3
UBX5	3
HAP4	3
CAN1	3
SWT21	3
RAX1	3
FDH1	3
PRP4	3
LRG1	3
AAD3	3
MPH3	3
PGS1	3
AUS1	3
SLY41	3
AZF1	3
ATG14	3
HXT9	3
FBP26	3
RTG3	3
FUS3	3
FMT1	3
HXT6	3
SPS18	3
DGR2	3
PMP2	3
SNP1	3
CAB3	3
HOT1	3
COX4	3
DAK2	3
PGA1	3
PRP40	3
RSF2	3
XKS1	3
OPI11	3
ALR2	3
SEG2	3
THI4	3
FKS3	3
TFC4	3
MRC1	3
ADI1	3
RAD34	3
BSP1	3
AFI1	3
RUB1	3
STE18	3
SLM3	3
SPR28	3
TRK2	3
DAL5	3
SPH1	3
ADH7	3
RSM25	3
RMD5	3
HFM1	3
PRR1	3
GAS2	3
IRC4	3
TDA7	3
TOG1	3
SFK1	3
COX15	3
MPO1	3
SLM5	3
SIA1	3
SDH5	3
TAM41	3
YAP7	3
SEO1	3
DNF3	3
BUD6	3
PMP1	3
RTT105	3
YEF1	3
ACE2	3
STB3	3
ARK1	3
TES1	3
CCM1	3
PTA1	3
AMD2	3
BYE1	3
MLH1	3
ATG10	3
IMA5	3
ROT1	3
CAF120	3
DDC1	3
MAL31	3
SPO71	3
DOA4	3
SHH3	3
YIA6	3
CHS6	3
FIG2	3
PAU5	3
PMA2	3
FRT2	3
MSG5	3
FEN2	3
CCZ1	3
FYV10	3
GLO4	3
KNH1	3
SMK1	3
RRI2	3
COS10	3
GAL3	3
RGT2	3
HUL4	3
CIT3	3
STP4	3
ATP10	3
RRT1	3
BIO4	3
AIR2	3
WHI5	3
SPC29	3
AIM14	3
YAT1	3
PET111	3
DAD1	3
EPL1	3
PRP21	3
SGO1	3
SHY1	3
MLH2	3
GOR1	3
IGD1	3
DAL3	3
SYM1	3
MET28	3
SDP1	3
SPG1	3
MMS21	3
YMR1	3
ATG1	3
RAD26	3
PYK2	3
ENA1	3
SPO22	3
NGL3	3
SHH4	3
MGR1	3
PDC5	3
CAT2	3
RTG1	3
HED1	3
JSN1	3
BUD13	3
RAX2	3
SLH1	3
MIG1	3
MRK1	3
RPR2	3
RRT7	3
DPB11	3
PFK27	3
ATG15	3
ACM1	3
ASG7	3
AGP2	3
PHR1	3
TEA1	3
TAZ1	3
SIP2	3
ODC1	3
MSN2	3
MTC2	3
PRM1	3
MAL12	3
PIG1	3
MPS3	3
IML3	3
GIP1	3
APJ1	3
GAL1	3
PRP38	3
EST2	3
MSD1	3
VTH1	3
YAK1	3
SAS5	3
GTO3	3
DSS1	3
KNS1	3
RPL41B	3
MCM5	3
SDH1	3
MED1	3
ART5	3
RIF2	3
BRN1	3
PCD1	3
SAE2	3
MET30	3
FAB1	3
COG1	3
FMP45	3
PMC1	3
GLG1	3
ATG38	3
ZIP2	3
YRR1	3
TAR1	3
INP52	3
INO4	3
FIN1	3
BBP1	3
CDD1	3
BIO3	3
NMA2	3
PAU2	3
ATH1	3
MLS1	3
AAC1	3
IRC8	3
YME1	3
ATG20	3
SKP2	3
SAF1	3
USV1	3
SFG1	3
RTS3	3
MCH2	3
CLB4	3
MPM1	3
ALD2	3
GIT1	3
SPR3	3
MST27	3
LOT6	3
SEG1	3
GLC3	3
HPR1	3
SLI15	3
HTZ1	3
YHP1	3
BUD8	3
ARG5,6	3
ARG3	3
HES1	3
ENB1	3
OLE1	3
SMX2	3
TMA7	3
HIS2	3
RRT14	3
SMD3	3
RRP14	3
CHZ1	3
MPP6	3
YKE2	3
SNZ3	3
JLP1	3
KDX1	3
CEX1	3
MED11	3
EAP1	3
YKU70	3
TSA1	3
STE6	3
MFA1	3
PRY1	3
UTH1	3
TIP1	3
STE2	3
RPS7B	3
RPS2	3
RPL3	3
ESC8	3
GIC2	3
ELG1	3
EXG1	3
HXT2	3
CDC6	3
AGA2	3
PCL9	3
BAR1	3
FAR1	3
ASH1	3
SIC1	3
NIS1	3
GAT1	3
HSP150	3
AMN1	3
DSE3	3
DSE4	3
EGT2	3
CHS1	3
AIM44	3
PST1	3
PIR1	3

## Sheet: inlag1h_coexp_clusters
gene_name	cluster
RPS25A	3
RPP2A	3
RPS12	3
RPL6B	3
RPS21B	3
RPS30A	3
RPS31	3
RPL16B	3
RPS17A	3
RPL7A	3
RPS13	3
RPS9B	3
RPS0A	3
RPL19B	3
RPL2B	3
RPL42A	3
RPS15	3
RPL11A	3
RPL24A	3
RPS26A	3
RPL29	3
RPL31A	3
PDC1	3
YEF3	3
RPP0	3
RPS1B	3
RPS5	3
RPL21B	3
RPL24B	3
RPL20A	3
RPS28A	3
RPL16A	3
RPS6A	3
RPS6B	3
RPS10B	3
RPS7A	3
RPL37A	3
RPL8B	3
RPS19B	3
RPS18B	3
RPL36B	3
RPS11A	3
RPL30	3
RPS24A	3
RPL40A	3
RPL17B	3
RPL27B	3
RPS16B	3
RPS16A	3
RPL20B	3
RPL14A	3
RPL32	3
RPS18A	3
RPL26B	3
RPS22A	3
RPS26B	3
RPL23B	3
RPS19A	3
RPS23B	3
RPS21A	3
RPL33A	3
RPS23A	3
RPS24B	3
RPS25B	3
RPS29B	3
RPL28	3
RPL23A	3
RPS2	3
RPL43A	3
RPL34B	3
RPL34A	3
RPS10A	3
RPL15A	3
BTN2	3
CCW12	1
YOP1	1
MRP8	1
GRX2	1
SDH3	1
ARA1	1
QCR8	1
GLO1	1
RDL1	1
PDR8	1
YNK1	1
TAL1	1
COX13	1
YET3	1
ACT1	1
COQ5	1
HFD1	1
GSP2	1
OPI10	1
RSM10	1
SPC3	1
MNT4	1
COX12	1
TPK1	1
PUP2	1
APE2	1
PRX1	1
TFS1	1
CMC4	1
GCY1	1
CYC7	1
BDH1	1
REE1	1
GTT1	1
RFS1	1
DIP5	1
SNX4	1
WTM1	1
YDC1	1
UGX2	1
COX4	1
ATP3	1
AIM6	1
PFK26	1
AIM19	1
COX5B	1
YPC1	1
INH1	1
EMI2	1
BOP2	1
OM14	1
ATP2	1
RRT8	1
GLK1	1
CAR1	1
TMA17	1
ISF1	1
MRK1	1
UBS1	1
ECI1	1
HXK1	1
MAL63	1
IDP3	1
PER33	1
CPR4	1
URA10	1
FAA2	1
ENV7	1
MGE1	1
YCP4	1
JID1	1
ULA1	1
BAT2	1
VPS45	1
GRX1	1
PRM5	1
WSC3	1
ATG36	1
EEB1	1
GRE2	1
YTH1	1
MAL11	1
GIP2	1
GOR1	1
ALT1	1
PHM7	1
ECM3	1
ALD2	1
GLG1	1
PET10	1
SAP4	1
PSA1	1
HHT1	1
GAD1	1
ATO2	1
COQ9	1
GPD1	1
SOD1	1
DDR2	1
RSB1	1
GPH1	1
ASC1	1
RPL3	1
RAS2	1
CPR5	1
SDH6	1
HOR7	1
PNC1	1
HSP10	1
GLN1	1
ZEO1	1
TDH3	1
PGK1	1
TDH1	1
ENO1	1
ICY1	1
ARO10	1
PGM2	1
UGP1	1
CIT2	1
CIT1	1
NCE103	1
PRR2	1
USV1	1
GSY2	1
SDS24	1
PIG2	1
FMP16	1
HSP12	1
PUT1	1
VHR1	1
RGI2	1
DCS2	1
MCR1	1
TSL1	1
IGD1	1
CTS1	1
PHD1	1
YTP1	1
MAL31	1
CSH1	1
MSC1	1
GDB1	1
SOL4	1
HXT3	1
FMP48	1
PIC2	1
YGP1	1
NCE102	1
ALD4	1
HXT7	1
HXT6	1
RGI1	1
TMA10	1
MPC3	1
HXT2	1
PUN1	1
ALD6	1
SPI1	1
BUD30	2
INO1	2
MSH4	2
RPB9	2
RAD59	2
LCP5	2
CLN1	2
MMS21	2
DIT2	2
UBC11	2
GYL1	2
MCM2	2
HMX1	2
HIM1	2
IMP1	2
VTH2	2
FAP7	2
CLN2	2
FLO8	2
MEI5	2
PRM6	2
SGA1	2
RUB1	2
PRP18	2
BRR1	2
GUP1	2
LPP1	2
TFC6	2
FYV12	2
TTI1	2
PCL1	2
CWP2	2
SCW10	2
CTF18	2
STR3	2
PHO23	2
FYV6	2
GEA1	2
PSK2	2
THI7	2
PUS1	2
HOM3	2
MCM22	2
EPO1	2
RKR1	2
RMI1	2
ARG8	2
VAC17	2
PUS7	2
RLF2	2
POP3	2
REC8	2
PBP2	2
TAH18	2
PRP4	2
PCL2	2
SNF5	2
VTH1	2
DXO1	2
FCY22	2
ARP10	2
BSC3	2
NUP192	2
SLP1	2
YSW1	2
GIT1	2
RAD18	2
AGP3	2
PHO91	2
MEC3	2
RFM1	2
DRS2	2
RKM2	2
BIL1	2
YOX1	2
CDC5	2
MSB4	2
SWH1	2
SAS5	2
CWC22	2
SML1	2
YOS9	2
SSK22	2
LDS2	2
RIO2	2
GEP5	2
BTT1	2
RIB2	2
SLH1	2
CTF19	2
ARP7	2
HKR1	2
RAD5	2
HEK2	2
NBP1	2
CCE1	2
GEP7	2
NSE1	2
BLI1	2
PFD1	2
TOD6	2
MSH2	2
CDC9	2
PTI1	2
DMC1	2
ANP1	2
TEN1	2
RAX2	2
ERS1	2
RAD16	2
RIM2	2
PAD1	2
SNZ1	2
SNO1	2
AIM33	2
MAK31	2
DYN3	2
RRP15	2
MRPL27	2
EMP70	2
AQR1	2
UBR2	2
RNH203	2
PEX19	2
ASK1	2
GPI13	2
DUS4	2
CHA4	2
FRT2	2
MNL2	2
LST7	2
SAS2	2
ALK2	2
HCM1	2
PHO4	2
ISC1	2
HEM13	2
ECM1	2
COQ2	2
MET8	2
SUL1	2
YHP1	2
CIN8	2
FRE2	2
YAP6	2
MET13	2
TAD3	2
SUT2	2
OPI9	2
ZDS2	2
ARG3	2
RRP12	2
CRR1	2
BNI5	2
SNZ2	2
HUA2	2
MSB2	2
CUS1	2
UME6	2
TSC11	2
DCN1	2
YRF1-3	2
BRF1	2
BNA5	2
EAF1	2
MNN5	2
NUT2	2
CIN2	2
ECM9	2
ODC1	2
RTR2	2
SLM3	2
TIR2	2
POC4	2
SPG3	2
JLP2	2
ATG15	2
NOP19	2
MSL1	2
FLO11	2
FAR7	2
CSM1	2
IRC23	2
HMG1	2
MRS2	2
MMS4	2
CYC1	2
PRI2	2
PCF11	2
GRE1	2
GAL3	2
SPC110	2
ELC1	2
KTI11	2
SPC34	2
RRP6	2
MAD2	2
IBD2	2
SPO74	2
PDR11	2
SPP381	2
YPQ2	2
PSY3	2
YIM2	2
VIK1	2
SPC29	2
YRF1-2	2
MRP10	2
ADH2	2
SUL2	2
PAU8	2
IRC4	2
YCG1	2
TPM2	2
SAE2	2
FBP1	2
CSI2	2
PRM2	2
CAF120	2
PAC1	2
IMA5	2
TFB5	2
SUA5	2
MGS1	2
MET32	2
TAD2	2
SLK19	2
APT2	2
COX19	2
LUC7	2
BUD9	2
SER2	2
RSM22	2
BUD5	2
LSO2	2
OAF3	2
RAD57	2
GIP3	2
BSP1	2
SLS1	2
BMT5	2
SEM1	2
BYE1	2
SSN3	2
HXT11	2
TOP3	2
HO	2
SRB7	2
YAE1	2
SCW11	2
UBC12	2
BUD21	2
PRP31	2
FEX1	2
CDC45	2
ELG1	2
VPS62	2
AAR2	2
HXT9	2
REX4	2
AVT2	2
BUD4	2
SRX1	2
DAL81	2
RED1	2
DOT1	2
VHC1	2
PRP11	2
RMA1	2
RMP1	2
ATG29	2
POP6	2
NKP2	2
OST4	2
ATG18	2
PET111	2
CHS2	2
KCC4	2
MEP2	2
RDR1	2
HIR1	2
HSL1	2
FMP25	2
PBA1	2
AIF1	2
PUS2	2
CAB4	2
PDC2	2
ASP3-4	2
KIP2	2
MNS1	2
THI3	2
SAS4	2
THI80	2
MED7	2
BMT6	2
CYT2	2
TMS1	2
SFT1	2
TFC7	2
KRE29	2
RTT102	2
GAP1	2
TRM7	2
MTD1	2
SOM1	2
ECM31	2
PMS1	2
ALK1	2
MRM1	2
PUS9	2
HFI1	2
WHI5	2
OCA1	2
MDM12	2
BUD14	2
ATG23	2
SWC3	2
UGA4	2
FKS3	2
HED1	2
HPA2	2
SLM2	2
BSC2	2
UPF3	2
DUS3	2
GID7	2
EXG1	2
JHD2	2
YVH1	2
ABF1	2
PAU4	2
KIN4	2
MSB1	2
RRT12	2
THI21	2
STU1	2
RAD50	2
RNH70	2
PGA1	2
NAT4	2
SPC72	2
AMA1	2
MHT1	2
PPT2	2
VTA1	2
RFX1	2
IMH1	2
IFH1	2
IME2	2
PES4	2
BRN1	2
ERV15	2
KRE6	2
SFL1	2
OGG1	2
MET7	2
CWC15	2
MMR1	2
MST27	2
HXT13	2
MCH1	2
MND1	2
COX10	2
IOC3	2
PAU24	2
FKH2	2
SCM4	2
CWC25	2
BOI2	2
SNP1	2
BUD31	2
MNN1	2
SME1	2
NUP188	2
MRP2	2
RSC1	2
PMA2	2
FLO10	2
BRR6	2
SAS3	2
UGA3	2
ESC8	2
GAL2	2
ACA1	2
TEA1	2
PCC1	2
TPO5	2
RGA1	2
TRM13	2
AGA2	2
NRT1	2
RRN11	2
RTP1	2
PEX6	2
PUG1	2
SKP2	2
SRO77	2
SIR2	2
CDC123	2
SWD3	2
SMX2	2
ADF1	2
FUS3	2
PRP2	2
MCM3	2
PEX13	2
AKR2	2
YAP7	2
PEF1	2
CAF40	2
USA1	2
DDC1	2
GYP5	2
SAD1	2
ACE2	2
BCK1	2
TPK3	2
PDS5	2
ATG13	2
TPC1	2
WAR1	2
IRC16	2
BNA4	2
CSM2	2
LSG1	2
RIA1	2
MGR1	2
NKP1	2
PMT5	2
FRM2	2
WTM2	2
APC1	2
PAU11	2
FCY21	2
LDB19	2
CTK3	2
RRN10	2
DAL3	2
MF(ALPHA)2	2
VPS63	2
RIM9	2
FCF2	2
DBP10	2
SPC42	2
FAF1	2
HNM1	2
PGD1	2
PCD1	2
TDP1	2
MID1	2
SWE1	2
MPH3	2
REC102	2
SLZ1	2
TGL2	2
TUB4	2
ECM11	2
NUC1	2
BNA2	2
CCR4	2
AIR2	2
AAD16	2
HBS1	2
TMA23	2
YPK9	2
PLM2	2
BUD8	2
PAU2	2
NCB2	2
FLD1	2
CCM1	2
SRP40	2
FAR3	2
RIF1	2
MDE1	2
NDI1	2
BNR1	2
DAS2	2
POG1	2
FCP1	2
URB2	2
NBA1	2
MHF1	2
RSM18	2
BLS1	2
HSL7	2
URM1	2
MPP6	2
UPS2	2
DAN4	2
BCK2	2
MMS22	2
NUP42	2
ACO2	2
MTF2	2
PPR1	2
PUS4	2
GAL4	2
HBT1	2
ALR2	2
MRPL44	2
HMS2	2
ASH1	2
FAU1	2
KTR5	2
PLP1	2
COG3	2
MIF2	2
SHQ1	2
HLR1	2
RAD17	2
HMS1	2
SCC4	2
TIP20	2
ZIP1	2
RNH201	2
URC2	2
TPO1	2
STB1	2
MRPL50	2
MSG5	2
RRG8	2
SSF2	2
NOP15	2
UTP25	2
NPP2	2
RPS9A	2
SST2	2
DAL1	2
SPS4	2
TGS1	2
RPS8A	2
PDC5	2
GAS2	2
NAR1	2
USB1	2
UBP14	2
SHG1	2
PDH1	2
SYS1	2
MCM16	2
RRG1	2
CSR1	2
SPR1	2
TAF11	2
MPC54	2
RRP36	2
MOB2	2
GAL11	2
REX2	2
BUR2	2
DAD4	2
UBP8	2
TMA108	2
HEM3	2
NTG1	2
MCM4	2
ECM13	2
FUR4	2
THI2	2
AYT1	2
DHR2	2
SPT14	2
EST1	2
CSF1	2
MPS2	2
PIB2	2
PRM9	2
RAP1	2
IPL1	2
DBP1	2
PPM2	2
YPT6	2
SPC1	2
YPT53	2
JEM1	2
MND2	2
AFI1	2
REB1	2
TRM44	2
CUE2	2
KIP1	2
LOC1	2
CWC24	2
YIA6	2
SCS3	2
PFA4	2
YAT2	2
DBP6	2
CCZ1	2
VPS75	2
THI72	2
SLI1	2
ATF2	2
BMT2	2
CLB6	2
BBP1	2
EFM3	2
BAS1	2
SLD3	2
DCR2	2
GMC2	2
IRC8	2
RCE1	2
SPO23	2
PRY3	2
TRI1	2
FLO1	2
PMP1	2
RRN7	2
FLC3	2
YGK3	2
BUB1	2
MMP1	2
DFR1	2
RPC19	2
RPL41B	2
MEK1	2
CCH1	2
SIP18	2
FYV5	2
GND2	2
FAB1	2
AAD4	2
TRZ1	2
CHZ1	2
MNN9	2
DAD3	2
NMA2	2
RGS2	2
SWP82	2
RTC1	2
CAN1	2
BIO2	2
DSF1	2
AMF1	2
SNO2	2
ECM10	2
PRP24	2
KCH1	2
MUM3	2
YMC1	2
TFB2	2
RFC1	2
UBX2	2
BFR2	2
RME1	2
UTR2	2
NDJ1	2
TCA17	2
MCH2	2
ECM8	2
KAR1	2
SRB6	2
NPP1	2
HIT1	2
SPR3	2
RPL41A	2
SGD1	2
SWI5	2
OAZ1	2
VHT1	2
FZF1	2
PIR3	2
RFC4	2
SPO14	2
PUF3	2
BIK1	2
MET3	2
NCS6	2
NIT2	2
VPS65	2
RRT5	2
SWI4	2
EST2	2
SWC7	2
ATG10	2
TRS120	2
RLI1	2
UBA2	2
TSR1	2
GIN4	2
XYL2	2
RAD2	2
NNF2	2
NCS2	2
MBB1	2
NNF1	2
LAS1	2
HRT1	2
RLP24	2
GTR1	2
TYW1	2
FRE8	2
PDC6	2
SSY5	2
RAD28	2
PIF1	2
MKC7	2
WSC2	2
DUO1	2
CBK1	2
ERT1	2
GIP1	2
GIM4	2
YPS5	2
VPS64	2
RHO2	2
RUD3	2
CIK1	2
MLS1	2
COQ8	2
NRP1	2
RRN6	2
BUD27	2
HIF1	2
TIM12	2
TTI2	2
LOT5	2
RAD55	2
CYK3	2
DAK2	2
NUP100	2
EXO70	2
SNU66	2
ATG32	2
TEX1	2
SRN2	2
SMD3	2
SLI15	2
ADY3	2
OST6	2
FEX2	2
LCL1	2
SGF73	2
NUP57	2
LSM8	2
IME4	2
PDR18	2
MST28	2
DAL82	2
SSP2	2
ATP10	2
IMD1	2
TRM732	2
NPL3	2
AFB1	2
PDR12	2
PRM7	2
RIP1	2
MTO1	2
ASG7	2
SFC1	2
SEA4	2
HMI1	2
SUV3	2
CDC13	2
FHL1	2
PIG1	2
QRI7	2
SAM37	2
INP51	2
RAD54	2
TFC8	2
ARG5,6	2
QDR3	2
TIR4	2
LTO1	2
TRL1	2
RPC31	2
MSI1	2
SFG1	2
MTR3	2
AIM34	2
PHM6	2
TPO2	2
BUL1	2
SLD2	2
AME1	2
PHO80	2
TEM1	2
GRX8	2
FDH1	2
BIT2	2
NDE2	2
UAF30	2
HPC2	2
SWP1	2
MRS1	2
OPI8	2
LSB1	2
IES4	2
ACF2	2
PRP39	2
DBP7	2
DMA2	2
RRP8	2
HDA1	2
CBF2	2
AST1	2
CEF1	2
HOT1	2
HHY1	2
STE7	2
RAS1	2
FAA3	2
IRC19	2
PDS1	2
MAK3	2
ADH7	2
OSW5	2
CDC26	2
RTT105	2
SLO1	2
SYG1	2
BUD26	2
TBF1	2
RRT14	2
DON1	2
CSN9	2
SIP4	2
PRM1	2
FMT1	2
XBP1	2
SNM1	2
PSF1	2
FLX1	2
AQY1	2
SRL4	2
STU2	2
NTO1	2
VAM10	2
RRP14	2
DCG1	2
VPS51	2
VPS5	2
RAX1	2
RGT2	2
PET18	2
CNN1	2
DCV1	2
NAF1	2
INP1	2
MTW1	2
DBF4	2
PSR2	2
CAF4	2
STE3	2
REC114	2
PUT3	2
HER2	2
MET2	2
NCE101	2
DUR1,2	2
AIM26	2
BUD13	2
PGU1	2
IZH1	2
SIM1	2
PTP3	2
ACM1	2
CLB2	2
RTC4	2
NFI1	2
KDX1	2
SGO1	2
ATG16	2
ECO1	2
MCM10	2
NTC20	2
BAR1	2
CTR3	2
MRH4	2
RPC17	2
MCD4	2
YSR3	2
FLO9	2
GMC1	2
RTT10	2
FMP30	2
YPT11	2
CHS3	2
MPS3	2
MNN11	2
PTP1	2
ZPS1	2
SDH2	2
FHN1	2
GFD2	2
GTB1	2
SRL3	2
TOF1	2
SLX8	2
AMD2	2
CAC2	2
SLY1	2
SCY1	2
PET54	2
HTL1	2
GEX2	2
RRT13	2
CWC2	2
NAG1	2
SGF11	2
VFA1	2
SIR4	2
BSC1	2
PTR3	2
UBP10	2
CLB4	2
RRP17	2
RSA4	2
FIG2	2
PRP9	2
RSE1	2
KAP122	2
TDA7	2
THG1	2
OXP1	2
MET5	2
RTG1	2
GAS4	2
SPH1	2
PAU9	2
PIN2	2
PSY4	2
ENT4	2
HIR3	2
LEU9	2
TRF5	2
GDE1	2
RTS2	2
RSR1	2
BNI4	2
PPZ1	2
FZO1	2
FUN30	2
SPB1	2
PHO92	2
SWM1	2
VTS1	2
ANR2	2
CLB1	2
SNO4	2
DBF2	2
NRM1	2
ARG80	2
MCH5	2
DUG3	2
SAP185	2
GIC2	2
RKM1	2
SPP41	2
SPA2	2
ISC10	2
HAC1	2
ELO2	2
AAD3	2
CDC6	2
HOF1	2
ORC3	2
PCA1	2
TOS2	2
SPS18	2
FYV7	2
VAM3	2
SLF1	2
AIR1	2
PEX4	2
EFG1	2
RRT7	2
HOP2	2
JLP1	2
GLG2	2
ALG3	2
AXL2	2
SMC6	2
SMM1	2
PET20	2
CDC20	2
RPB10	2
LRG1	2
SAN1	2
ARG2	2
OPI7	2
SSM4	2
SRL1	2
CYB5	2
DRN1	2
HST3	2
RSA3	2
NEW1	2
FKH1	2
RPS8B	2
YKE2	2
DPH1	2
IMP4	2
SET4	2
KIN3	2
RIM15	2
CGR1	2
AGA1	2
SPO21	2
PAC11	2
TOR2	2
DCC1	2
SWI1	2
GUP2	2
SWT1	2
REI1	2
DIG2	2
SLX9	2
MRC1	2
UIP5	2
NMA111	2
ART5	2
HNT2	2
NAN1	2
DAT1	2
YEH1	2
TDA6	2
SET6	2
CDC21	2
CRH1	2
MAE1	2
MTR4	2
UTR5	2
JJJ3	2
BUD6	2
PRY2	2
HXT8	2
PAP2	2
POL32	2
IDP2	2
SAK1	2
RTA1	2
RPS28B	2
PAU17	2
OAR1	2
SNA4	2
DGR1	2
RAD27	2
CSM3	2
AUS1	2
MSH6	2
SPT21	2
MAK16	2
LTE1	2
HFA1	2
MAM3	2
TRS85	2
TOS4	2
SWF1	2
DIA3	2
PRM3	2
DUS1	2
RNR1	2
DPH2	2
PET117	2
CLN3	2
TAF7	2
PRP45	2
ADE4	2
HOS1	2
POL12	2
BIO4	2
MEI4	2
FUS2	2
FIR1	2
PZF1	2
TOP1	2
BUD22	2
RPR2	2
UTP15	2
TOS6	2
MDJ2	2
HUG1	2
FIT3	2
SUM1	2
FAR1	2
RMD6	2
COS4	2
SPE4	2
POL3	2
DIN7	2
ERD1	2
SAG1	2
FOB1	2
FRK1	2
SLD5	2
EPL1	2
RNR3	2
YAT1	2
RAD53	2
NCA3	2
BIO3	2
LSO1	2
POL4	2
RPH1	2
THI13	2
ULI1	2
SEN34	2
TIP1	2
DAN1	2
DDR48	2
GAL1	2
PCL9	2
PST1	2
PIR1	2
AIM44	2
EGT2	2
NIS1	2
CIS3	2
HTA1	2
HTB1	2
HHF2	2
HTA2	2
HTB2	2
HHO1	2
SSB1	2
SSE1	2
HSP42	2
HSP30	2
FIT2	2
ADH1	2
CDC19	2
SSA2	2
ICY2	2
HSP78	2
ZPR1	2
PIN3	2
SSA4	2
SSA1	2
HSP104	2
HSP82	2
HSP26	2
RPL25	4
RPL10	4
RPP2B	4
RPL38	4
RPL21A	4
RPL9A	4
RPL22A	4
RPL17A	4
RPS1A	4
RPL43B	4
RPL13B	4
ATG5	4
GPM1	4
FBA1	4
TDH2	4
TPI1	4
GDH1	4
MBF1	4
COX15	4
APJ1	4
SIS1	4
CPR6	4
STI1	4
YAR1	4
LST8	4
KAR2	4
HSC82	4
FES1	4
HHT2	4
HHF1	4
AHP1	4
DSE3	4
DSE1	4
DSE4	4
AMN1	4
COS12	4
GAL10	4
SNZ3	4
RRT1	4
MOH1	4
HEF3	4
VMA13	4
VMA4	4
KEG1	4
RPL4A	4
FPR1	4
VMA8	4
HEM4	4
RER1	4
PDP3	4
APS3	4
INP52	4
PEP7	4
ATP11	4
MIC12	4
XPT1	4
SWS2	4
CCA1	4
APC2	4
APC11	4
MCM6	4
YKE4	4
SNU56	4
KSS1	4
ELA1	4
2020-10-01	4
NUD1	4
SHE1	4
SUE1	4
ZRG17	4
IES5	4
STE18	4
CUS2	4
SSY1	4
BOS1	4
SIC1	4
GPI1	4
SNF8	4
VPS20	4
ABM1	4
CTF13	4
SWM2	4
RAD10	4
ARE1	4
LIP5	4
PAU3	4
TEL2	4
SHH4	4
SPO1	4
ARV1	4
TKL2	4
AAD10	4
CBF1	4
FMP33	4
RKM4	4
SPO73	4
DPP1	4
DPH6	4
ROG1	4
ICE2	4
MRS4	4
QDR1	4
INA22	4
NAT3	4
AVT5	4
DSC2	4
HRQ1	4
MTF1	4
GPI11	4
ACS1	4
ASF1	4
MUB1	4
ISU1	4
UPS1	4
ALR1	4
COG7	4
UBA3	4
MEC1	4
NGL1	4
DAD2	4
CNA1	4
ESL1	4
LYS1	4
ARG81	4
SHY1	4
MRPL1	4
BUD17	4
SEN15	4
ESP1	4
SSQ1	4
AVT6	4
RDS2	4
DAL5	4
FRE7	4
YCT1	4
AIM11	4
AMS1	4
QDR2	4
HOL1	4
NPR1	4
ITT1	4
RHO4	4
NDL1	4
PET191	4
AVT4	4
TMN3	4
YPS1	4
NUS1	4
POF1	4
APS1	4
CBT1	4
GUT2	4
MRN1	4
QCR9	4
THI73	4
SMD2	4
DPB11	4
ISA1	4
POT1	4
CYB2	4
SUN4	4
CMC2	4
HVG1	4
YEF1	4
MNE1	4
AKR1	4
MAL33	4
AVO1	4
MHF2	4
VAM7	4
THI11	4
RIF2	4
SSU1	4
SLY41	4
DPB3	4
PET122	4
DIE2	4
FAT1	4
MST1	4
PRR1	4
IRC15	4
MON1	4
HSH155	4
BPL1	4
PEX17	4
ZIM17	4
PEX15	4
HEM14	4
ERF2	4
FIN1	4
RSM25	4
DLD2	4
HUL5	4
TSC10	4
KAR9	4
ABZ1	4
CSI1	4
SOH1	4
RTR1	4
YML6	4
FEN2	4
PAU20	4
AAD6	4
MRPL7	4
FAR11	4
SFP1	4
TYW3	4
VCX1	4
YPS6	4
VPS25	4
PET130	4
PTR2	4
ATG33	4
RCF1	4
TIM22	4
DNF3	4
UBC8	4
YHC3	4
MIT1	4
NDE1	4
MBR1	4
NPC2	4
PET494	4
BEM4	4
BSC5	4
SAM50	4
MRPL16	4
YFT2	4
MTC2	4
RRN5	4
CBP1	4
PEX34	4
CRF1	4
MPO1	4
DSD1	4
PRP5	4
CMC1	4
ERP3	4
RAD33	4
KNH1	4
OPT2	4
RRT6	4
TFB4	4
STT4	4
MRPS35	4
THI6	4
BNS1	4
LDB18	4
YMR1	4
MFT1	4
PML1	4
NMD4	4
TDA2	4
SWT21	4
IST3	4
YAF9	4
PET100	4
PMT6	4
NAT2	4
SPO71	4
TRS65	4
PSF3	4
MET28	4
MRPL35	4
PUS5	4
CSE4	4
HSP31	4
LOT6	4
APC5	4
GRX4	4
TRP3	4
THI20	4
ADY4	4
SEC12	4
HAP3	4
MLH1	4
DOC1	4
MCK1	4
MKK2	4
ALP1	4
KSH1	4
CDC43	4
NSE4	4
SPC98	4
SET3	4
CTL1	4
HPA3	4
RMD1	4
DBF20	4
MEF2	4
EAR1	4
CDC40	4
OTU1	4
ROG3	4
BUD16	4
MSS1	4
YRO2	4
AAD15	4
CBS2	4
MRH1	4
ZAP1	4
RGD2	4
LYP1	4
UBP16	4
LAC1	4
ATG12	4
CDD1	4
RRI1	4
DLS1	4
RHB1	4
MDV1	4
STB6	4
SNX3	4
SYC1	4
MSS18	4
SGN1	4
MSH3	4
TAM41	4
MDM34	4
YVC1	4
ABZ2	4
ARH1	4
FAT3	4
SPP382	4
DAL2	4
GTO1	4
RSM27	4
YFH7	4
GYP8	4
RER2	4
PAL1	4
HIS2	4
NDC80	4
KEI1	4
MTG1	4
PFK27	4
SDC1	4
DTD1	4
SPG5	4
MAL12	4
STR2	4
IRC21	4
SYF2	4
RNH1	4
LPX1	4
AEP1	4
SWD1	4
SEC59	4
NMD5	4
NTE1	4
ESBP6	4
GAA1	4
SRB5	4
ADD37	4
TEP1	4
BOR1	4
TIM18	4
SCP1	4
GSM1	4
COX11	4
SIA1	4
SIL1	4
SRL2	4
IPK1	4
SPS22	4
CDA1	4
PXL1	4
ADK2	4
IDS2	4
CTR86	4
ACO1	4
MCH4	4
TLG2	4
AGX1	4
VPS3	4
FPS1	4
MYO4	4
HPR1	4
GLT1	4
DSN1	4
PRI1	4
SIS2	4
AVO2	4
CBS1	4
PEP5	4
DML1	4
HOC1	4
PEX31	4
GPM3	4
AIM4	4
GRX7	4
CPD1	4
SNN1	4
RPI1	4
SDT1	4
SUT1	4
ALG12	4
SPO22	4
BUB2	4
ARO80	4
RIC1	4
NFT1	4
TMA16	4
PRM10	4
TOK1	4
MET22	4
HOS3	4
THI74	4
YSP2	4
TPP1	4
PDR15	4
RTC5	4
PBI2	4
PSO2	4
GAL7	4
DAL4	4
MPA43	4
LEU1	4
SEN2	4
IRA2	4
ARL3	4
URH1	4
MUD2	4
SVS1	4
RHO3	4
ORC5	4
MIX23	4
OKP1	4
MFM1	4
CLB5	4
HMT1	4
KEX2	4
RDS3	4
TGL1	4
SNT309	4
ASI1	4
CPR7	4
FMC1	4
BEM1	4
LRO1	4
MMT1	4
NUF2	4
PCL10	4
SLM4	4
RMR1	4
GYP1	4
SHC1	4
PRP16	4
TPO3	4
RAV1	4
FYV8	4
ASI3	4
SDS23	4
REG1	4
EHD3	4
JAC1	4
CLD1	4
RTG3	4
PAC2	4
PDR17	4
XRS2	4
FRT1	4
YCK3	4
THI12	4
HAP5	4
MRPS9	4
DPB2	4
RIB7	4
MSA2	4
IME1	4
MUM2	4
APN1	4
KAR5	4
YCH1	4
RGR1	4
IRC3	4
MCM7	4
MAM33	4
INP2	4
ARF3	4
PAU23	4
ANB1	4
COA2	4
CMR1	4
DFG5	4
SKS1	4
REF2	4
ATX2	4
CAT5	4
SMF1	4
SCM3	4
SPC105	4
BST1	4
PFF1	4
UPS3	4
RAD61	4
SGV1	4
HAL1	4
POP7	4
GPI2	4
DCP1	4
IRR1	4
COG1	4
EST3	4
SSH4	4
CYC2	4
YEN1	4
DIT1	4
MFA1	4
TOM7	4
MAL32	4
DAL7	4
RIT1	4
SMP1	4
MAC1	4
EDC1	4
IML1	4
SRO7	4
PSP2	4
ATG38	4
PRP21	4
GTT2	4
RFT1	4
HRD3	4
MRPL39	4
YOR1	4
SOV1	4
POP4	4
MSY1	4
RRT15	4
LIP2	4
RSP5	4
MLH2	4
CAT2	4
MZM1	4
CDC4	4
CRC1	4
VPS61	4
VBA2	4
CTK1	4
POS5	4
ATP12	4
SKI7	4
PRP38	4
CHL1	4
HSK3	4
SRT1	4
CSM4	4
IMO32	4
GDH3	4
SPG1	4
DFM1	4
ATG22	4
SCD5	4
SHR5	4
CRS5	4
UTP22	4
ARR3	4
MRPL20	4
MDM36	4
PAU15	4
MRL1	4
PMT7	4
SEC1	4
PUT4	4
MED11	4
EDS1	4
IRC18	4
ECM2	4
VPS8	4
POP2	4
PET112	4
GUD1	4
MSB3	4
CAF130	4
RTT101	4
TCM62	4
YFH1	4
GCV1	4
MRPS8	4
OPY1	4
TAZ1	4
PPH22	4
HNT3	4
MSH5	4
AAD14	4
ATP19	4
AIM1	4
SEG2	4
HOP1	4
TRS130	4
MNN4	4
PTC5	4
NUP157	4
GPI10	4
RMD8	4
SMD1	4
PMP2	4
ATG11	4
PAU5	4
ASR1	4
JJJ2	4
UBP7	4
CKI1	4
ECM18	4
COY1	4
RAD14	4
PUF2	4
YSF3	4
RAD24	4
TAF1	4
MET6	4
SPR28	4
THI4	4
GCN3	4
ATG17	4
GLN3	4
JNM1	4
THI22	4
VPS52	4
AGC1	4
COX26	4
BAG7	4
ELM1	4
CIR2	4
VPS30	4
MEF1	4
SUS1	4
ATP23	4
[truncated: 31 more rows]

## Sheet: inlag3h_coexp_clusters
gene_name	cluster
RPS17A	3
RPL38	3
RPL19B	3
RPS21B	3
RPL27B	3
RPL26A	3
RPL40B	3
RPL6A	3
GSP1	3
RPS26A	3
RPL35A	3
RPL36A	3
RPL31A	3
RPS14A	3
RPS3	3
RPS14B	3
RPS6B	3
RPS4A	3
RPL13A	3
RPL33A	3
RPL16A	3
RPS23A	3
RPL11B	3
RPL12B	3
RPL19A	3
EFB1	3
RPL31B	3
RPS0A	3
RPL37B	3
CIS3	3
RPS6A	3
SNU13	3
IMD4	3
RPS28A	3
RPL21A	3
RPL7A	3
RPS23B	3
RPS30A	3
RPL16B	3
RPS15	3
RPL40A	3
RPS16A	3
RPS10B	3
RPP0	3
RPP2B	3
RPL17A	3
RPL18A	3
RPS11A	3
RPL13B	3
RPS18B	3
RPS24A	3
TMA19	3
RPS25B	3
RPL17B	3
RPL37A	3
RPS5	3
RPS17B	3
RPL9A	3
RPS13	3
RPL34A	3
RPL12A	3
CDC19	3
TDH3	3
RPL3	3
RPS19B	3
GPM1	3
RPL25	3
RPL36B	3
RPS11B	3
RPL14A	3
RPL23B	3
RPL26B	3
RPL42A	3
RPS9B	3
RPL21B	3
RPP2A	3
RPL24A	3
RPL23A	3
RPL5	3
RPL11A	3
RPS19A	3
RPS7A	3
RPL24B	3
RPS1B	3
RPS16B	3
RPL8B	3
RPS24B	3
RPL29	3
RPL20A	3
RPS18A	3
RPS21A	3
RPS22A	3
RPS26B	3
RPS12	3
RPS31	3
RPL28	3
RPS2	3
RPL34B	3
RPL43A	3
RPL20B	3
RPS29B	3
RPS10A	3
RPL32	3
RPL30	3
RPL15A	3
GSY1	1
PHO8	1
TPS3	1
MOT3	1
SSE1	1
CPR6	1
KAR2	1
TKL1	1
MED1	1
CLF1	1
CHA1	1
HSP26	1
HSP82	1
DBF2	1
TIM18	1
SEC59	1
FLD1	1
MNT3	1
PFK2	1
OTU1	1
ASG1	1
SWC4	1
RCE1	1
AGC1	1
MSC6	1
MTG1	1
SSY5	1
SAS4	1
RFC4	1
GWT1	1
MFM1	1
QRI1	1
JHD1	1
MSH5	1
TYW3	1
CLB3	1
COS9	1
ALG7	1
PCD1	1
PML1	1
MUD1	1
CLB5	1
TRI1	1
PRP45	1
ENT5	1
RER2	1
TOS3	1
MLH2	1
RRP45	1
CAF4	1
SWI1	1
ANP1	1
SMX2	1
HNT2	1
RDR1	1
KTR5	1
WSC2	1
CDC21	1
PEX4	1
RAD3	1
PRT1	1
CFD1	1
SPT5	1
SKI6	1
SIS1	1
RPH1	1
ENV11	1
IRC23	1
MRPL4	1
AME1	1
HAP3	1
JHD2	1
GAS4	1
CNA1	1
VPS64	1
SKS1	1
RTT102	1
SHG1	1
CIA1	1
SSH4	1
PPT2	1
RAS1	1
ICL1	1
TEL2	1
MET16	1
SAC7	1
VPS52	1
TAZ1	1
POS5	1
SGN1	1
KAR5	1
MRS2	1
EXO70	1
BUD8	1
ESC8	1
SPS4	1
BIO2	1
SEC39	1
MET1	1
CAB4	1
TRS20	1
DFG5	1
MCM21	1
SPO23	1
SAM2	1
VHT1	1
CET1	1
KNH1	1
ADY4	1
GAS3	1
TRK1	1
HBS1	1
URN1	1
MED7	1
LSO2	1
BLS1	1
PHO5	1
INP1	1
FCF1	1
SWD3	1
EST1	1
DAL5	1
SPC72	1
INP52	1
CHS6	1
SRO7	1
URA6	1
CIT3	1
MET17	1
MHT1	1
TPS1	1
ICP55	1
PET20	1
RTN2	1
RME1	1
MAL32	1
SFC1	1
SIC1	1
DAD4	1
PES4	1
MET32	1
ATO3	1
CYC1	1
AGA2	1
ECM13	1
FAS1	1
AHA1	1
AQY1	1
NRG2	1
ERG5	1
SMT3	1
BCP1	1
FAR7	1
OPI11	1
PMP1	1
HSK3	1
CIN2	1
SCY1	1
BUD17	1
JJJ3	1
FRS2	1
BSC6	1
MCD4	1
RFA2	1
KAR4	1
SRT1	1
MOB2	1
PDR3	1
TAH1	1
PBY1	1
SGO1	1
MRP10	1
NFI1	1
GIM4	1
SUS1	1
POG1	1
PDR11	1
PHA2	1
APS3	1
PCL2	1
PRP31	1
SYC1	1
DCR2	1
PMT3	1
VPS9	1
ACK1	1
HER2	1
FMP30	1
POP4	1
JLP1	1
LSM7	1
ARP8	1
SMD2	1
MPS2	1
RPL41A	1
ORC5	1
FUS3	1
CSM1	1
RRT2	1
SIM1	1
RUD3	1
ZAP1	1
SOV1	1
PUS9	1
KSH1	1
MAC1	1
CIN5	1
PIP2	1
YCK3	1
RAD28	1
SIZ1	1
ATG13	1
HPA2	1
TEM1	1
UGA4	1
PEP5	1
SLM3	1
BDP1	1
VFA1	1
RDS1	1
OKP1	1
DAL7	1
PRP21	1
YBP2	1
PRP19	1
MMR1	1
SNO4	1
MET13	1
SNA4	1
DDC1	1
MED11	1
TFC6	1
KHA1	1
MKT1	1
MEC3	1
SFH1	1
PAP2	1
SVS1	1
PRM5	1
FAT3	1
SSA2	1
HAC1	1
GEA2	1
DMA2	1
YEH1	1
PHO90	1
GCD6	1
EST2	1
SPB1	1
BUD26	1
PAU24	1
DCC1	1
SWF1	1
VPS75	1
RRG7	1
PXR1	1
BUB2	1
MMS1	1
COS4	1
IMA5	1
RSC1	1
STE18	1
SLS1	1
MRPL24	1
MSE1	1
MFT1	1
ERT1	1
JLP2	1
MSH6	1
RAD61	1
BUL2	1
THI21	1
ATG32	1
SUV3	1
PIR3	1
KRE33	1
AAD16	1
HEK2	1
ALA1	1
AGA1	1
DSN1	1
UME6	1
LHS1	1
MCH2	1
NTR2	1
SRX1	1
CDC45	1
BUD25	1
DUG3	1
SMD3	1
SRB7	1
PRI1	1
ORC3	1
FLX1	1
SRD1	1
SNF3	1
ZIP1	1
AVT2	1
ORC1	1
SYG1	1
HOT13	1
YEL1	1
COX10	1
ALK1	1
CTR86	1
JJJ2	1
RRT7	1
SWC5	1
MIS1	1
STR3	1
DPH6	1
BNI5	1
KAP114	1
MMT1	1
SHE1	1
VIK1	1
GIC2	1
SPC29	1
FRE8	1
CAK1	1
SKN1	1
ISY1	1
NUP100	1
THI2	1
NPR2	1
ADH4	1
YGK3	1
GDT1	1
HOT1	1
YJU2	1
HIF1	1
RKM4	1
ULI1	1
HIM1	1
EDS1	1
PLP1	1
SAS5	1
HOP2	1
HTL1	1
SPO21	1
EAF5	1
KRE6	1
LSM8	1
IES4	1
SEM1	1
AFI1	1
RAD33	1
RKR1	1
GUP1	1
TRL1	1
MET2	1
NRT1	1
FSF1	1
ATG10	1
PAU2	1
SNU56	1
FYV6	1
MRH4	1
AYT1	1
TUB4	1
POP8	1
YLH47	1
PAC11	1
GLN3	1
NUP42	1
NCS6	1
RTT106	1
YSW1	1
YRO2	1
YPT6	1
CLN1	1
SIR4	1
GPN3	1
TAT1	1
TPM2	1
DCG1	1
MSL1	1
RPI1	1
PDC6	1
HEM3	1
HMI1	1
MAK31	1
TPO1	1
GYL1	1
BIO3	1
SNU66	1
RAX1	1
OPI8	1
KIP2	1
TIF4631	1
AMN1	1
CTS1	1
SUN4	1
DSE1	1
DSE3	1
DSE4	1
NIS1	1
ISR1	1
PSA1	1
HPF1	1
ALD4	1
FIT2	1
HXT7	1
SPO24	1
ALD6	1
MAL63	1
HSP42	1
PIN3	1
RGI1	1
PUT1	1
PHM6	1
YPS5	1
LDS1	1
MSH3	1
ERR3	1
AAD3	1
MPH2	1
MPH3	1
PHO89	1
PHO84	1
PUN1	1
HXT3	1
SSA4	1
ADH1	1
ENO1	1
TDH1	1
HXT6	1
HXK1	1
HHF1	1
HHT2	1
HHF2	1
HTA2	1
HTB1	1
HTA1	1
HTB2	1
TPI1	1
PDC1	1
TDH2	1
FBA1	1
RPS25A	1
RPL10	1
RPP1B	1
ASC1	1
RPL22A	1
RPS1A	1
CSL4	1
ZDS2	1
RPA43	1
RTP1	1
MRD1	1
DBP9	1
PLM2	1
HUG1	1
DUS1	1
YMC2	1
RPA190	1
RRG8	1
ARG3	1
EXG1	1
RKI1	1
DIT1	1
PMT5	1
PUF6	1
MCM3	1
TOS6	1
AIM20	1
RAD2	1
KSS1	1
TRM10	1
SWT21	1
TOS4	1
SPR2	1
RIX7	1
GUP2	1
OPT1	1
TRM44	1
CIK1	1
TEP1	1
ACO2	1
RPC53	1
NOC4	1
PZF1	1
UTP18	1
NOG1	1
OSW1	1
RTC4	1
MCM1	1
PGU1	1
VAC17	1
OSW2	1
OPI9	1
PHO92	1
UTP30	1
POL5	1
ATC1	1
RSA4	1
REX4	1
MTR3	1
RLP7	1
MUM3	1
KAP122	1
RRN11	1
RPA12	1
RAX2	1
PWP1	1
FLC3	1
HXT9	1
AMF1	1
MRT4	1
UTP23	1
RAD9	1
SMM1	1
NOP12	1
NKP2	1
COS3	1
PUS7	1
PIF1	1
URK1	1
IZH1	1
PAU7	1
FDH1	1
MTO1	1
APT1	1
BMT5	1
KDX1	1
PEX31	1
HMS1	1
ROK1	1
YTM1	1
INO2	1
AAC3	1
RPL22B	1
RNT1	1
UTP6	1
RMT2	1
HFA1	1
CCH1	1
MKC7	1
SCC2	1
NOP8	1
PPM2	1
YPS1	1
FMT1	1
PDR18	1
FCY21	1
SPC110	1
THI72	1
BMT2	1
RTT10	1
STL1	1
BBP1	1
PAU3	1
TSR2	1
CMR1	1
SNP1	1
TGS1	1
DUO1	1
RET1	1
DIM1	1
RLI1	1
ESF1	1
YKE2	1
MAK5	1
LSB1	1
DAK2	1
OGG1	1
RMD6	1
MAK16	1
PCL1	1
ESF2	1
ATP10	1
NOP7	1
RPC31	1
PWP2	1
TTI1	1
TSR1	1
DHR2	1
AIM26	1
KIN4	1
RBG1	1
NOP58	1
RCM1	1
ALB1	1
RPL35B	1
ECM1	1
BMS1	1
YIH1	1
UTP11	1
CAC2	1
TEF1	1
RRP5	1
RPC34	1
NOP6	1
RPA49	1
TYE7	1
NUG1	1
INA1	1
MPP10	1
URB1	1
PRP43	1
RRB1	1
ZPR1	1
CGR1	1
YVH1	1
SOK2	1
KIN3	1
DAN1	1
FAF1	1
IMP4	1
DPH1	1
GFD2	1
FAL1	1
COS12	1
TMA23	1
AZR1	1
NOG2	1
UTP21	1
NAN1	1
DBP3	1
UTP5	1
LEU9	1
SYO1	1
LTV1	1
ELP2	1
NEW1	1
HO	1
MND1	1
SRO9	1
RRG1	1
BFA1	1
RBG2	1
IPI3	1
NOP14	1
COS10	1
VTH2	1
DRS1	1
DUS4	1
NCA3	1
RRP36	1
SEC12	1
PET309	1
FOB1	1
PGA1	1
DIT2	1
MF(ALPHA)2	1
NOB1	1
SLF1	1
PUS1	1
ARE1	1
DCP1	1
MPA43	1
YAE1	1
TAT2	1
VHR2	1
KRI1	1
RRP8	1
FAA3	1
ALP1	1
HED1	1
ATG16	1
SQS1	1
BUD16	1
RSC6	1
TSR4	1
RNH70	1
ABF1	1
TAH11	1
CTF4	1
SIL1	1
SMK1	1
FUS2	1
ARR3	1
UTR5	1
HMLALPHA2	1
CLN3	1
PRP9	1
HLR1	1
IRC3	1
RNH201	1
LST7	1
MGA1	1
DAD3	1
FLO10	1
PDC5	1
MNL2	1
CTR3	1
SSQ1	1
BSC2	1
BSC5	1
HDA3	1
RKM1	1
IKI3	1
BIT61	1
ETT1	1
IRC8	1
ALG3	1
POP6	1
AGP3	1
NNF2	1
DXO1	1
HPM1	1
FAR3	1
PRP24	1
GAL2	1
CSM3	1
RPS28B	1
HAP5	1
SCS3	1
DIG2	1
DRN1	1
PPT1	1
PAD1	1
FCF2	1
PRS4	1
ACA1	1
HXT11	1
IST3	1
GPM3	1
PAU20	1
PUG1	1
MPC54	1
KEL3	1
HEM13	1
PSP2	1
AFT2	1
SMD1	1
MSH4	1
RTR2	1
SPS18	1
PAU10	1
MND2	1
ZRG17	1
SLX4	1
PRP18	1
TPO2	1
BUD31	1
ELA1	1
EMP65	1
CWC2	1
MSB1	1
SLX9	1
2020-10-01	1
RCL1	1
IRC4	1
CTF13	1
YPT53	1
MCH5	1
YPT11	1
TBF1	1
FZF1	1
BUD13	1
MHF2	1
COQ2	1
EKI1	1
NIP1	1
RTS2	1
SWM2	1
IRS4	1
CNS1	1
DUS3	1
EMW1	1
SUL1	1
CUS2	1
ALR2	1
SPR28	1
RRT6	1
SFL1	1
TGL5	1
MCM2	1
SPS22	1
UTR2	1
PPR1	1
PCA1	1
BNA2	1
RTR1	1
PRM2	1
UTP13	1
ELM1	1
MDM36	1
MCM16	1
GIT1	1
FUR4	1
RPB10	1
NAF1	1
PSY4	1
RRN6	1
PAU15	1
HHY1	1
ARP7	1
MDJ2	1
PAU16	1
FAP1	1
RPR2	1
FCY22	1
VBA5	1
HXT10	1
PMT4	1
HSL1	1
ASF1	1
IRR1	1
MSA2	1
GCN3	1
EBS1	1
TRM732	1
TDA7	1
POL1	1
ALK2	1
AAH1	1
DGR1	1
CST9	1
PRP3	1
IMD3	1
RIB7	1
RLF2	1
TAF7	1
NUP188	1
TSC10	1
MLS1	1
AXL2	1
FAR1	1
SUA5	1
IMO32	1
CHL1	1
BUD21	1
TPA1	1
POL12	1
FIT1	1
RIA1	1
RRN7	1
SPT14	1
NCL1	1
PAU4	1
VAM10	1
VTS1	1
STB1	1
CLB6	1
ABM1	1
BSC1	1
ARG1	1
SWI5	1
PTI1	1
MAK21	1
THI74	1
GMC1	1
GAL1	1
MCM10	1
DMC1	1
CHS2	1
UIP5	1
HOF1	1
UTP4	1
AAD15	1
RSA3	1
SAS10	1
HXT8	1
FEX1	1
BAR1	1
SLU7	1
SCW10	1
NOP15	1
RNH203	1
TRM7	1
SPO22	1
BIK1	1
TRM9	1
QRI7	1
MOD5	1
ALR1	1
NMA111	1
SKP2	1
TIR3	1
EFM2	1
UTP14	1
TRM8	1
TCD2	1
PMS1	1
EFG1	1
SLO1	1
SYF2	1
TMA16	1
RGM1	1
SST2	1
APL6	1
RMP1	1
ERB1	1
MMS21	1
PEF1	1
DAL4	1
YKU80	1
IME4	1
ACM1	1
SFT1	1
DAL2	1
RRP14	1
FYV5	1
BTS1	1
TDP1	1
SNM1	1
KCC4	1
NOP9	1
SNO1	1
GIP1	1
HUA2	1
HOP1	1
ADK2	1
BSC3	1
DIP2	1
SWP1	1
SAP185	1
IMD1	1
AAD6	1
COS5	1
IRC19	1
HSP33	1
RPS8A	1
RLP24	1
NAT4	1
PMP2	1
PEP7	1
MNN1	1
DTD1	1
RRP9	1
RPA135	1
NRM1	1
SPC24	1
GEA1	1
RRP15	1
SPB4	1
RPC82	1
ISM1	1
NAM2	1
TRM13	1
PXL1	1
UTP22	1
RRP17	1
LCP5	1
ACF4	1
ECO1	1
RPC17	1
PRY2	1
BIO4	1
COS2	1
CGI121	1
BOR1	1
CWC25	1
SNZ2	1
MIF2	1
TPK3	1
RKM2	1
PSF2	1
MCM6	1
UTP7	1
CLN2	1
TRF5	1
CWP2	1
CDC5	1
ASH1	1
SNZ3	1
SRN2	1
NPA3	1
PAU8	1
CDC13	1
TFC4	1
GAL4	1
RAD5	1
GIN4	1
CSI2	1
SHQ1	1
DIN7	1
RNR1	1
ENT4	1
FLO11	1
SLI1	1
GRC3	1
BUD4	1
BUB1	1
CDC40	1
NUP192	1
SRO77	1
RRN10	1
CTF19	1
HCM1	1
IZH4	1
FEX2	1
VPS61	1
RAD53	1
BAS1	1
TAD2	1
SPR3	1
RPC19	1
ATG29	1
SPR1	1
PDS5	1
ARP10	1
PFD1	1
LAS1	1
REV1	1
SMP3	1
PMD1	1
SWT1	1
DIS3	1
YIA6	1
SLX8	1
KTI11	1
TAM41	1
JJJ1	1
MCD1	1
RSR1	1
AIR1	1
BIL1	1
NCS2	1
SHO1	1
SPT21	1
NOP13	1
IBD2	1
RPC25	1
ATG12	1
GPI18	1
MGS1	1
GRX8	1
NOP2	1
DDR48	1
DBP7	1
HMS2	1
ECM16	1
FKH2	1
DBP10	1
PAU19	1
UAF30	1
DOC1	1
CDC6	1
KIP1	1
KRR1	1
JEM1	1
MST27	1
SMP1	1
YAP7	1
FKH1	1
RMA1	1
NMA2	1
ARG2	1
CWP1	1
UBA3	1
KAR1	1
HOM3	1
RIM15	1
FKS3	1
RPO31	1
AAT1	1
RBA50	1
REC114	1
SCW11	1
AST1	1
CYC8	1
TRM3	1
MEI4	1
PET122	1
CDC20	1
FRM2	1
POL32	1
RTA1	1
RIF1	1
MSB2	1
MAM1	1
KRS1	1
PRP16	1
PET111	1
HMT1	1
THI73	1
RIF2	1
FUS1	1
OPT2	1
ELP6	1
UTP15	1
TAD3	1
SGD1	1
NOP19	1
IRC2	1
NUP53	1
MET5	1
POL2	1
TOD6	1
UBC11	1
BFR2	1
POP3	1
MTR4	1
FYV7	1
SPP381	1
RPS9A	1
SWM1	1
GDA1	1
PRY3	1
NOP16	1
PMA2	1
GPI19	1
USA1	1
DPB2	1
RHB1	1
KAP123	1
PRM1	1
YCS4	1
DFR1	1
BUD28	1
PRO1	1
SRL1	1
YHP1	1
NIT1	1
UTP8	1
EFM4	1
AAR2	1
PUS4	1
DAD2	1
GEM1	1
MET8	1
UTP10	1
ELG1	1
RPS8B	1
FLO8	1
LSO1	1
FBP1	1
TRM11	1
SOF1	1
SEA4	1
UBP8	1
SET6	1
SIR2	1
TRM2	1
VTH1	1
COS7	1
RRP1	1
CSM2	1
REI1	1
SWE1	1
SPA2	1
ELP4	1
CNE1	1
JIP3	1
LSG1	1
FPR4	1
HST4	1
BUD22	1
MCM5	1
SEO1	1
PUS2	1
RNR3	1
CBF2	1
GLY1	1
BUD23	1
SGF11	1
PRP38	1
SAM1	1
PRM9	1
NOC2	1
TRZ1	1
DAT1	1
ATG15	1
TEA1	1
ATM1	1
PHO3	1
NAG1	1
YOX1	1
BUD27	1
RGS2	1
EFM3	1
TMN2	1
URM1	1
RRP12	1
NSE4	1
NUC1	1
RIM2	1
NOC3	1
PAC2	1
RCK1	1
SNF8	1
PSY1	1
TOS2	1
SAS2	1
DAL1	1
HKR1	1
CWC24	1
SPS1	1
SSK2	1
CLB1	1
RRT14	1
URB2	1
MPS3	1
PLB2	1
IFH1	1
TOP3	1
SET4	1
ORC2	1
WHI5	1
COX19	1
SUL2	1
MGR1	1
COG1	1
RIM9	1
BIO5	1
TRM1	1
MPP6	1
SLI15	1
TSR3	1
TIR4	1
PRP2	1
SSP2	1
PAU9	1
DEG1	1
SFG1	1
TOF1	1
RAD10	1
VPS69	1
BNR1	1
BUD9	1
ARX1	1
ATF2	1
EBP2	1
CSN9	1
DBP6	1
KCH1	1
RRT5	1
HDA1	1
BTT1	1
ENP1	1
HGH1	1
APC1	1
IRC13	1
CLB2	1
MCX1	1
GCD14	1
CUP2	1
PAU17	1
OAR1	1
SPO20	1
MKK2	1
HSH49	1
LTO1	1
DAL80	1
MCM7	1
JNM1	1
RAD55	1
AUA1	1
ADH7	1
REC102	1
ECM33	1
BNA4	1
CDC123	1
MUD2	1
GEX2	1
YIM2	1
DTR1	1
RNH202	1
ALF1	1
SCM3	1
RCO1	1
ECM18	1
RRT12	1
AUS1	1
CLB4	1
GAS2	1
OAZ1	1
SPE2	1
SQT1	1
RTT105	1
RIM8	1
SEN2	1
PDS1	1
AVO1	1
LDS2	1
MIG1	1
DED1	1
YEA6	1
JSN1	1
VHS1	1
PFK27	1
COS111	1
HSP30	1
ADA2	1
DML1	1
OXP1	1
BLI1	1
CHS3	1
GMC2	1
GAT3	1
NNF1	1
SEF1	1
NSI1	1
SRL2	1
PAC1	1
EMP70	1
CDC9	1
IPL1	1
DSF1	1
ESC2	1
HIR1	1
NUD1	1
CAF120	1
VPS65	1
ECM23	1
UPC2	1
CUL3	1
ENA5	1
HOS1	1
TAH18	1
USB1	1
UPF3	1
AEP3	1
GAC1	1
RIM13	1
RTG1	1
RIB2	1
NBP1	1
NOP53	1
PTR3	1
ASG7	1
TRS85	1
YPQ2	1
RGT2	1
CNN1	1
MRH1	1
LOH1	1
FIR1	1
SSK22	1
REC8	1
CIN8	1
BUD5	1
SLZ1	1
ARG81	1
FEN2	1
NGL3	1
IRC10	1
YPS3	1
CTF3	1
IRC7	1
PFF1	1
IMP1	1
GEP5	1
RAD24	1
CCR4	1
LAS21	1
MTW1	1
FUN30	1
AMA1	1
OPI6	1
SMC6	1
MEK1	1
ART5	1
PAU11	1
SRL4	1
VBA3	1
GAT4	1
LOC1	1
AFG2	1
ARR2	1
LYS4	1
CEP3	1
NPL3	1
HXT15	1
UTP25	1
RSB1	1
ELP3	1
MDN1	1
ANB1	1
BRN1	1
PDR12	1
SPO75	1
CDA1	1
ECM8	1
PRM7	1
HXT13	1
HSP150	1
PCL9	1
EGT2	1
AIM44	1
PIR1	1
PST1	1
CRH1	1
NOP4	1
BMT6	1
STE3	1
ERG25	1
ERG3	1
PBI1	1
TIR1	1
TMA10	2
HSP12	2
RGI2	2
MRP8	2
YOP1	2
WTM1	2
ATP7	2
SDH3	2
QCR8	2
HOR7	2
HHT1	2
MMF1	2
HOM6	2
RDL1	2
FPR1	2
CMD1	2
COX13	2
HNT1	2
MIC27	2
ACP1	2
PFY1	2
PRX1	2
GTT1	2
GSP2	2
MDH3	2
YNK1	2
ARA1	2
OPI3	2
GCV3	2
GCN4	2
MTC7	2
HYP2	2
RFS1	2
VMA3	2
GRX2	2
SNA2	2
YPC1	2
HFD1	2
PIL1	2
YCP4	2
YMR31	2
TVP15	2
PMP3	2
TMA17	2
SNA3	2
RRT8	2
TDA10	2
ATG36	2
NYV1	2
COX5B	2
GRE2	2
RPN8	2
YET3	2
TAL1	2
YPT1	2
TSA1	2
PDX3	2
SAR1	2
COF1	2
PRE9	2
COQ5	2
MRPL36	2
HMO1	2
VPS68	2
SEC17	2
MIC26	2
DCS1	2
BMH1	2
GLO1	2
QCR7	2
HYR1	2
GCY1	2
MHO1	2
ATP3	2
INH1	2
ATP5	2
HSP10	2
ATP18	2
COX7	2
ATP4	2
ATP16	2
QCR2	2
LPD1	2
COX9	2
COX12	2
COX4	2
RNR4	2
SDH6	2
ACT1	2
CIT2	2
GLN1	2
ERG28	2
SFT2	2
ABF2	2
ITR1	2
SOL4	2
GPG1	2
MPO1	2
URA10	2
COX26	2
MXR2	2
ERG1	2
SHH4	2
FMP16	2
TFS1	2
GRX1	2
SOD1	2
SNC1	2
CAM1	2
AYR1	2
MIX14	2
PUP2	2
TRX2	2
VMA2	2
MTH1	2
ATP2	2
VMA11	2
AIM19	2
ARF2	2
YPR1	2
MRPL23	2
MTD1	2
POT1	2
ISA1	2
ARC19	2
YPT52	2
RNR2	2
ADH3	2
PRE3	2
TIM11	2
ATP20	2
LSC2	2
ATP15	2
ACO1	2
STF1	2
MGR2	2
MIC12	2
ADE12	2
ERG20	2
QRI5	2
SDH4	2
MOG1	2
CYT1	2
AIM41	2
UBC1	2
FMP33	2
SNF4	2
DAK1	2
RVS167	2
VMA5	2
LAT1	2
BNA6	2
LAP3	2
LSC1	2
PUP3	2
UBX6	2
CIR1	2
SDH7	2
UBC8	2
AVT6	2
GVP36	2
FUN14	2
ADE13	2
ECI1	2
PST2	2
OM14	2
SPS19	2
CTA1	2
CHO1	2
PDA1	2
GAP1	2
NQM1	2
MCR1	2
MPC3	2
NCE103	2
POR1	2
CIT1	2
PFK26	2
MDH1	2
EDC2	2
SPG4	2
GCV1	2
YFH1	2
ATG33	2
PEP4	2
DDR2	2
STF2	2
YET1	2
VPS55	2
PRC1	2
BDH1	2
MSC1	2
PET10	2
BMH2	2
RPN12	2
LSP1	2
NCE102	2
CCW12	2
BGL2	2
ATP17	2
CPR5	2
SEC4	2
SSP120	2
GRX7	2
PRB1	2
GLC7	2
YDC1	2
YTP1	2
HSP31	2
POM33	2
HRT3	2
VTI1	2
RSM10	2
VMA8	2
GLO2	2
IRC24	2
RIM1	2
YPT7	2
MGE1	2
COX8	2
SOL2	2
RIB5	2
CLC1	2
ETR1	2
DUG1	2
MHF1	2
PRO3	2
COA1	2
PGC1	2
APE2	2
DIP5	2
NHX1	2
ELO1	2
SHR3	2
SBA1	2
KGD2	2
AIM6	2
MRPS9	2
CDC42	2
GRX5	2
PDB1	2
UPS1	2
SCS7	2
GLR1	2
MMS2	2
SDS22	2
DSC2	2
CAP1	2
NTH2	2
PNC1	2
SCL1	2
YIM1	2
ECM4	2
OSW5	2
INA17	2
ATG34	2
SDH8	2
CCC1	2
STE24	2
LDH1	2
CDC36	2
APD1	2
COS1	2
VMA4	2
SDH5	2
GPX1	2
UBC7	2
ATG19	2
FMP46	2
OXR1	2
COA2	2
COQ9	2
VMA6	2
ARC40	2
PNS1	2
ODC2	2
SNX3	2
UGX2	2
COA3	2
RPB4	2
KEI1	2
MAL33	2
CPT1	2
BNS1	2
SMF3	2
MPD2	2
ULA1	2
VAC8	2
PGK1	2
POF1	2
RRT13	2
TRR1	2
ITT1	2
VBA2	2
XYL2	2
CTR1	2
YBP1	2
FMP45	2
TFA2	2
DIF1	2
ARO10	2
ATO2	2
RAV2	2
CTT1	2
BDH2	2
TMC1	2
UIP4	2
YJU3	2
FUN19	2
PDI1	2
VPS21	2
MIA40	2
ERP2	2
GCG1	2
SLM4	2
VPH2	2
PAA1	2
PRE6	2
SHE10	2
TAN1	2
ABD1	2
YPK1	2
DSD1	2
PRR2	2
MSP1	2
TPS2	2
CBP3	2
USV1	2
PDR8	2
COQ6	2
DYN3	2
YTH1	2
OPY1	2
TLG1	2
MRP21	2
RPN7	2
MDM32	2
RTC5	2
UBX3	2
VAN1	2
SIP5	2
ERV41	2
GCD7	2
MRPL20	2
GET4	2
BEM1	2
HOG1	2
RPN11	2
DHH1	2
MRPL40	2
PBN1	2
APE3	2
MMT2	2
VAB2	2
RAM2	2
RNY1	2
VPH1	2
OPI10	2
COG5	2
MRPL17	2
NMD4	2
MRPL31	2
SHP1	2
UBP16	2
SRY1	2
FAU1	2
ATG14	2
POP7	2
ATR1	2
TIM17	2
NPL6	2
MFA1	2
GLC3	2
GSY2	2
PGM2	2
UGP1	2
ICY1	2
EMI2	2
APL1	2
CAR1	2
CYC7	2
SPI1	2
ACS1	2
ADH2	2
TIP1	2
SHM2	2
ADE17	2
GCV2	2
FAA2	2
SSU1	2
ADY2	2
YIG1	2
CAT2	2
POX1	2
FOX2	2
DLD1	2
HAP4	2
CYB2	2
CHO2	2
MET6	2
YGP1	2
HRP1	2
ZEO1	2
ADE1	2
TKL2	2
MXR1	2
HBT1	2
GNP1	2
HSC82	2
HSP78	2
HSP104	2
SSA1	2
SUI1	2
MBF1	2
MIM1	2
CPR1	2
ECM15	2
RIB4	2
SSS1	2
SBH2	2
TCP1	2
SUB2	2
VTC1	2
PRE4	2
DOT5	2
ADK1	2
CPR3	2
PRE8	2
SRP1	2
CCW14	2
GDH2	2
GUS1	2
NIT3	2
AAT2	2
HIS4	2
MRPS18	2
MRPS12	2
ADE2	2
RCF1	2
MPM1	2
CKB1	2
SGT1	2
ERV25	2
AIM2	2
MNP1	2
MDM35	2
TSC13	2
RSM7	2
YKT6	2
ERG10	2
ERD2	2
PET123	2
ERV1	2
FUM1	2
PET9	2
ATP1	2
MIC10	2
FIS1	2
ELF1	2
PTR2	2
ATP14	2
CPA1	2
CPA2	2
SEC62	2
RHO5	2
SER1	2
HSP60	2
PCK1	2
ATP19	2
ADE8	2
PHO85	2
MGT1	2
KGD1	2
LEU1	2
ILV6	2
SUI3	2
VMA9	2
COX16	2
COX5A	2
SCS2	2
NAP1	2
QCR6	2
MRPL39	2
PET100	2
SSC1	2
CBP4	2
MRPL33	2
AIM1	2
EMI1	2
LYS9	2
CMC1	2
PAI3	2
PSF3	2
RIB1	2
ERG2	2
STR2	2
NSG2	2
GET1	2
SKP1	2
VMA13	2
PRS2	2
AVT7	2
FIT3	2
UBI4	2
TPK1	2
GAD1	2
BCY1	2
RIM11	2
PIC2	2
DCS2	2
SPG1	2
[truncated: 395 more rows]
