# Supplementary figures and images for: A new protocol for single-cell RNA-seq reveals stochastic gene expression during lag phase in budding yeast
Source: eLife journal article supplement (doi:10.7554/elife.55320), 2020-05-18

**A**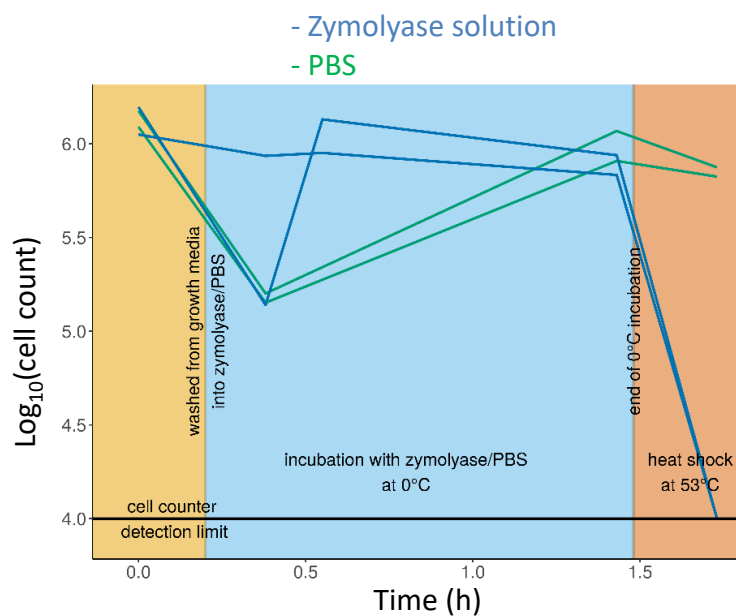**B**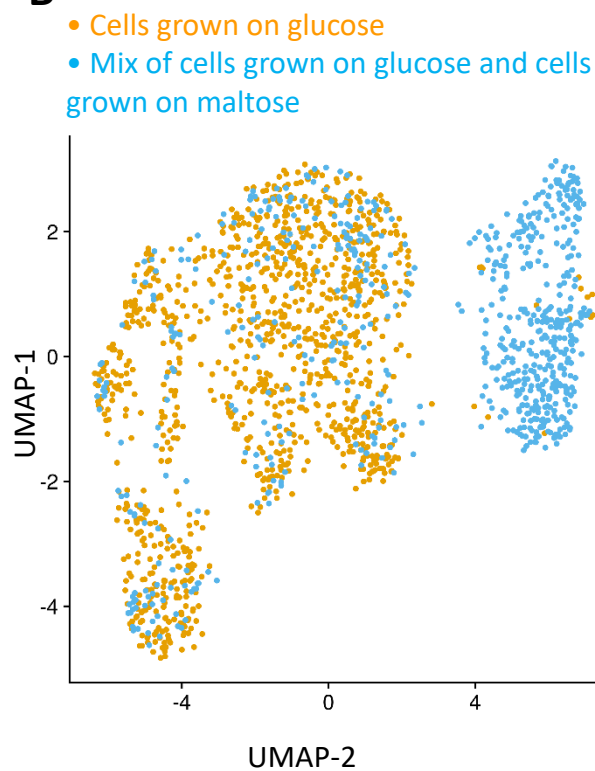**C**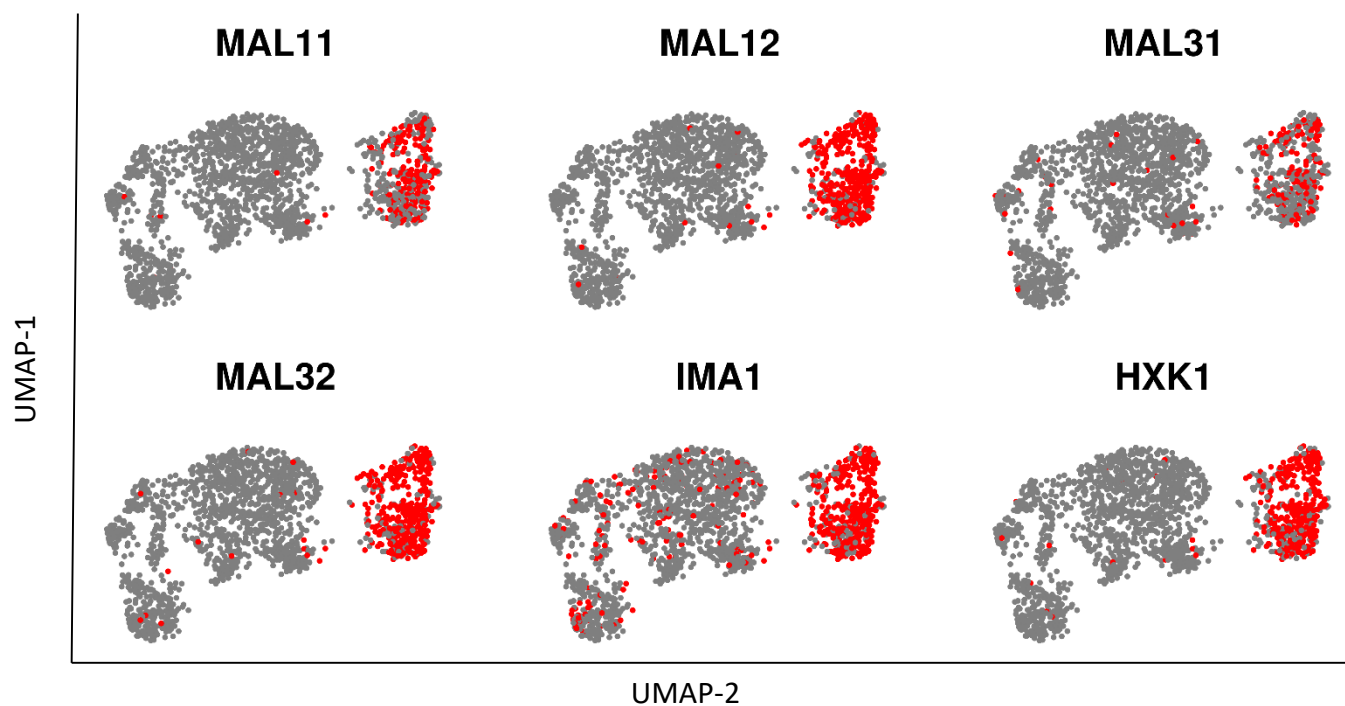

**D**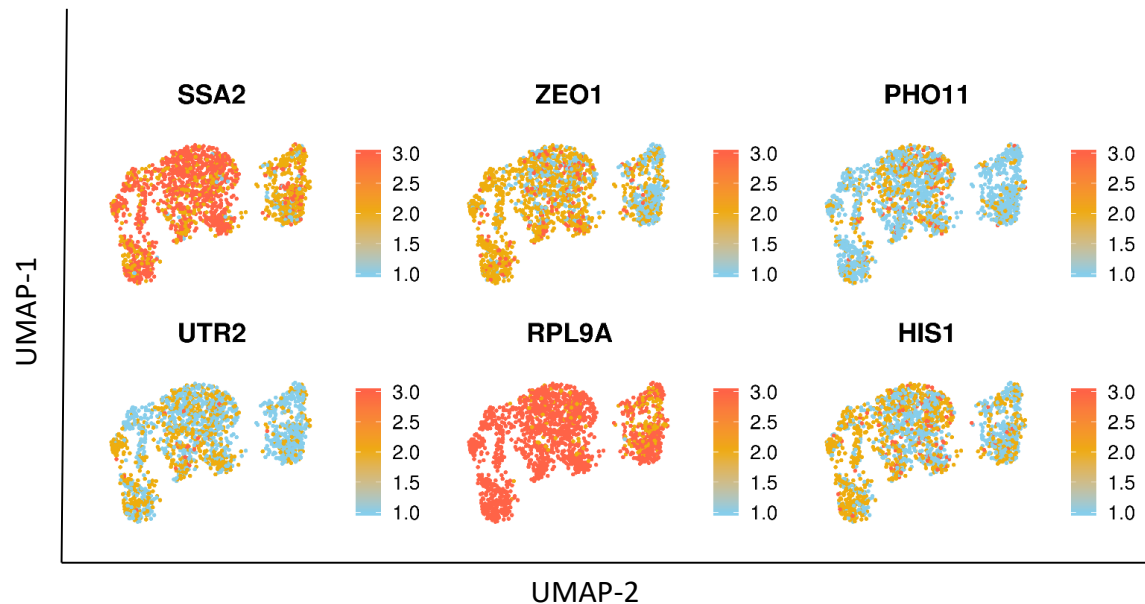**E**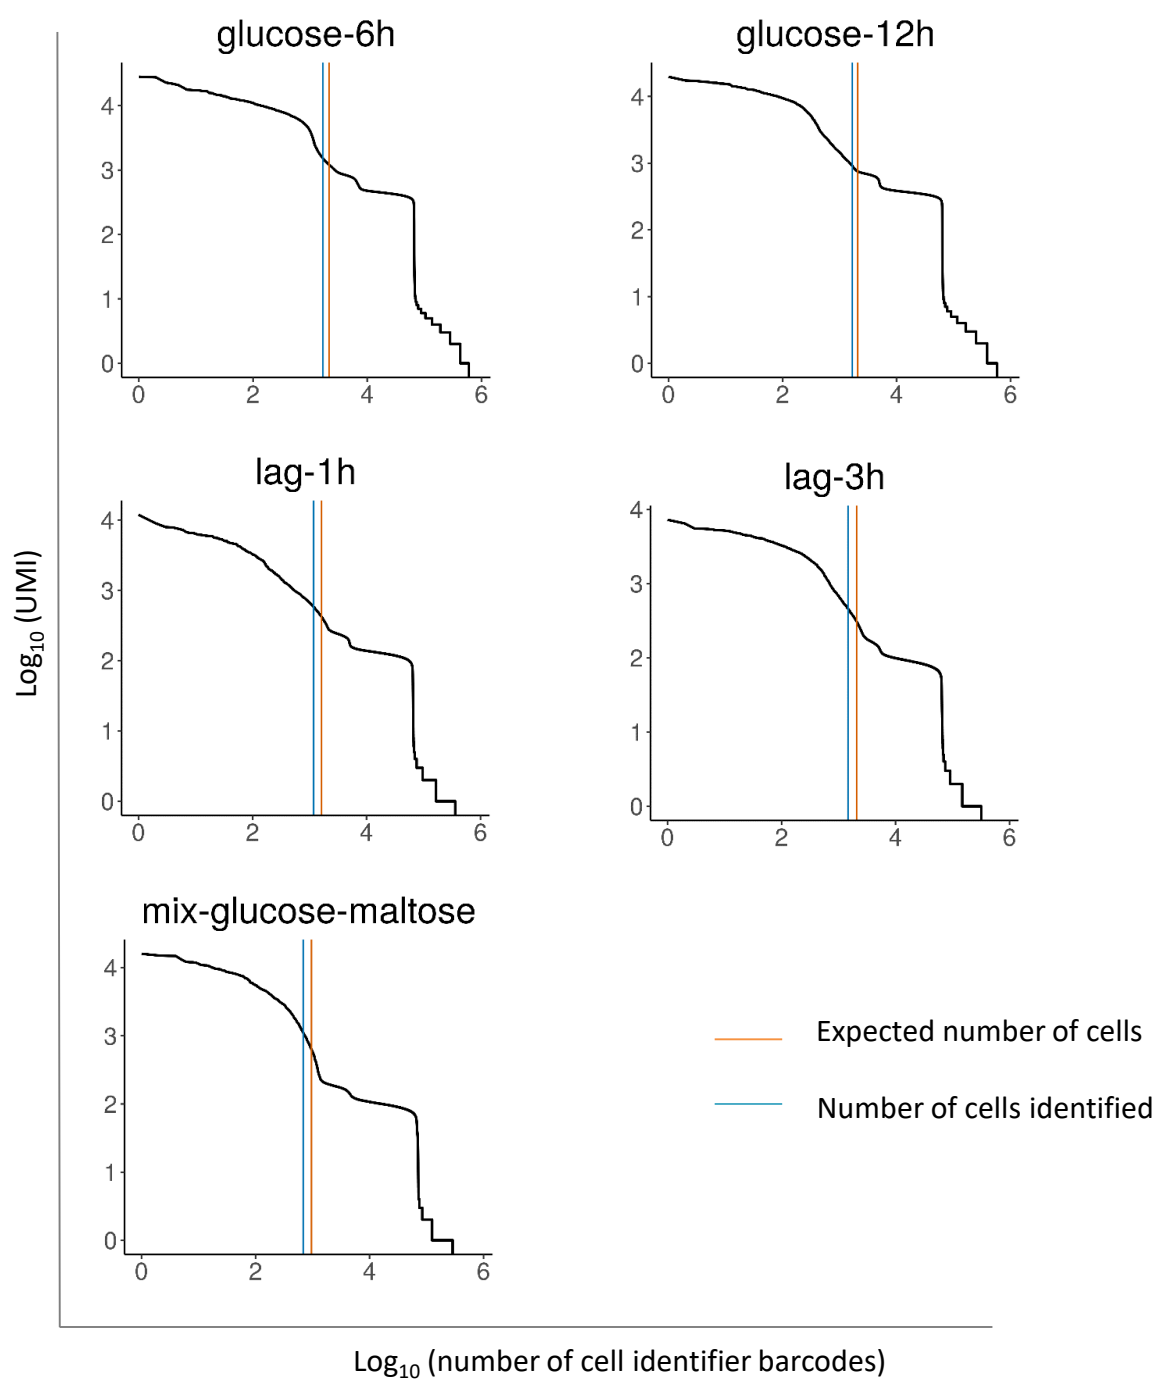

Supplement: supp [file elife_poa_e55320_Figure_1_figure_supplement_1.pdf › elife_poa_e55320_Figure_1_figure_supplement_1.pdf]

**A**

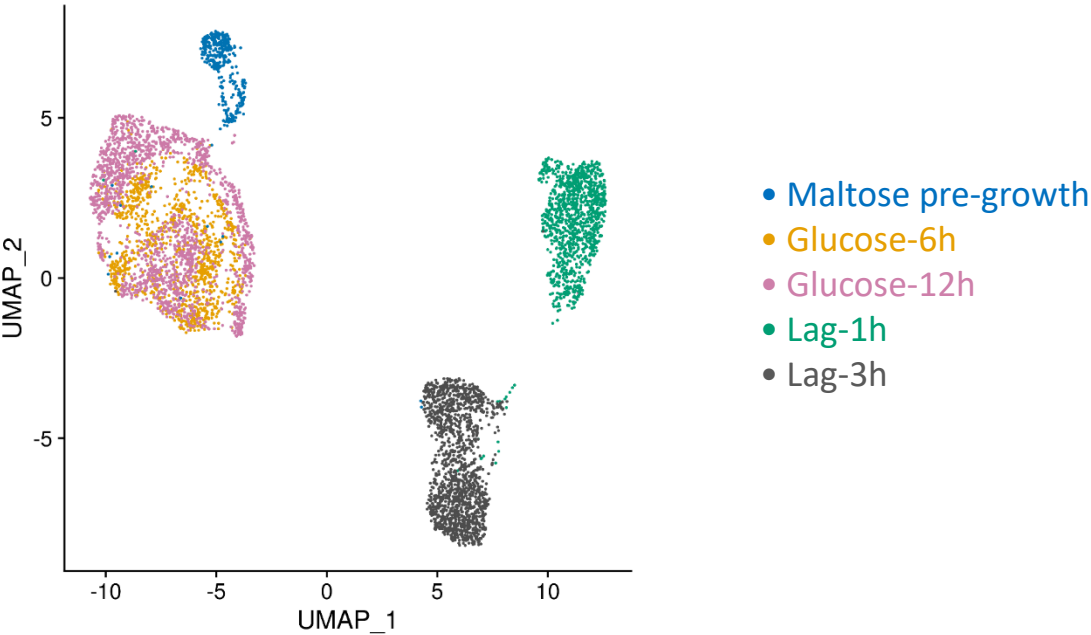

**B**

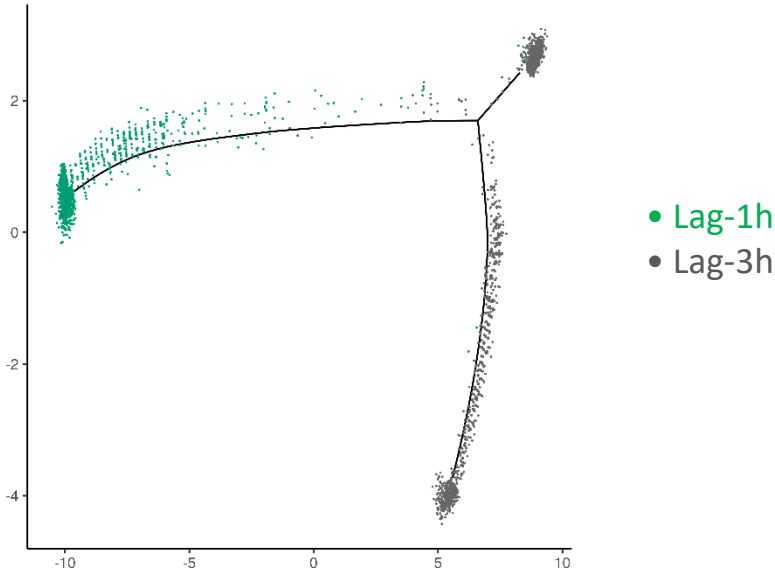

C

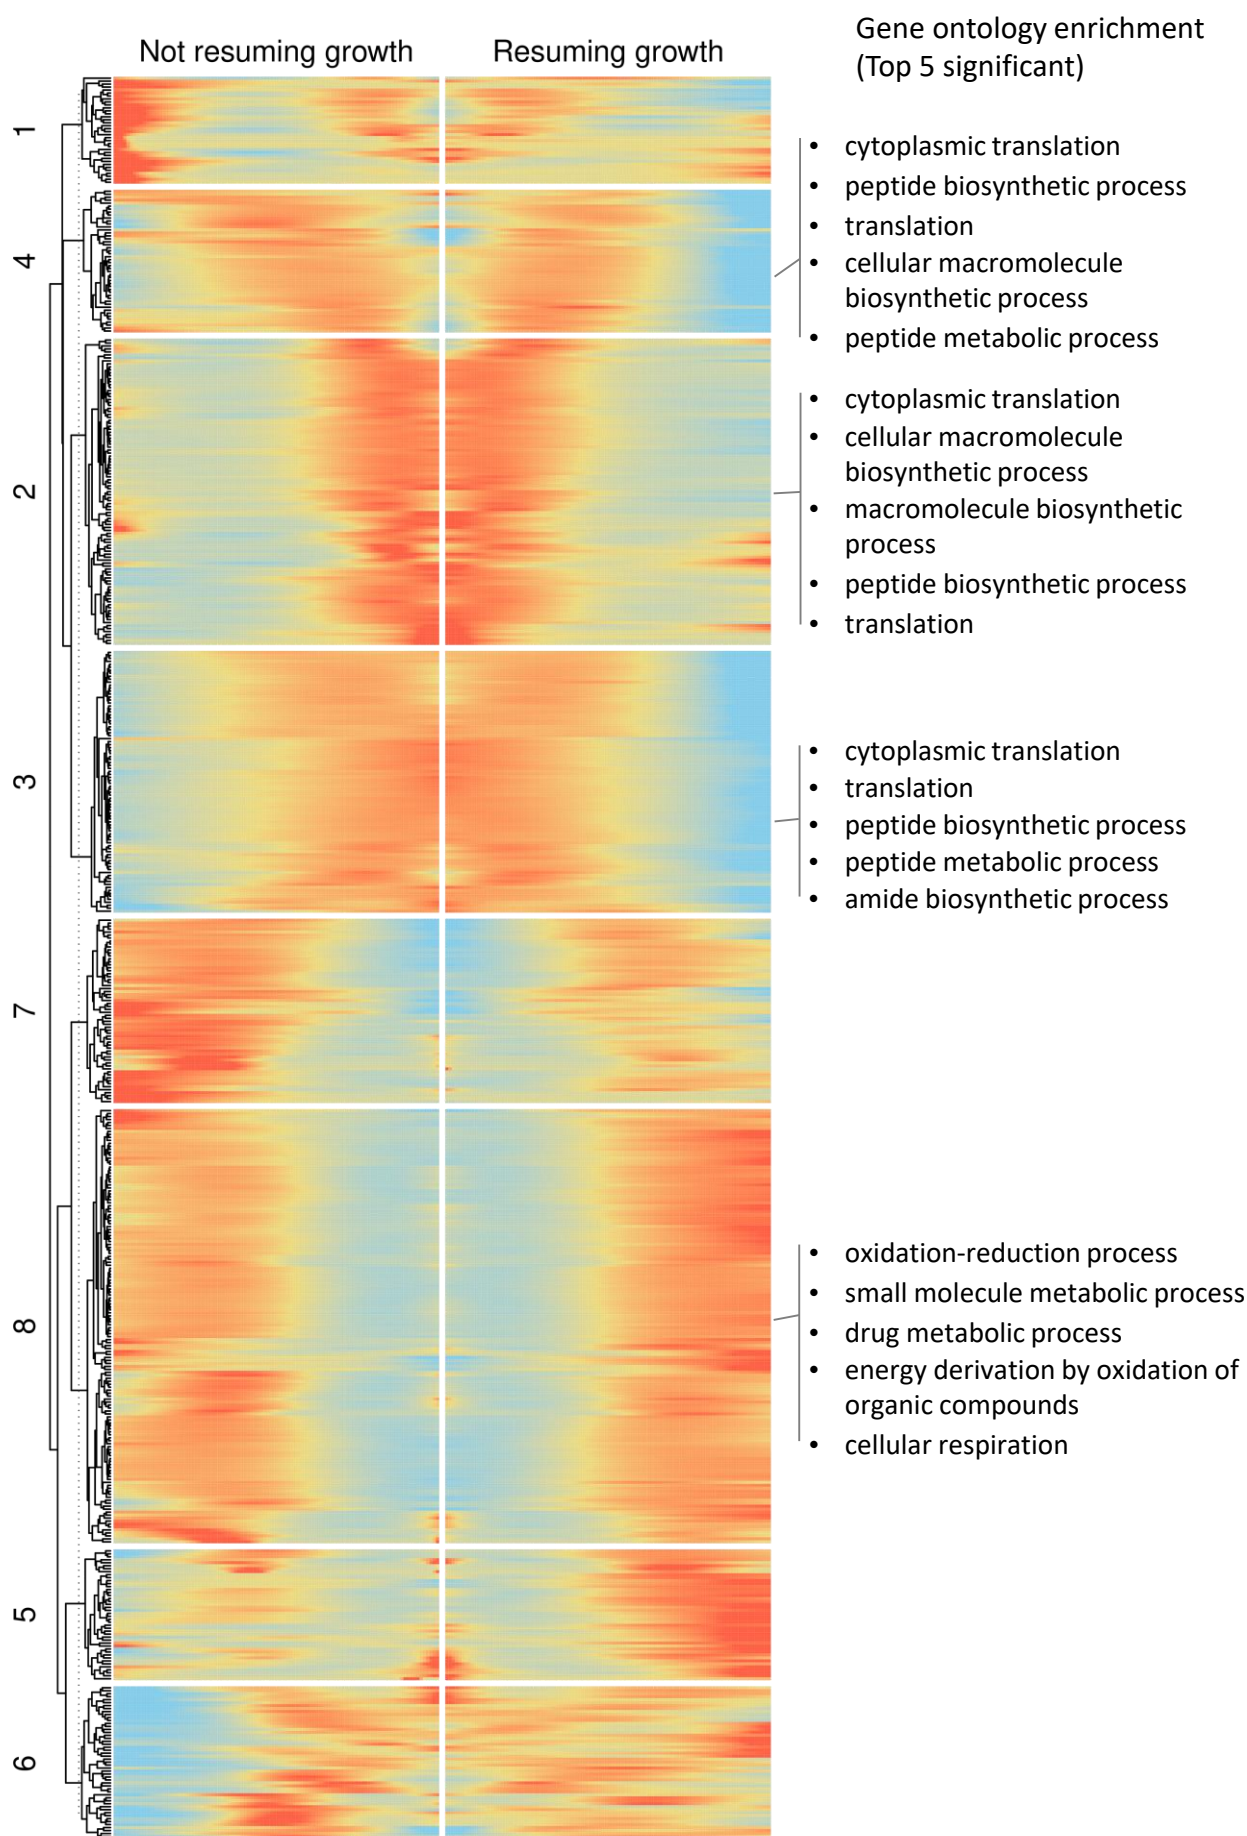

D

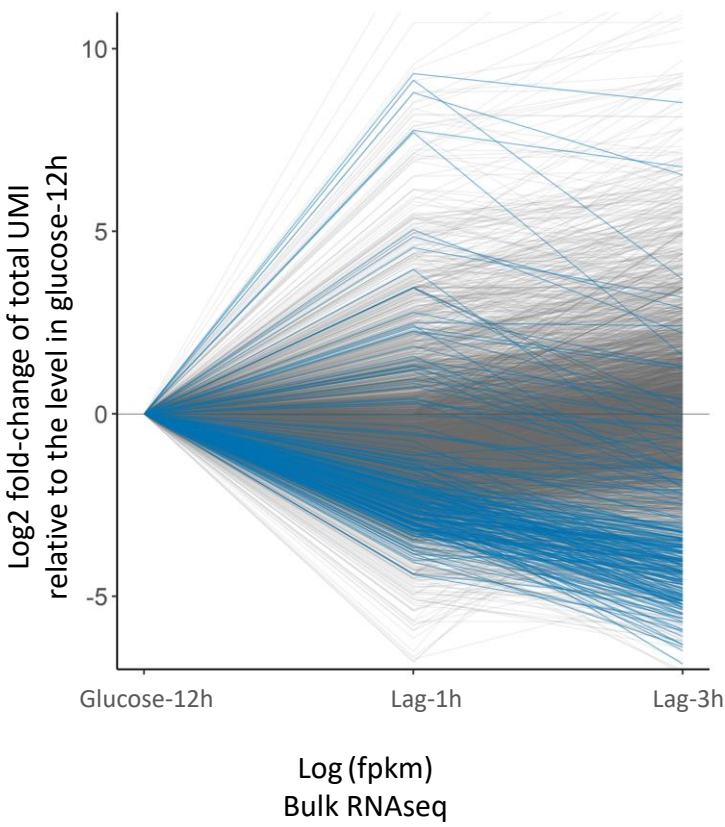

Supplement: supp [file elife_poa_e55320_Figure_2_figure_supplement_1.pdf › elife_poa_e55320_Figure_2_figure_supplement_1.pdf]

A

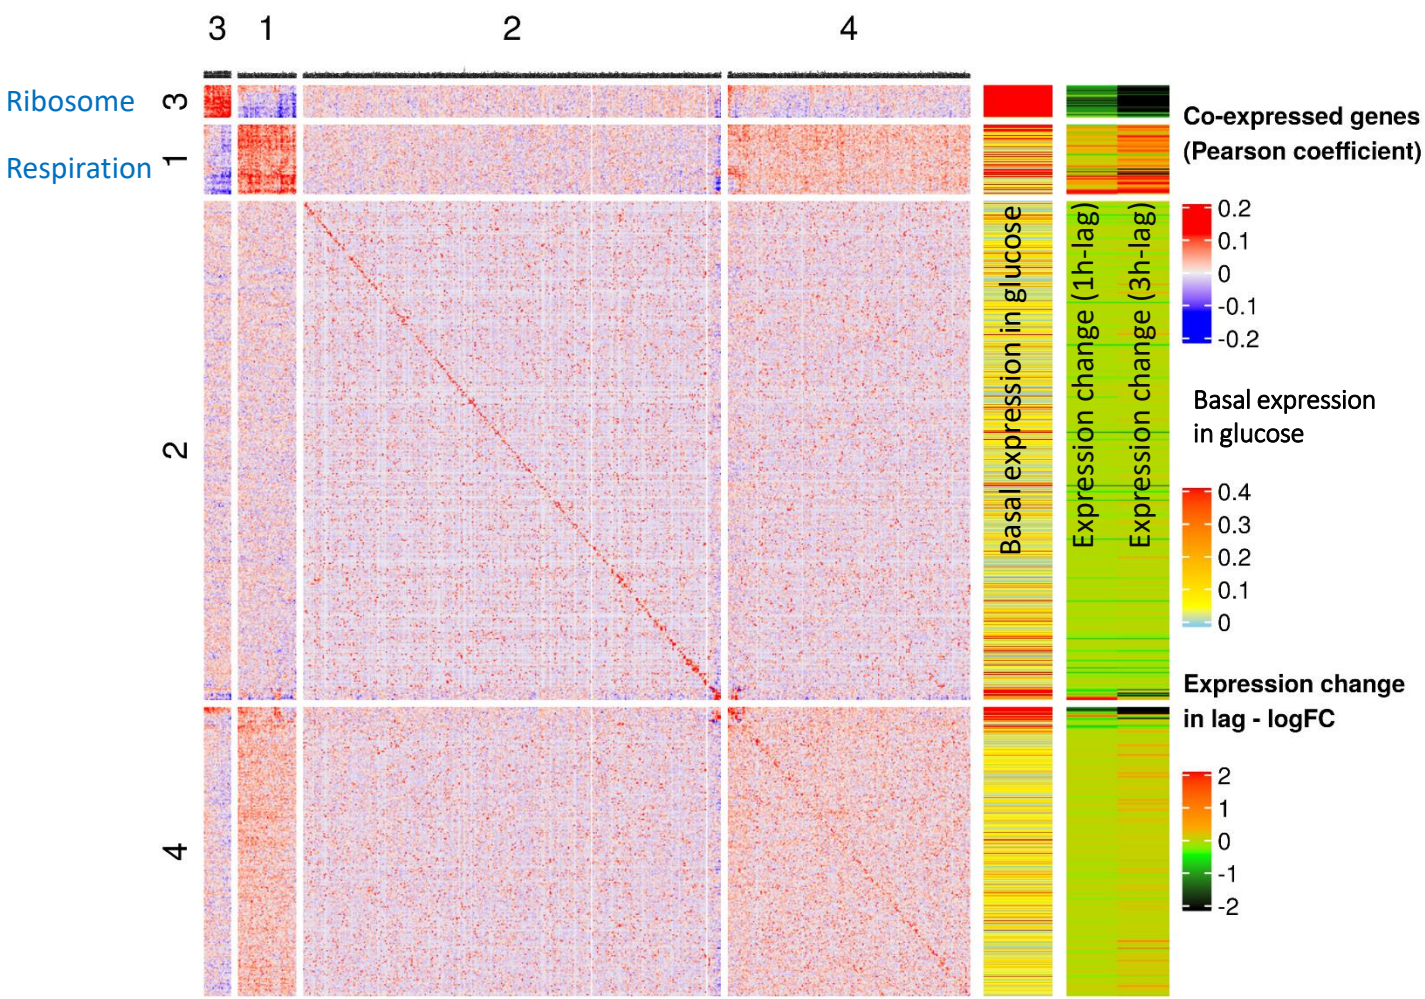

Supplement: supp [file elife_poa_e55320_Figure_3_figure_supplement_1.pdf › elife_poa_e55320_Figure_3_figure_supplement_1.pdf]

**A**

Segmented DIC80 image

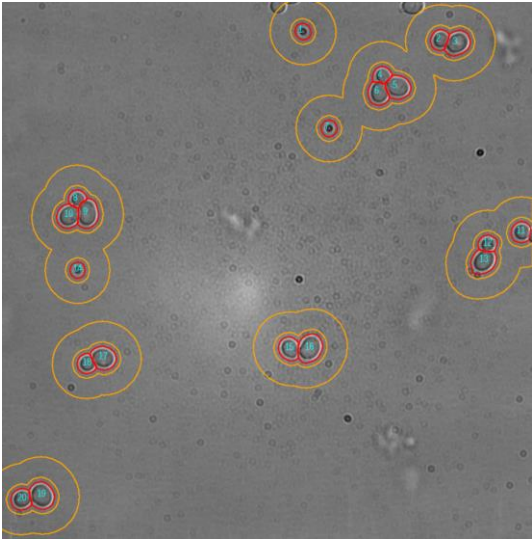

Fluorescence image

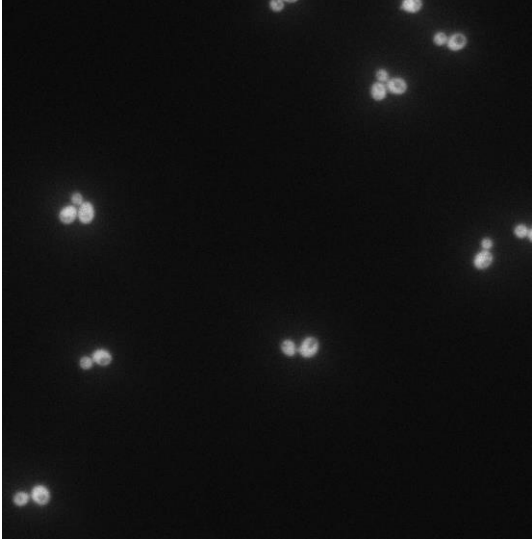

**B**

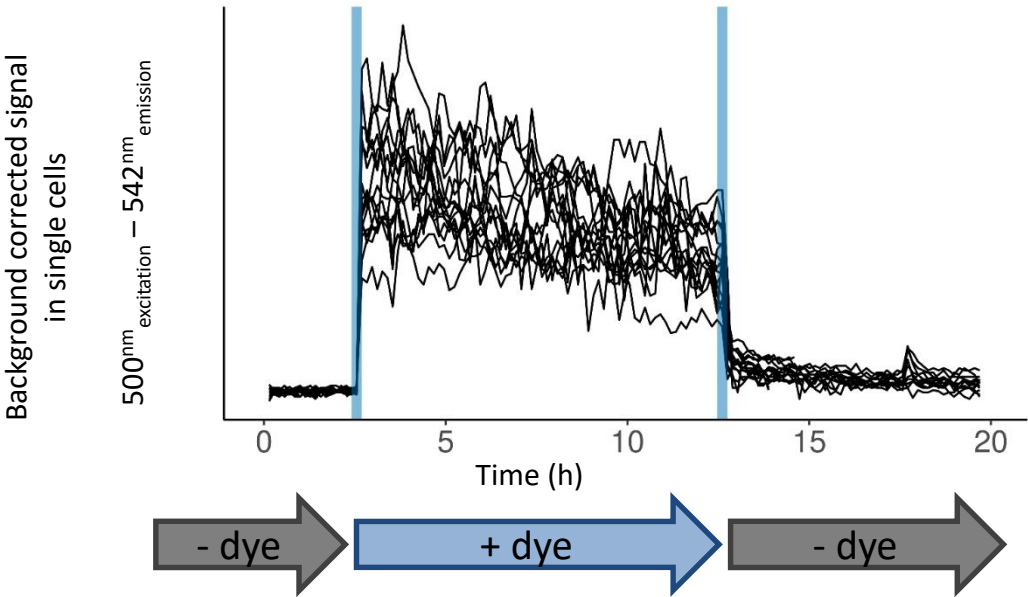

Supplement: supp [file elife_poa_e55320_Figure_4_figure_supplement_1.pdf › elife_poa_e55320_Figure_4_figure_supplement_1.pdf]
